# Supplementary material
Source: PubMed Central journal article supplement (PMC3227787)
Supplement: NIHMS332398-supplement-1.pdf [file NIHMS332398-supplement-1.pdf]

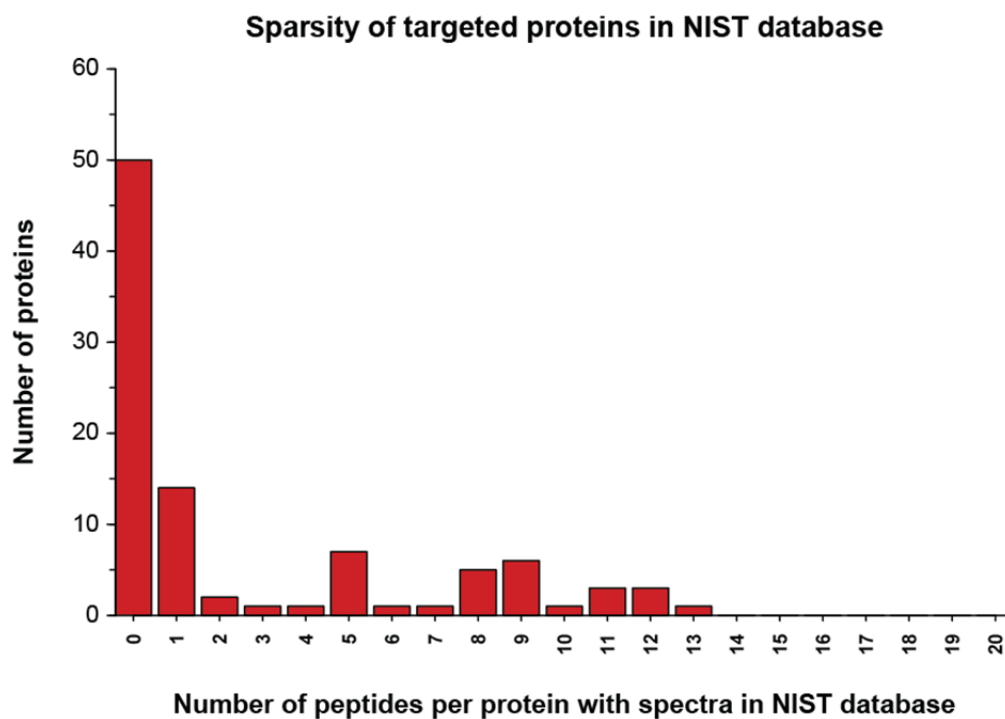

**Supplementary Figure 1. Poor coverage of target transcription factor proteins in NIST database**

A histogram of the number peptide MS/MS spectra in the NIST database per target protein demonstrates how underrepresented transcription factors are from current peptide spectral libraries. A majority of our target proteins have no MS/MS spectra in the NIST spectrum library.

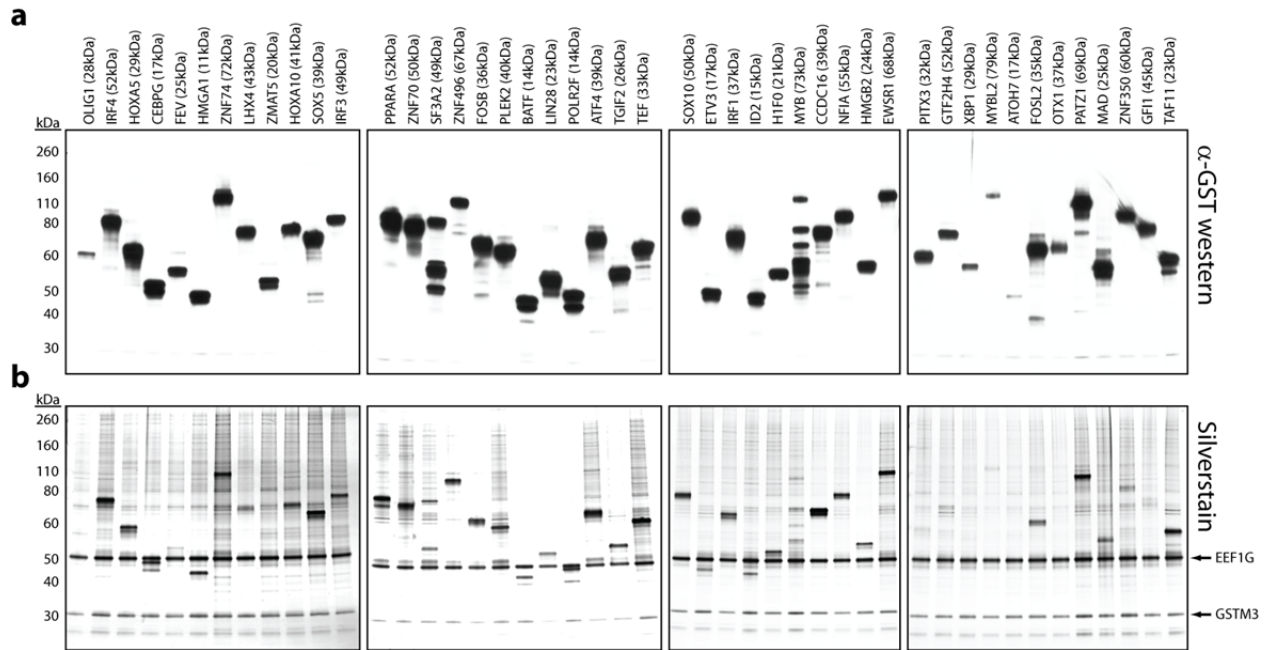

**Supplementary Figure 2. *In vitro*-synthesized proteins are enriched full-length proteins (a-b)** Glutathione-enriched protein samples from 46 of the 96 reactions were run on a denaturing SDS-PAGE gel and subjected to either western blotting with an anti-schistosomal GST antibody **(a)** or silverstaining **(b)**. The endogenous glutathione-binding proteins EEF1G and GSTM3 were identified using ‘shotgun’ mass spectrometry. The molecular weight of the full length cDNA is indicated in parentheses. These weights do not include the 26kDa GST tag.

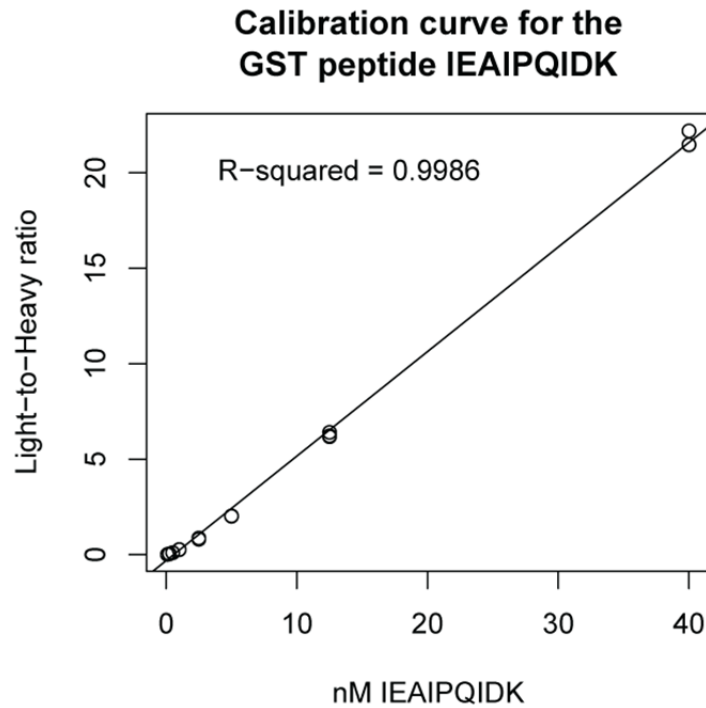

**Supplementary Figure 3. Calibration curve for the schistosomal GST peptide IEAIPQIDK**

A dilution curve of the unlabeled schistosomal GST peptide IEAIPQIDK peptide standard was spiked with a constant amount of the heavy labeled IEAIPQIDK peptide. The unlabeled to labeled peak area was measured by LC-SRM-MS for each standard in triplicate.

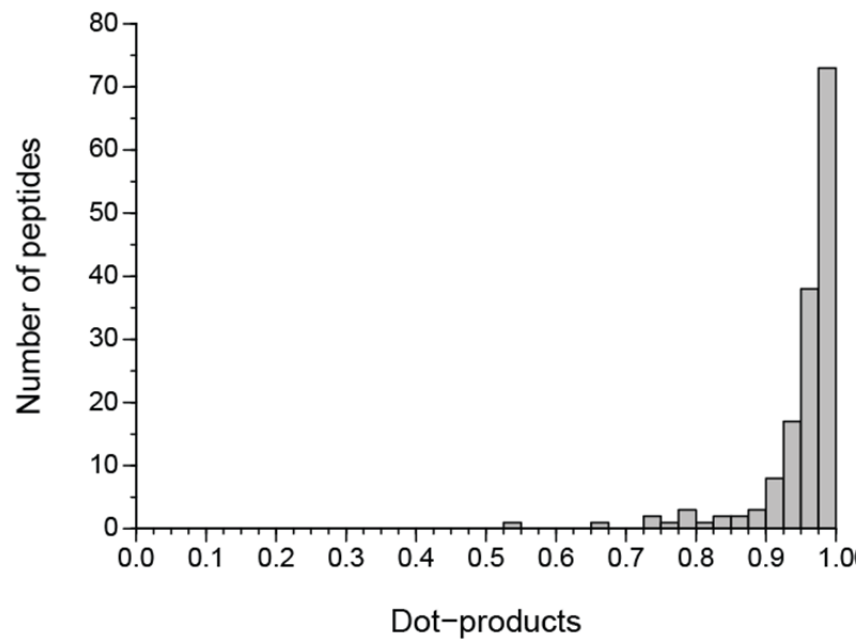

**Supplementary Figure 4. Histogram of dot-products for quality score 1 and 2 peptides**

Dot-products were calculated using Skyline and the 2011\_05\_26 NIST release of the H. sapiens Ion Trap peptide spectral library.

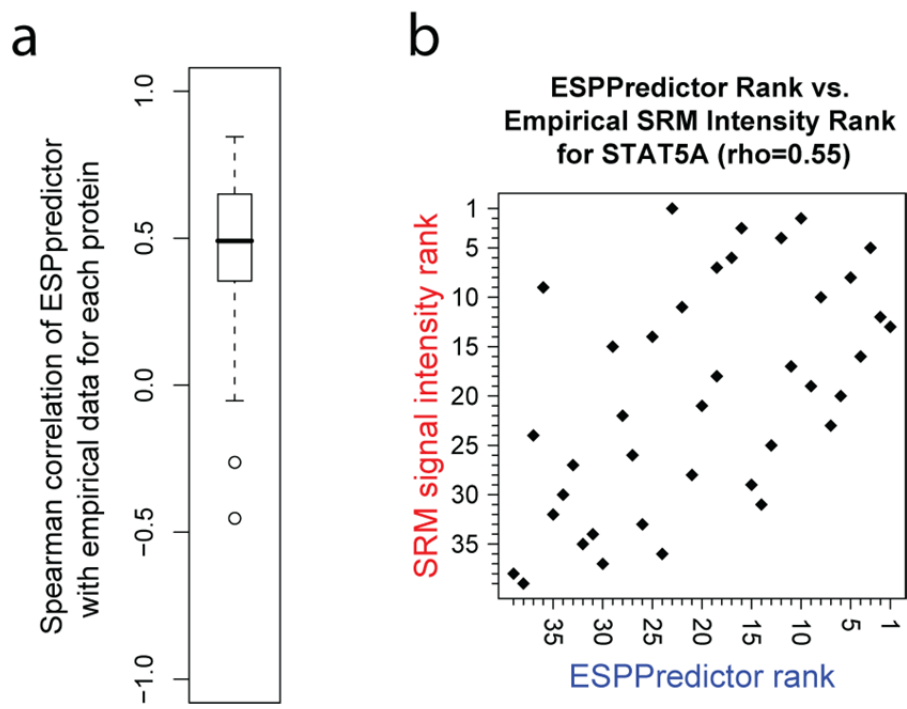

**Supplementary Figure 5. Spearman correlation of our empirical peptide ranking with ESPPredictor rankings**

**(a)** Box-and-whisker plot showing the distribution of spearman correlations for the 75 proteins with both ESPPredictor scores and empirical SRM peptide signal intensities. The spearman correlation of these 2 rankings for each protein ranged from -0.45 to 0.85 with an average correlation of 0.47. **(b)** A representative comparison of our empirical signal intensity rank for the STAT5A peptides and the ESPPredictor score rank for the same peptides. This comparison shows a better than average correlation ( $\rho = 0.55$  versus an average of  $\rho = 0.47$ ).

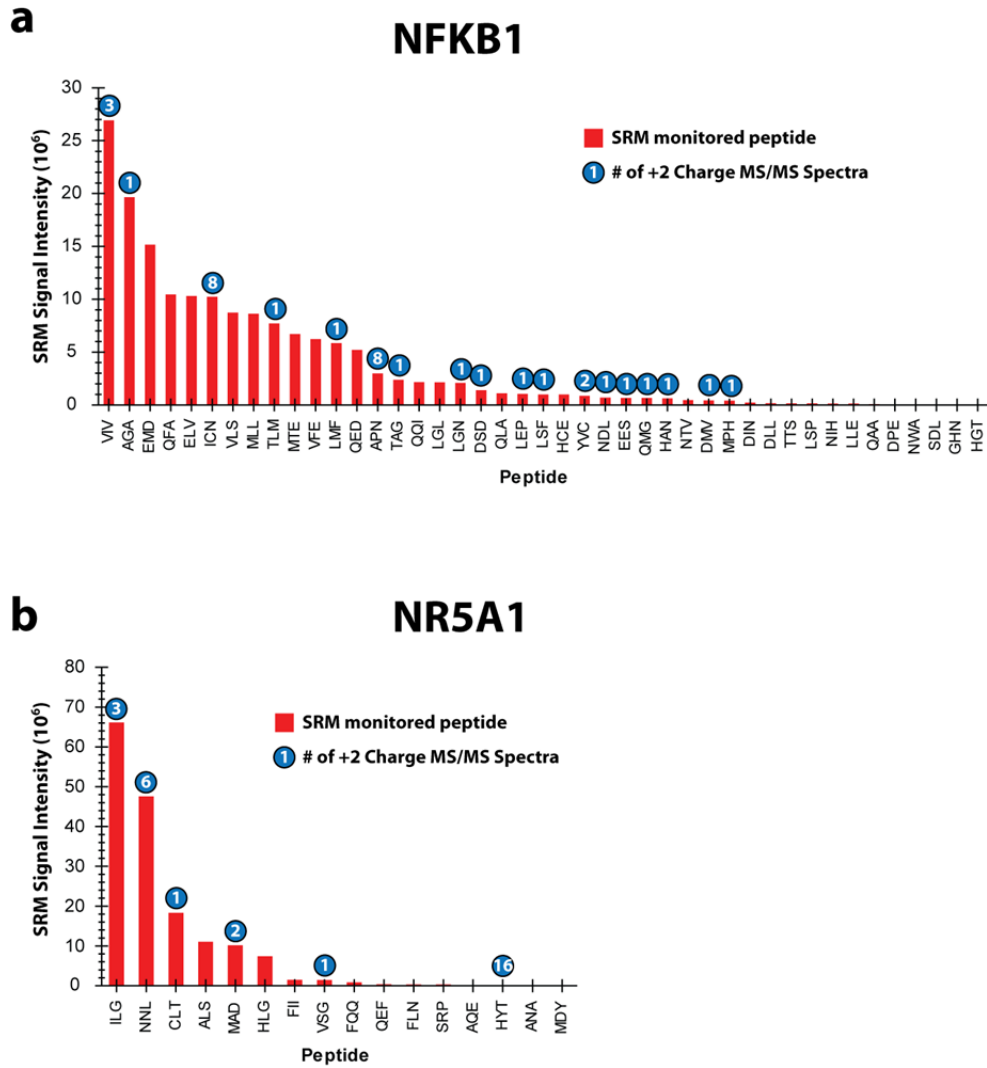

**Supplementary Figure 6. Peptide MS/MS spectrum counts are a poor predictor of targeted peptide signal intensity using selected reaction monitoring-mass spectrometry** (a-b) The NFKB1 (a) and NR5A1 (b) samples were subjected to ‘shotgun’ analysis using data-dependent acquisition. For each peptide, the number of +2 charge state spectra identified in this ‘shotgun’ run is indicated above the SRM signal intensity of that peptide.

| Item                                                       | Manufacturer      | Product #  | Cost per unit | Units used per 96 reactions | Cost per 96 reactions |
|------------------------------------------------------------|-------------------|------------|---------------|-----------------------------|-----------------------|
| Human In Vitro Protein Expression Kit - DNA (50 reactions) | Pierce            | 88855      | \$515         | 2                           | \$1,030.00            |
| Glutathione Sepharose 4B (10mL)                            | GE                | 17-0756-01 | \$242         | 0.2                         | \$48.40               |
| PPS Silent Surfactant (5x1 mg vials)                       | Protein Discovery | 21011      | \$199         | 1                           | \$199.00              |
| Oasis® MCX plate 30mg/60 µm 1/pkg                          | Waters            | 186000250  | \$326         | 1                           | \$326.00              |
| Sequencing Grade Modified Trypsin (100µg)                  | Promega           | V5111      | \$80          | 0.4                         | \$32.00               |
| Lab reagents                                               | Various           | Various    | \$150         | 1                           | \$150.00              |
| <b>Total:</b>                                              |                   |            |               |                             | <b>\$1,785.40</b>     |
| <b>Cost per reaction:</b>                                  |                   |            |               |                             | <b>\$18.60</b>        |

**Supplementary Figure 7. Reagent cost for generating *in vitro*-synthesized proteins from plasmids**

The reagent usage is based on our current working protocol (Methods). The prices used in this calculation are based on manufacture posted prices on May 24<sup>th</sup> 2011.

## SUPPLEMENTARY DATA LEGENDS

### **Supplementary Data 1. Rank order of proteotypic peptides and fragment ions for targeted proteins**

**(Pages 9-10)** Proteins targeted in this dataset. Columns: Gene Symbol, Gene Description, DNA-binding domain family, mRNA Accession, DNASU Plasmid Repository Clone ID, Page number for targeted data.

**(Pages 11-35)** For each protein monitored in this dataset, the summed peak intensity for each peptide, as well as the relative contribution of each fragment ion to this signal is displayed. Quality score 1 peptides are labeled in green, quality score 2 peptides are labeled in yellow, quality score 3 peptides are labeled in purple, and quality score 4 peptides are labeled in red.



## Proteins Targeted

| Gene Symbol | Description                                                                          | DNA-binding domain family                     | Accession  | DNASU Clone ID | Page   |
|-------------|--------------------------------------------------------------------------------------|-----------------------------------------------|------------|----------------|--------|
| ATF4        | activating transcription factor 4 (tax-responsive enhancer element B67)              | basic-leucine zipper (bZIP)                   | CR456384   | HsCD00301229   | pg. 12 |
| ATOH7       | atonal homolog 7 (Drosophila)                                                        | basic helix-loop-helix (bHLH)                 | BC032621   | HsCD00077283   | pg. 12 |
| BATF        | basic leucine zipper transcription factor, ATF-like                                  | basic-leucine zipper (bZIP)                   | NM_006399  | HsCD00301458   | pg. 12 |
| BHLHB2      | basic helix-loop-helix domain containing, class B, 2                                 | basic helix-loop-helix (bHLH)                 | BC082238   | HsCD00299716   | pg. 12 |
| CCDC16      | coiled-coil domain containing 16                                                     | zinc finger, C2H2-type (C2H2)                 | BC011584   | HsCD00078107   | pg. 13 |
| CEBPG       | CCAAT/enhancer binding protein (C/EBP), gamma                                        | basic-leucine zipper (bZIP)                   | BC007582   | HsCD00077759   | pg. 13 |
| CLOCK       | clock homolog (mouse)                                                                | basic helix-loop-helix (bHLH)                 | BC041878   | HsCD00299832   | pg. 13 |
| CREB1       | cAMP responsive element binding protein 1                                            | basic-leucine zipper (bZIP)                   | BC010636   | HsCD00077213   | pg. 13 |
| CTCF        | CCCTC-binding factor (zinc finger protein)                                           | zinc finger, C2H2-type (C2H2)                 | BC014267   | HsCD00078657   | pg. 14 |
| DMRT1       | doublesex and mab-3 related transcription factor 1                                   | DM DNA-binding domain (DM)                    | BC040847   | HsCD00300076   | pg. 14 |
| DMRTC2      | DMRT-like family C2                                                                  | DM DNA-binding domain (DM)                    | BC029202   | HsCD00299763   | pg. 14 |
| E2F5        | E2F transcription factor 5, p130-binding                                             | TF E2F/dimerisation partner (TDP)             | NM_001951  | HsCD00302966   | pg. 14 |
| ERG         | v-ets erythroblastosis virus E26 oncogene like (avian)                               | ETS-domain (ETS)                              | BC040168   | HsCD00299791   | pg. 15 |
| ETS2        | v-ets erythroblastosis virus E26 oncogene homolog 2 (avian)                          | ETS-domain (ETS)                              | NM_005239  | HsCD00301527   | pg. 15 |
| ETV3        | ets variant gene 3                                                                   | ETS-domain (ETS)                              | BC022868   | HsCD00077713   | pg. 15 |
| EWSR1       | Ewing sarcoma breakpoint region 1                                                    | ETS-domain (ETS)                              | CR456490   | HsCD00301321   | pg. 15 |
| EZH2        | enhancer of zeste homolog 2 (Drosophila)                                             | SANT-domain (SANT)                            | BC001858   | HsCD00076778   | pg. 16 |
| FEV         | FEV (ETS oncogene family)                                                            | ETS-domain (ETS)                              | BC023511   | HsCD00079089   | pg. 16 |
| FOSB        | FBJ murine osteosarcoma viral oncogene homolog B                                     | basic-leucine zipper (bZIP)                   | NM_006732  | HsCD00301650   | pg. 16 |
| FOSL2       | FOS-like antigen 2                                                                   | basic-leucine zipper (bZIP)                   | BC022791   | HsCD00079102   | pg. 16 |
| FOXD4L1     | forkhead box D4 like 1                                                               | Forkhead-domain (Forkhead)                    | NM_012184  | HsCD00302896   | pg. 17 |
| FOXD4L2     | FOXD4-like 2                                                                         | Forkhead-domain (Forkhead)                    | BC103887   | HsCD00299718   | pg. 17 |
| FOXN1       | forkhead box N1                                                                      | Forkhead-domain (Forkhead)                    | NM_003593  | HsCD00302766   | pg. 17 |
| FOXR2       | forkhead box R2                                                                      | Forkhead-domain (Forkhead)                    | BC012934   | HsCD00301098   | pg. 17 |
| GATA2       | GATA binding protein 2                                                               | zinc finger, GATA-type (ZNF-GATA)             | BC002557   | HsCD00077154   | pg. 18 |
| GATA3       | GATA binding protein 3                                                               | zinc finger, GATA-type (ZNF-GATA)             | BC006793.1 | HsCD00305430   | pg. 18 |
| GF1         | growth factor independent 1                                                          | zinc finger, C2H2-type (C2H2)                 | BC032751   | HsCD00079248   | pg. 18 |
| GMEB1       | glucocorticoid modulatory element binding protein 1                                  | SAND-domain (SAND)                            | BC001473   | HsCD00299674   | pg. 18 |
| GMEB2       | glucocorticoid modulatory element binding protein 2                                  | SAND-domain (SAND)                            | BC036305   | HsCD00299890   | pg. 19 |
| GTF2H4      | general transcription factor IIH, polypeptide 4, 52kDa                               | Other                                         | BC004935   | HsCD00079304   | pg. 19 |
| H1F0        | H1 histone family, member 0                                                          | Other                                         | CR456502   | HsCD00301329   | pg. 19 |
| HMGAl       | high mobility group AT-hook 1                                                        | high mobility group-type (HMG)                | NM_002131  | HsCD00301489   | pg. 19 |
| HMG2        | high-mobility group box 2                                                            | high mobility group-type (HMG)                | BC001063   | HsCD00078150   | pg. 20 |
| HOXA10      | homeobox A10                                                                         | Homeodomain (Homeodomain)                     | BC013971   | HsCD00078539   | pg. 20 |
| HOXA5       | homeobox A5                                                                          | Homeodomain (Homeodomain)                     | NM_019102  | HsCD00304202   | pg. 20 |
| HSF4        | heat shock transcription factor 4                                                    | Heat-shock factor (Heat Shock)                | NM_001538  | HsCD00302758   | pg. 20 |
| HSFY2       | heat shock transcription factor, Y linked 2                                          | Heat-shock factor (Heat Shock)                | NM_153716  | HsCD00302426   | pg. 21 |
| ID2         | inhibitor of DNA binding 2, dominant negative helix-loop-helix protein               | helix-loop-helix (HLH)                        | D13891     | HsCD00301602   | pg. 21 |
| ID3         | inhibitor of DNA binding 3, dominant negative helix-loop-helix protein               | helix-loop-helix (HLH)                        | BC003107   | HsCD00078304   | pg. 21 |
| IRF1        | interferon regulatory factor 1                                                       | Interferon regulatory factor (IRF)            | BC009483   | HsCD00077440   | pg. 21 |
| IRF3        | interferon regulatory factor 3                                                       | Interferon regulatory factor (IRF)            | BC009395   | HsCD00079105   | pg. 22 |
| IRF4        | interferon regulatory factor 4                                                       | Interferon regulatory factor (IRF)            | BC015752   | HsCD00077553   | pg. 22 |
| IRF5        | interferon regulatory factor 5                                                       | Interferon regulatory factor (IRF)            | BC004139   | HsCD00078081   | pg. 22 |
| LEF1        | lymphoid enhancer-binding factor 1                                                   | high mobility group-type (HMG)                | BC050632   | HsCD00299770   | pg. 22 |
| LHX4        | LIM homeobox 4                                                                       | Homeodomain (Homeodomain)                     | BC011759   | HsCD00077458   | pg. 23 |
| LIN28       | lin-28 homolog (C. elegans)                                                          | zinc finger, C2HC-type (C2HC)                 | BC028566   | HsCD00079059   | pg. 23 |
| MAD         | MAX dimerization protein 1                                                           | basic helix-loop-helix leucine zipper (bHLHZ) | L06895     | HsCD00301580   | pg. 23 |
| MAX         | MYC associated factor X                                                              | basic helix-loop-helix leucine zipper (bHLHZ) | NM_002382  | HsCD00301600   | pg. 23 |
| MEF2A       | MADS box transcription enhancer factor 2, polypeptide A (myocyte enhancer factor 2A) | MADs-box (MADs-box)                           | BC013437   | HsCD00299868   | pg. 24 |
| MEF2C       | MADS box transcription enhancer factor 2, polypeptide C (myocyte enhancer factor 2C) | MADs-box (MADs-box)                           | BC026341   | HsCD00300012   | pg. 24 |
| MYB         | v-myb myeloblastosis viral oncogene homolog (avian)                                  | SANT-domain (SANT)                            | AF104863   | HsCD00301531   | pg. 24 |
| MYBL2       | v-myb myeloblastosis viral oncogene homolog (avian)-like 2                           | SANT-domain (SANT)                            | BC007585   | HsCD00077770   | pg. 24 |
| MYC         | v-myc myelocytomatosis viral oncogene homolog (avian)                                | basic helix-loop-helix leucine zipper (bHLHZ) | BC000141   | HsCD00076570   | pg. 25 |
| MYF6        | myogenic factor 6 (herculin)                                                         | basic helix-loop-helix (bHLH)                 | BC017834   | HsCD00077638   | pg. 25 |
| NFATC3      | nuclear factor of activated T-cells, cytoplasmic, calcineurin-dependent 3            | Cell surface receptor (IPT/TIG)               | BC001050   | HsCD00077145   | pg. 25 |
| NFE2        | nuclear factor (erythroid-derived 2), 45kDa                                          | basic-leucine zipper (bZIP)                   | BC005044   | HsCD00079103   | pg. 25 |
| NFIA        | nuclear factor I/A                                                                   | nuclear factor I-domain (NFI)                 | BC022264   | HsCD00077446   | pg. 26 |
| NFIC        | nuclear factor I/C (CCAAT-binding transcription factor)                              | nuclear factor I-domain (NFI)                 | BC012120   | HsCD00078641   | pg. 26 |
| NFKB1       | nuclear factor of kappa light polypeptide gene enhancer in B-cells 1 (p105)          | Cell surface receptor (IPT/TIG)               | BC051765   | HsCD00301116   | pg. 26 |
| NR113       | nuclear receptor subfamily 1, group I, member 3                                      | Nuclear hormone receptor (NHR)                | BC089626.1 | HsCD00304068   | pg. 27 |
| NR2E1       | nuclear receptor subfamily 2, group E, member 1                                      | Nuclear hormone receptor (NHR)                | NM_003269  | HsCD00305417   | pg. 27 |
| NR3C1       | nuclear receptor subfamily 3, group C, member 1 (glucocorticoid receptor)            | Nuclear hormone receptor (NHR)                | BC015610   | HsCD00300083   | pg. 27 |
| NR5A1       | nuclear receptor subfamily 5, group A, member 1                                      | Nuclear hormone receptor (NHR)                | BC032501   | HsCD00299843   | pg. 27 |
| OLIG1       | oligodendrocyte transcription factor 1                                               | basic helix-loop-helix (bHLH)                 | BC033290   | HsCD00076967   | pg. 28 |
| OTX1        | orthodenticle homolog 1 (Drosophila)                                                 | Homeodomain (Homeodomain)                     | BC007621   | HsCD00077740   | pg. 28 |
| PATZ1       | POZ (BTB) and AT hook containing zinc finger 1                                       | zinc finger, C2H2-type (C2H2)                 | CR456613   | HsCD00301150   | pg. 28 |
| PITX3       | paired-like homeodomain transcription factor 3                                       | Homeodomain (Homeodomain)                     | BC011642   | HsCD00078535   | pg. 28 |
| PLEK2       | pleckstrin 2                                                                         | Other                                         | BC001226   | HsCD00077265   | pg. 29 |
| POLR2F      | polymerase (RNA) II (DNA directed) polypeptide F                                     | Other                                         | CR456546   | HsCD00301192   | pg. 29 |
| POU1F1      | POU domain, class 1, transcription factor 1 (Pit1, growth hormone factor 1)          | POU-domain (POU)                              | NM_000306  | HsCD00302903   | pg. 29 |
| POU3F4      | POU domain, class 3, transcription factor 4                                          | POU-domain (POU)                              | NM_000307  | HsCD00303140   | pg. 29 |
| POU4F1      | POU domain, class 4, transcription factor 1                                          | POU-domain (POU)                              | NM_006237  | HsCD00302919   | pg. 30 |
| POU4F3      | POU class 4 homeobox 3                                                               | POU-domain (POU)                              | BC104923   | HsCD00300001   | pg. 30 |
| PPARA       | peroxisome proliferator-activated receptor alpha                                     | Nuclear hormone receptor (NHR)                | CR456547   | HsCD00304173   | pg. 30 |
| SF3A2       | splicing factor 3a, subunit 2, 66kDa                                                 | zinc finger, C2H2-type (C2H2)                 | BC004434   | HsCD00079081   | pg. 30 |

| Gene Symbol | Description                                                                      |                                                                     | Accession | DNASU Clone ID | Page   |
|-------------|----------------------------------------------------------------------------------|---------------------------------------------------------------------|-----------|----------------|--------|
| SOX10       | SRY (sex determining region Y)-box 10                                            | high mobility group-type (HMG)                                      | CR456584  | HsCD00301364   | pg. 31 |
| SOX5        | SRY (sex determining region Y)-box 5                                             | high mobility group-type (HMG)                                      | NM_006940 | HsCD00301463   | pg. 31 |
| SREBF2      | sterol regulatory element binding transcription factor 2                         | basic helix-loop-helix leucine zipper (bHLHZ)                       | CT841522  | HsCD00301198   | pg. 31 |
| STAT5A      | signal transducer and activator of transcription 5A                              | Signal Transducers and Activators of Transcription subdomain (STAT) | BC027036  | HsCD00076786   | pg. 32 |
| STAT5B      | signal transducer and activator of transcription 5B                              | Signal Transducers and Activators of Transcription subdomain (STAT) | BC065227  | HsCD00299823   | pg. 32 |
| TAF11       | TAF11 RNA polymerase II, TATA box binding protein (TBP)-associated factor, 28kDa | Other                                                               | NM_005643 | HsCD00301672   | pg. 32 |
| TEF         | thyrotrophic embryonic factor                                                    | basic-leucine zipper (bZIP)                                         | NM_003216 | HsCD00304220   | pg. 33 |
| TFAP2A      | transcription factor AP-2 alpha (activating enhancer binding protein 2 alpha)    | Transcription factor AP-2 (AP2)                                     | BC017754  | HsCD00077076   | pg. 33 |
| TFAP2B      | transcription factor AP-2 beta (activating enhancer binding protein 2 beta)      | Transcription factor AP-2 (AP2)                                     | BC037225  | HsCD00076757   | pg. 33 |
| TFCP2L1     | transcription factor CP2-like 1                                                  | CP2 transcription factor (CP2)                                      | BC064698  | HsCD00299737   | pg. 33 |
| TFCP2L4     | transcription factor CP2-like 4                                                  | CP2 transcription factor (CP2)                                      | BC036890  | HsCD00299801   | pg. 34 |
| TFDP2       | transcription factor Dp-2 (E2F dimerization partner 2)                           | TF E2F/dimerisation partner (TDP)                                   | BC021113  | HsCD00299708   | pg. 34 |
| TGIF2       | TGFB-induced factor 2 (TALE family homeobox)                                     | Homeodomain (Homeodomain)                                           | BC012816  | HsCD00079074   | pg. 34 |
| TP53        | tumor protein p53 (Li-Fraumeni syndrome)                                         | p53-like DNA-binding (p53)                                          | BC003596  | HsCD00078349   | pg. 34 |
| TP73L       | tumor protein p73-like                                                           | p53-like DNA-binding (p53)                                          | BC039815  | HsCD00299815   | pg. 35 |
| XBP1        | X-box binding protein 1                                                          | basic-leucine zipper (bZIP)                                         | CR456611  | HsCD00301204   | pg. 35 |
| ZMAT5       | zinc finger, matrin type 5                                                       | zinc finger, C2H2-type (C2H2)                                       | CR456353  | HsCD00301319   | pg. 35 |
| ZNF496      | zinc finger protein 496                                                          | zinc finger, C2H2-type (C2H2)                                       | BC007263  | HsCD00077733   | pg. 35 |
| ZNF530      | zinc finger protein 530                                                          | zinc finger, C2H2-type (C2H2)                                       | BC060865  | HsCD00301131   | pg. 36 |
| ZNF70       | zinc finger protein 70 (Cos17)                                                   | zinc finger, C2H2-type (C2H2)                                       | CR456615  | HsCD00301373   | pg. 36 |
| ZNF74       | zinc finger protein 74                                                           | zinc finger, C2H2-type (C2H2)                                       | CR456616  | HsCD00301379   | pg. 36 |

## Table Legend

| Peptide Quality Score |
|-----------------------|
| 1                     |
| 2                     |
| 3                     |
| 4                     |

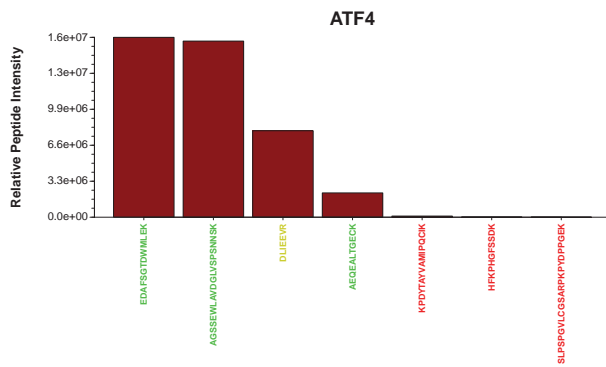

| Peptides             | Relative Contribution of Transition to Signal (%) |    |    |    |    |    |    |     |     |     |     |     |     |     |     |     |
|----------------------|---------------------------------------------------|----|----|----|----|----|----|-----|-----|-----|-----|-----|-----|-----|-----|-----|
|                      | Y3                                                | Y4 | Y5 | Y6 | Y7 | Y8 | Y9 | Y10 | Y11 | Y12 | Y13 | Y14 | Y15 | Y16 | Y17 | Y18 |
| AEQEALTGECK          | 2                                                 | 19 | 27 | 16 | 17 | 13 | 6  |     |     |     |     |     |     |     |     |     |
| AGSSEWLAVDGLVSPSNNSK | 2                                                 | 2  | 2  | 23 | 28 | 8  | 2  | 8   | 10  | 6   | 7   | 2   |     |     |     |     |
| EDAFSGTDWMLEK        | 9                                                 | 8  | 8  | 6  | 5  | 22 | 33 | 7   | 2   |     |     |     |     |     |     |     |
| DLIEEVR              | 10                                                | 41 | 49 |    |    |    |    |     |     |     |     |     |     |     |     |     |

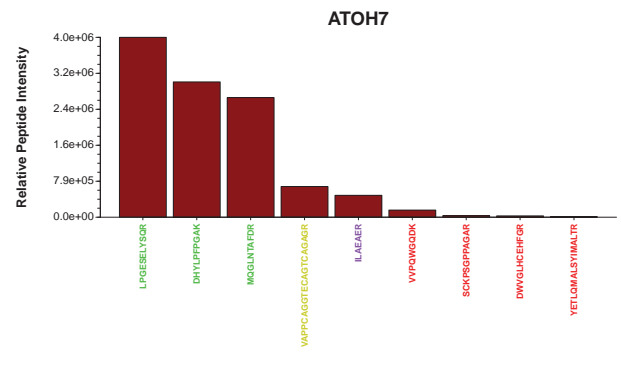

| Peptides             | Relative Contribution of Transition to Signal (%) |    |    |    |    |    |    |     |     |     |     |     |     |     |     |     |
|----------------------|---------------------------------------------------|----|----|----|----|----|----|-----|-----|-----|-----|-----|-----|-----|-----|-----|
|                      | Y3                                                | Y4 | Y5 | Y6 | Y7 | Y8 | Y9 | Y10 | Y11 | Y12 | Y13 | Y14 | Y15 | Y16 | Y17 | Y18 |
| DHYLFFPGAK           | 2                                                 | 35 | 2  | 29 | 14 | 17 |    |     |     |     |     |     |     |     |     |     |
| LPGESELYSQR          | 10                                                | 14 | 13 | 7  | 21 | 6  | 30 |     |     |     |     |     |     |     |     |     |
| MQGLTAFDR            | 6                                                 | 8  | 8  | 18 | 5  | 56 |    |     |     |     |     |     |     |     |     |     |
| VAPPCAGGTCEAGTCAGAGR | 2                                                 | 11 | 6  | 7  | 3  | 11 | 8  | 11  | 6   | 4   | 7   | 16  | 8   |     |     |     |
| ILAEAEER             | 9                                                 | 9  | 82 |    |    |    |    |     |     |     |     |     |     |     |     |     |

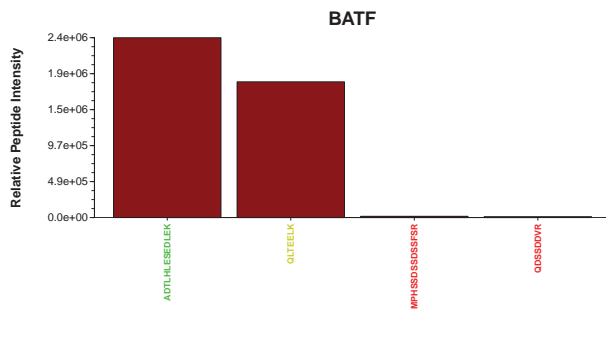

| Peptides     | Relative Contribution of Transition to Signal (%) |    |    |    |    |    |    |     |     |     |     |     |     |     |     |     |
|--------------|---------------------------------------------------|----|----|----|----|----|----|-----|-----|-----|-----|-----|-----|-----|-----|-----|
|              | Y3                                                | Y4 | Y5 | Y6 | Y7 | Y8 | Y9 | Y10 | Y11 | Y12 | Y13 | Y14 | Y15 | Y16 | Y17 | Y18 |
| ADTLHLESEDEK | 12                                                | 8  | 4  | 12 | 19 | 26 | 18 | 1   | 0   |     |     |     |     |     |     |     |
| QLTEELK      | 18                                                | 25 | 58 |    |    |    |    |     |     |     |     |     |     |     |     |     |

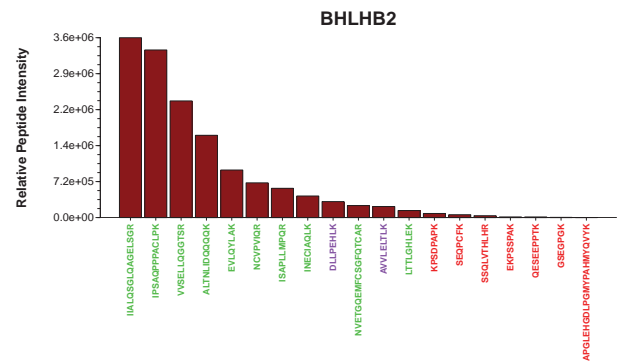

| Peptides           | Relative Contribution of Transition to Signal (%) |    |    |    |    |    |    |     |     |     |     |     |     |     |     |     |
|--------------------|---------------------------------------------------|----|----|----|----|----|----|-----|-----|-----|-----|-----|-----|-----|-----|-----|
|                    | Y3                                                | Y4 | Y5 | Y6 | Y7 | Y8 | Y9 | Y10 | Y11 | Y12 | Y13 | Y14 | Y15 | Y16 | Y17 | Y18 |
| ALTNLDQQQK         | 4                                                 | 5  | 9  | 34 | 31 | 7  | 5  | 4   |     |     |     |     |     |     |     |     |
| EVLGYLAK           | 9                                                 | 41 | 23 | 27 |    |    |    |     |     |     |     |     |     |     |     |     |
| IIALOSLQAGELSGR    | 8                                                 | 7  | 2  | 11 | 11 | 9  | 3  | 12  | 21  | 9   | 3   | 4   |     |     |     |     |
| INEGIAQLK          | 6                                                 | 28 | 14 | 20 | 32 |    |    |     |     |     |     |     |     |     |     |     |
| IPSAGPPACLPK       | 2                                                 | 2  | 0  | 4  | 12 | 72 | 1  | 2   | 4   |     |     |     |     |     |     |     |
| ISAPLLMPQR         | 17                                                | 20 | 22 | 7  | 22 | 6  |    |     |     |     |     |     |     |     |     |     |
| LTLGHLEK           | 7                                                 | 4  | 24 | 18 | 48 |    |    |     |     |     |     |     |     |     |     |     |
| NCVPIVQR           | 2                                                 | 1  | 80 | 16 |    |    |    |     |     |     |     |     |     |     |     |     |
| NVETGQEMFCSGFOTCAR | 7                                                 | 16 | 11 | 4  | 10 | 13 | 16 | 15  | 7   | 2   |     |     |     |     |     |     |
| VVSELOGGTSR        | 1                                                 | 3  | 25 | 20 | 17 | 8  | 3  | 23  |     |     |     |     |     |     |     |     |
| AVVLELTLK          | 3                                                 | 5  | 17 | 27 | 49 |    |    |     |     |     |     |     |     |     |     |     |
| DLLPEHLK           | 7                                                 | 1  | 75 | 16 |    |    |    |     |     |     |     |     |     |     |     |     |

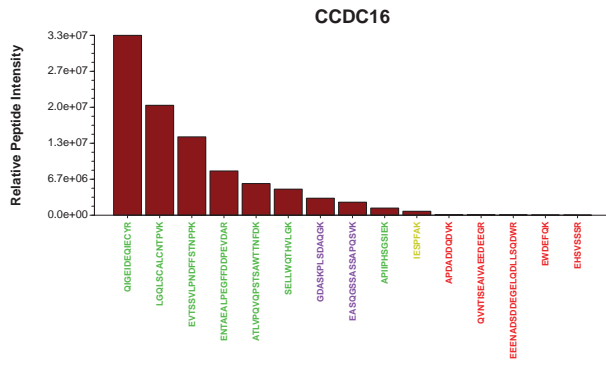

| Peptides            | Relative Contribution of Transition to Signal (%) |    |    |    |    |    |    |     |     |     |     |     |     |     |     |     |  |  |
|---------------------|---------------------------------------------------|----|----|----|----|----|----|-----|-----|-----|-----|-----|-----|-----|-----|-----|--|--|
|                     | Y3                                                | Y4 | Y5 | Y6 | Y7 | Y8 | Y9 | Y10 | Y11 | Y12 | Y13 | Y14 | Y15 | Y16 | Y17 | Y18 |  |  |
| APIPHSGSIEK         | 0                                                 | 1  | 3  | 7  | 5  | 71 | 8  | 4   |     |     |     |     |     |     |     |     |  |  |
| ATLWQVQVSTSAWTTNPK  | 5                                                 | 7  | 8  | 13 | 8  | 4  | 5  | 2   | 2   | 42  | 4   |     |     |     |     |     |  |  |
| ENTAEALPEGFDDPEVDAR | 6                                                 | 4  | 0  | 44 | 7  | 3  | 5  | 2   | 5   | 1   | 24  |     |     |     |     |     |  |  |
| EVTSSVLPNDFSTNPK    | 22                                                | 4  | 2  | 5  | 2  | 3  | 1  | 1   | 47  | 12  | 1   |     |     |     |     |     |  |  |
| LGQLSCALCNTPK       | 16                                                | 6  | 4  | 13 | 9  | 10 | 12 | 23  | 7   | 0   |     |     |     |     |     |     |  |  |
| QKDEIQECCR          | 10                                                | 20 | 11 | 8  | 11 | 21 | 9  | 1   | 10  |     |     |     |     |     |     |     |  |  |
| SELLWQTHVLGK        | 15                                                | 9  | 8  | 13 | 13 | 31 | 10 | 3   |     |     |     |     |     |     |     |     |  |  |
| IESPFAK             | 5                                                 | 15 | 80 |    |    |    |    |     |     |     |     |     |     |     |     |     |  |  |
| EASQGSASSAPQSVK     | 5                                                 | 1  | 29 | 8  | 8  | 15 | 8  | 9   | 5   | 11  | 0   | 0   |     |     |     |     |  |  |
| GDASKPLSDAQGK       | 3                                                 | 15 | 3  | 6  | 3  | 66 | 3  | 2   | 1   |     |     |     |     |     |     |     |  |  |

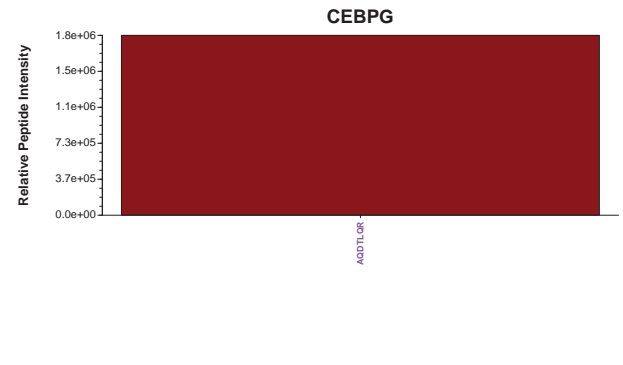

| Peptides | Relative Contribution of Transition to Signal (%) |    |    |    |    |    |    |     |     |     |     |     |     |     |     |     |  |  |
|----------|---------------------------------------------------|----|----|----|----|----|----|-----|-----|-----|-----|-----|-----|-----|-----|-----|--|--|
|          | Y3                                                | Y4 | Y5 | Y6 | Y7 | Y8 | Y9 | Y10 | Y11 | Y12 | Y13 | Y14 | Y15 | Y16 | Y17 | Y18 |  |  |
| AQDTLGR  | 22                                                | 78 |    |    |    |    |    |     |     |     |     |     |     |     |     |     |  |  |

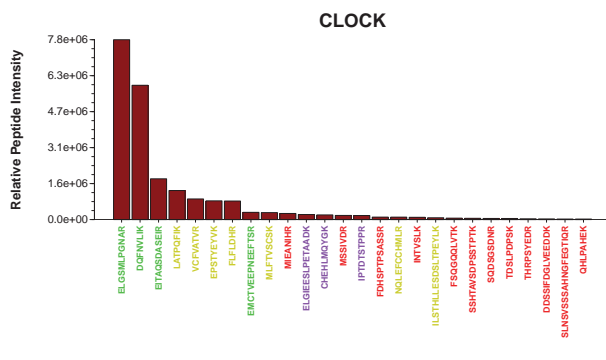

| Peptides           | Relative Contribution of Transition to Signal (%) |    |    |    |    |    |    |     |     |     |     |     |     |     |     |     |  |  |
|--------------------|---------------------------------------------------|----|----|----|----|----|----|-----|-----|-----|-----|-----|-----|-----|-----|-----|--|--|
|                    | Y3                                                | Y4 | Y5 | Y6 | Y7 | Y8 | Y9 | Y10 | Y11 | Y12 | Y13 | Y14 | Y15 | Y16 | Y17 | Y18 |  |  |
| DOFNVLK            | 13                                                | 7  | 17 | 63 |    |    |    |     |     |     |     |     |     |     |     |     |  |  |
| BTAGDSEIR          | 3                                                 | 7  | 12 | 9  | 29 | 16 | 10 | 14  |     |     |     |     |     |     |     |     |  |  |
| ELGMLPGNAR         | 0                                                 | 2  | 60 | 14 | 7  | 3  | 14 |     |     |     |     |     |     |     |     |     |  |  |
| EMCTVEEPNEEFTSR    | 5                                                 | 7  | 4  | 1  | 1  | 42 | 13 | 21  | 4   | 2   |     |     |     |     |     |     |  |  |
| EPSTVEYVK          | 12                                                | 22 | 36 | 10 | 20 |    |    |     |     |     |     |     |     |     |     |     |  |  |
| FLFLDHR            | 9                                                 | 19 | 72 |    |    |    |    |     |     |     |     |     |     |     |     |     |  |  |
| ILSTHLLSDSLTPPEYLK | 4                                                 | 20 | 34 | 13 | 1  | 4  | 3  | 6   | 8   | 5   |     |     |     |     |     |     |  |  |
| LATPQFK            | 7                                                 | 4  | 46 | 42 |    |    |    |     |     |     |     |     |     |     |     |     |  |  |
| MULTYSCSK          | 4                                                 | 17 | 12 | 24 | 43 |    |    |     |     |     |     |     |     |     |     |     |  |  |
| NQLFCCHMLR         | 9                                                 | 8  | 14 | 10 | 22 | 21 | 17 |     |     |     |     |     |     |     |     |     |  |  |
| VCFVATVR           | 4                                                 | 15 | 19 | 62 |    |    |    |     |     |     |     |     |     |     |     |     |  |  |
| CHEHLMQYK          | 4                                                 | 65 | 12 | 16 | 2  | 1  |    |     |     |     |     |     |     |     |     |     |  |  |
| ELGIESLPETAADK     | 5                                                 | 5  | 4  | 2  | 41 | 9  | 11 | 11  | 11  | 0   | 2   |     |     |     |     |     |  |  |
| IPDTSTPPR          | 20                                                | 9  | 9  | 19 | 18 | 26 |    |     |     |     |     |     |     |     |     |     |  |  |

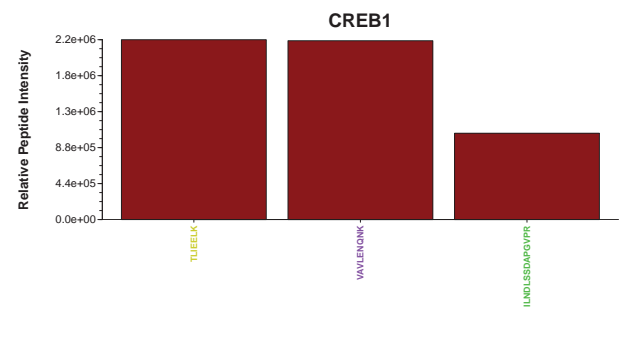

| Peptides     | Relative Contribution of Transition to Signal (%) |    |    |    |    |    |    |     |     |     |     |     |     |     |     |     |  |  |
|--------------|---------------------------------------------------|----|----|----|----|----|----|-----|-----|-----|-----|-----|-----|-----|-----|-----|--|--|
|              | Y3                                                | Y4 | Y5 | Y6 | Y7 | Y8 | Y9 | Y10 | Y11 | Y12 | Y13 | Y14 | Y15 | Y16 | Y17 | Y18 |  |  |
| ILNLLSDAPVPR | 1                                                 | 3  | 24 | 16 | 5  | 11 | 25 | 5   | 4   | 6   |     |     |     |     |     |     |  |  |
| TLIEELK      | 3                                                 | 13 | 85 |    |    |    |    |     |     |     |     |     |     |     |     |     |  |  |
| WAVLEGNK     | 2                                                 | 10 | 26 | 35 | 27 |    |    |     |     |     |     |     |     |     |     |     |  |  |

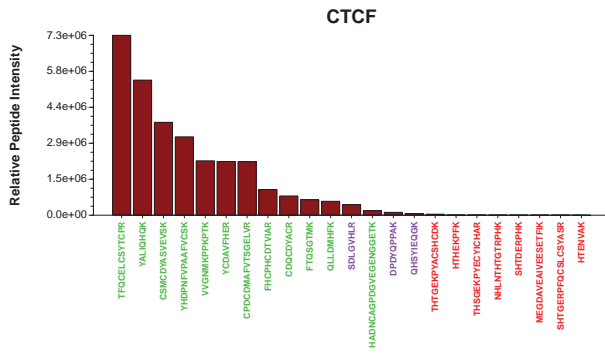

| Peptides            | Relative Contribution of Transition to Signal (%) |    |    |    |    |    |    |     |     |     |     |     |     |     |     |     |  |  |
|---------------------|---------------------------------------------------|----|----|----|----|----|----|-----|-----|-----|-----|-----|-----|-----|-----|-----|--|--|
|                     | Y3                                                | Y4 | Y5 | Y6 | Y7 | Y8 | Y9 | Y10 | Y11 | Y12 | Y13 | Y14 | Y15 | Y16 | Y17 | Y18 |  |  |
| CDQDVACR            | 23                                                | 23 | 19 | 24 | 11 |    |    |     |     |     |     |     |     |     |     |     |  |  |
| CPDCDMFYTSSELV      | 4                                                 | 1  | 5  | 9  | 22 | 16 | 17 | 13  | 7   | 4   | 1   |     |     |     |     |     |  |  |
| CSMCDVASVEVK        | 10                                                | 15 | 5  | 14 | 14 | 10 | 12 | 13  | 7   |     |     |     |     |     |     |     |  |  |
| FHCHPCHDTVIAR       | 3                                                 | 2  | 13 | 4  | 8  | 5  | 52 | 13  |     |     |     |     |     |     |     |     |  |  |
| FTSGSTMK            | 2                                                 | 8  | 33 | 56 |    |    |    |     |     |     |     |     |     |     |     |     |  |  |
| HADNCGAPDQVEGENGETK | 1                                                 | 4  | 14 | 14 | 2  | 15 | 13 | 1   | 20  | 1   | 5   | 9   | 2   |     |     |     |  |  |
| QLLDMHFK            | 10                                                | 28 | 29 | 33 |    |    |    |     |     |     |     |     |     |     |     |     |  |  |
| TFQELCSYTCPR        | 11                                                | 12 | 8  | 17 | 22 | 12 | 7  | 9   | 1   |     |     |     |     |     |     |     |  |  |
| VVGNMKPKPTK         | 21                                                | 3  | 3  | 46 | 9  | 5  | 1  | 13  |     |     |     |     |     |     |     |     |  |  |
| YALQIHK             | 15                                                | 18 | 31 | 36 |    |    |    |     |     |     |     |     |     |     |     |     |  |  |
| YCDVAFHER           | 9                                                 | 28 | 13 | 17 | 33 |    |    |     |     |     |     |     |     |     |     |     |  |  |
| YHDPNFVPAAFVCSK     | 10                                                | 7  | 5  | 3  | 1  | 39 | 6  | 2   | 1   | 21  | 4   |     |     |     |     |     |  |  |
| DPDYQPPAK           | 4                                                 | 59 | 8  | 12 | 17 |    |    |     |     |     |     |     |     |     |     |     |  |  |
| QHSYEEQK            | 13                                                | 16 | 14 | 10 | 47 |    |    |     |     |     |     |     |     |     |     |     |  |  |
| SDLGVHLR            | 20                                                | 9  | 56 | 15 |    |    |    |     |     |     |     |     |     |     |     |     |  |  |

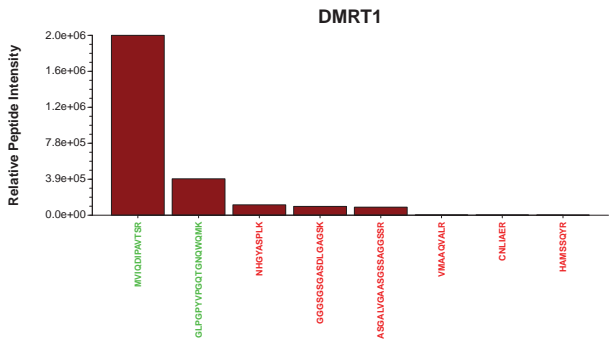

| Peptides           | Relative Contribution of Transition to Signal (%) |    |    |    |    |    |    |     |     |     |     |     |     |     |     |     |  |  |
|--------------------|---------------------------------------------------|----|----|----|----|----|----|-----|-----|-----|-----|-----|-----|-----|-----|-----|--|--|
|                    | Y3                                                | Y4 | Y5 | Y6 | Y7 | Y8 | Y9 | Y10 | Y11 | Y12 | Y13 | Y14 | Y15 | Y16 | Y17 | Y18 |  |  |
| GLPQPYVPGQTGNQWQMK | 3                                                 | 4  | 1  | 1  | 4  | 5  | 1  | 3   | 76  | 2   |     |     |     |     |     |     |  |  |
| MVIQDIPAVTGR       | 4                                                 | 1  | 2  | 46 | 9  | 21 | 12 | 6   |     |     |     |     |     |     |     |     |  |  |

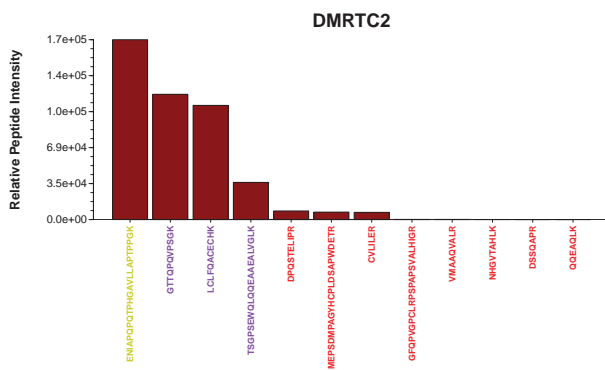

| Peptides             | Relative Contribution of Transition to Signal (%) |    |    |    |    |    |    |     |     |     |     |     |     |     |     |     |  |  |
|----------------------|---------------------------------------------------|----|----|----|----|----|----|-----|-----|-----|-----|-----|-----|-----|-----|-----|--|--|
|                      | Y3                                                | Y4 | Y5 | Y6 | Y7 | Y8 | Y9 | Y10 | Y11 | Y12 | Y13 | Y14 | Y15 | Y16 | Y17 | Y18 |  |  |
| ENAPQPTPHGAVLLAPTPPK | 6                                                 | 55 | 1  | 13 | 11 | 2  | 2  | 1   | 0   | 2   | 0   | 5   | 0   |     |     |     |  |  |
| GTTQPVPSK            | 3                                                 | 33 | 8  | 1  | 52 | 1  | 2  |     |     |     |     |     |     |     |     |     |  |  |
| LCLFAACEHK           | 9                                                 | 5  | 23 | 12 | 31 | 20 |    |     |     |     |     |     |     |     |     |     |  |  |
| TSQSEWQLGQEAALVGLK   | 24                                                | 13 | 8  | 7  | 3  | 3  | 7  | 7   | 5   | 8   | 11  | 4   |     |     |     |     |  |  |

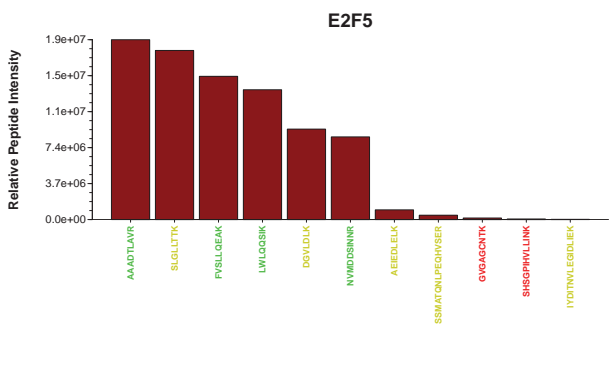

| Peptides        | Relative Contribution of Transition to Signal (%) |    |    |    |    |    |    |     |     |     |     |     |     |     |     |     |  |  |
|-----------------|---------------------------------------------------|----|----|----|----|----|----|-----|-----|-----|-----|-----|-----|-----|-----|-----|--|--|
|                 | Y3                                                | Y4 | Y5 | Y6 | Y7 | Y8 | Y9 | Y10 | Y11 | Y12 | Y13 | Y14 | Y15 | Y16 | Y17 | Y18 |  |  |
| AAADTLAVR       | 11                                                | 10 | 18 | 20 | 41 |    |    |     |     |     |     |     |     |     |     |     |  |  |
| FVSLLEAK        | 2                                                 | 5  | 11 | 6  | 77 |    |    |     |     |     |     |     |     |     |     |     |  |  |
| LWLQSK          | 4                                                 | 5  | 14 | 77 |    |    |    |     |     |     |     |     |     |     |     |     |  |  |
| NVMDSINNR       | 6                                                 | 3  | 12 | 10 | 20 | 49 |    |     |     |     |     |     |     |     |     |     |  |  |
| AEIELELK        | 3                                                 | 5  | 14 | 30 | 48 |    |    |     |     |     |     |     |     |     |     |     |  |  |
| DGVDLK          | 12                                                | 74 | 14 |    |    |    |    |     |     |     |     |     |     |     |     |     |  |  |
| IYDTNVLGDLIEK   | 3                                                 | 7  | 14 | 2  | 17 | 12 | 26 | 8   | 4   | 7   | 0   |     |     |     |     |     |  |  |
| SLGLTTK         | 4                                                 | 7  | 3  | 86 |    |    |    |     |     |     |     |     |     |     |     |     |  |  |
| SSMATONLPEQHYER | 10                                                | 4  | 7  | 6  | 1  | 54 | 8  | 8   | 1   | 0   |     |     |     |     |     |     |  |  |

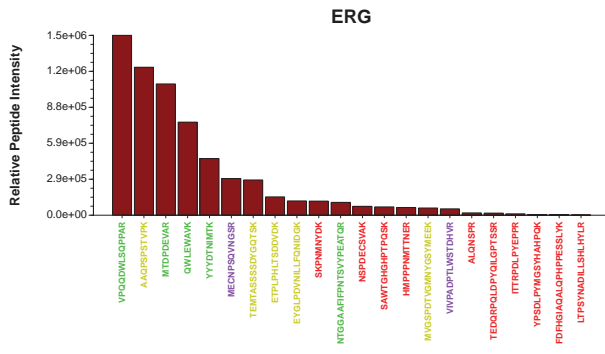

#### Relative Contribution of Transition to Signal (%)

| Peptides           | Y3 | Y4 | Y5 | Y6 | Y7 | Y8 | Y9 | Y10 | Y11 | Y12 | Y13 | Y14 | Y15 | Y16 | Y17 | Y18 |
|--------------------|----|----|----|----|----|----|----|-----|-----|-----|-----|-----|-----|-----|-----|-----|
| MTDPEVAR           | 4  | 10 | 5  | 57 | 24 |    |    |     |     |     |     |     |     |     |     |     |
| NTGGAFFPNTSVPEATOR | 5  | 5  | 1  | 31 | 15 | 2  | 4  | 1   | 0   | 37  |     |     |     |     |     |     |
| QWLEWAVK           | 15 | 30 | 27 | 28 |    |    |    |     |     |     |     |     |     |     |     |     |
| VPOQDWLSQPPAR      | 2  | 38 | 9  | 16 | 10 | 9  | 7  | 6   | 3   |     |     |     |     |     |     |     |
| YYTDNMTK           | 9  | 2  | 3  | 11 | 16 | 59 |    |     |     |     |     |     |     |     |     |     |
| AAQSPSTVVK         | 2  | 2  | 2  | 9  | 4  | 80 | 0  |     |     |     |     |     |     |     |     |     |
| ETPLHLTSDVDK       | 8  | 9  | 1  | 4  | 16 | 15 | 3  | 42  | 1   | 2   |     |     |     |     |     |     |
| EYGLPDVNIILFQNDGK  | 10 | 2  | 8  | 9  | 26 | 19 | 13 | 3   | 6   | 3   | 0   |     |     |     |     |     |
| MVSPPTVGMNYSYMEEK  | 2  | 6  | 11 | 4  | 18 | 12 | 18 | 5   | 21  | 4   |     |     |     |     |     |     |
| TEMTASSSDVGTSK     | 9  | 7  | 8  | 10 | 4  | 8  | 12 | 12  | 18  | 8   | 4   | 1   |     |     |     |     |
| MECNPSGVNSGR       | 6  | 16 | 10 | 5  | 5  | 42 | 11 | 5   |     |     |     |     |     |     |     |     |
| VIVPADPTLWSTDHVR   | 13 | 2  | 1  | 10 | 20 | 7  | 4  | 29  | 2   | 2   | 10  |     |     |     |     |     |

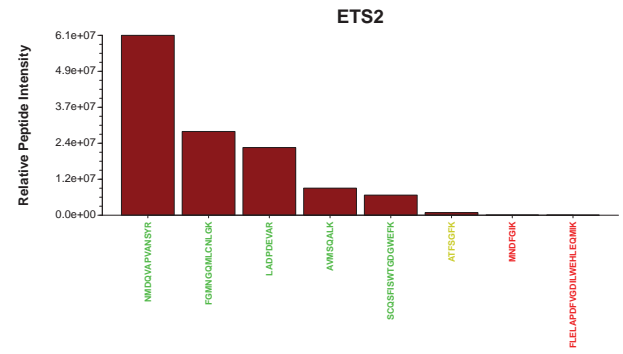

#### Relative Contribution of Transition to Signal (%)

| Peptides        | Y3 | Y4 | Y5 | Y6 | Y7 | Y8 | Y9 | Y10 | Y11 | Y12 | Y13 | Y14 | Y15 | Y16 | Y17 | Y18 |
|-----------------|----|----|----|----|----|----|----|-----|-----|-----|-----|-----|-----|-----|-----|-----|
| AMISQALK        | 3  | 2  | 20 | 75 |    |    |    |     |     |     |     |     |     |     |     |     |
| FGMNGMLCNLQK    | 8  | 12 | 20 | 17 | 18 | 3  | 12 | 8   | 1   |     |     |     |     |     |     |     |
| LADPEVAR        | 4  | 11 | 7  | 54 | 24 |    |    |     |     |     |     |     |     |     |     |     |
| NMDQVAPVANSYR   | 2  | 2  | 4  | 1  | 38 | 34 | 10 | 4   | 5   |     |     |     |     |     |     |     |
| SCGSFISWTGGWFEK | 5  | 3  | 13 | 2  | 13 | 15 | 10 | 27  | 10  | 2   |     |     |     |     |     |     |
| ATFSGFK         | 7  | 21 | 71 |    |    |    |    |     |     |     |     |     |     |     |     |     |

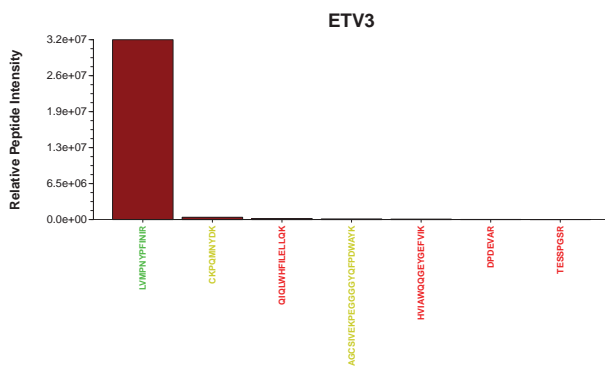

#### Relative Contribution of Transition to Signal (%)

| Peptides                | Y3 | Y4 | Y5 | Y6 | Y7 | Y8 | Y9 | Y10 | Y11 | Y12 | Y13 | Y14 | Y15 | Y16 | Y17 | Y18 |
|-------------------------|----|----|----|----|----|----|----|-----|-----|-----|-----|-----|-----|-----|-----|-----|
| LWMNYPFNIR              | 3  | 2  | 3  | 41 | 9  | 6  | 31 | 4   |     |     |     |     |     |     |     |     |
| AGCSIVEKPEGGGGYQFPDWAYK | 14 | 34 | 3  | 34 | 8  | 2  | 1  | 1   | 2   | 1   | 1   |     |     |     |     |     |
| CKPQMNYDK               | 3  | 4  | 8  | 2  | 84 |    |    |     |     |     |     |     |     |     |     |     |

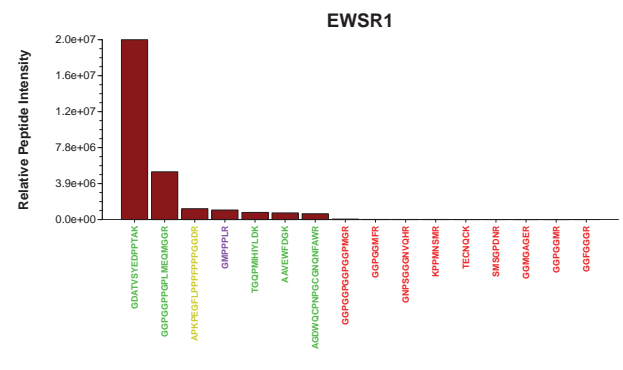

#### Relative Contribution of Transition to Signal (%)

| Peptides           | Y3 | Y4 | Y5 | Y6 | Y7 | Y8 | Y9 | Y10 | Y11 | Y12 | Y13 | Y14 | Y15 | Y16 | Y17 | Y18 |
|--------------------|----|----|----|----|----|----|----|-----|-----|-----|-----|-----|-----|-----|-----|-----|
| AAWVFDQK           | 8  | 11 | 34 | 29 | 19 |    |    |     |     |     |     |     |     |     |     |     |
| AGWVQCPNPGCGNQFAWR | 15 | 9  | 9  | 6  | 3  | 10 | 5  | 4   | 38  | 2   |     |     |     |     |     |     |
| GDATVSYEDPPTAK     | 1  | 6  | 56 | 3  | 4  | 6  | 20 | 4   | 1   | 0   |     |     |     |     |     |     |
| GGPGPPQLMEQMGGR    | 7  | 6  | 6  | 7  | 6  | 1  | 12 | 10  | 25  | 13  | 3   | 2   | 0   |     |     |     |
| TQPMHLYDK          | 5  | 13 | 6  | 15 | 6  | 4  | 51 | 0   |     |     |     |     |     |     |     |     |
| APKFEGLPPFPFGGDR   | 1  | 1  | 3  | 3  | 18 | 1  | 3  | 8   | 55  | 5   | 1   | 2   |     |     |     |     |
| GMPPPLR            | 12 | 30 | 58 |    |    |    |    |     |     |     |     |     |     |     |     |     |

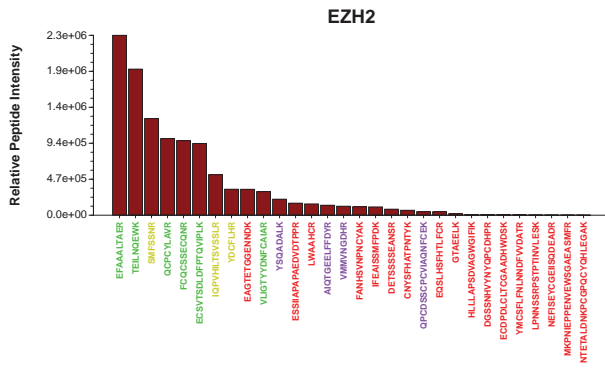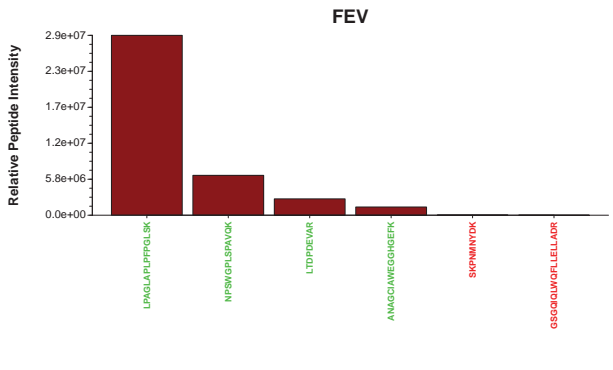

| Peptides            | Y3 | Y4 | Y5 | Y6 | Y7 | Y8 | Y9 | Y10 | Y11 | Y12 | Y13 | Y14 | Y15 | Y16 | Y17 | Y18 |
|---------------------|----|----|----|----|----|----|----|-----|-----|-----|-----|-----|-----|-----|-----|-----|
| ECSVTSLDLDFPTQVIPLK | 51 | 11 | 2  | 1  | 1  | 13 | 6  | 7   | 3   | 2   | 2   |     |     |     |     |     |
| EFAAALTAIR          | 6  | 21 | 23 | 23 | 13 | 14 |    |     |     |     |     |     |     |     |     |     |
| FCQCSSECONR         | 20 | 6  | 2  | 19 | 50 | 2  | 2  |     |     |     |     |     |     |     |     |     |
| QCPCYLAVR           | 10 | 10 | 11 | 7  | 61 |    |    |     |     |     |     |     |     |     |     |     |
| TELNQEWK            | 3  | 4  | 24 | 31 | 38 |    |    |     |     |     |     |     |     |     |     |     |
| VLGTTTQNFCAIAR      | 5  | 7  | 10 | 7  | 11 | 17 | 21 | 11  | 3   | 7   |     |     |     |     |     |     |
| IQPVHILTSVSSLR      | 2  | 3  | 13 | 4  | 10 | 23 | 13 | 11  | 2   | 19  |     |     |     |     |     |     |
| SMFSSNR             | 8  | 2  | 90 |    |    |    |    |     |     |     |     |     |     |     |     |     |
| YDCFLHR             | 26 | 31 | 43 |    |    |    |    |     |     |     |     |     |     |     |     |     |
| AIQTGEELFFDYR       | 10 | 15 | 22 | 12 | 9  | 3  | 13 | 16  | 1   |     |     |     |     |     |     |     |
| QCPCSSCPVIAGNFCKE   | 6  | 11 | 19 | 7  | 31 | 12 | 4  | 1   | 10  |     |     |     |     |     |     |     |
| VMMVNGDHR           | 2  | 12 | 27 | 28 | 31 |    |    |     |     |     |     |     |     |     |     |     |
| YSGADALK            | 15 | 11 | 33 | 41 |    |    |    |     |     |     |     |     |     |     |     |     |

| Peptides        | Y3 | Y4 | Y5 | Y6 | Y7 | Y8 | Y9 | Y10 | Y11 | Y12 | Y13 | Y14 | Y15 | Y16 | Y17 | Y18 |
|-----------------|----|----|----|----|----|----|----|-----|-----|-----|-----|-----|-----|-----|-----|-----|
| ANAGCIWEGGHGFEK | 1  | 10 | 4  | 3  | 17 | 11 | 18 | 24  | 7   | 2   | 1   |     |     |     |     |     |
| LPAGLAPFPQLSK   | 1  | 1  | 23 | 1  | 14 | 1  | 36 | 14  | 1   | 3   | 3   |     |     |     |     |     |
| LTDPEVAR        | 4  | 10 | 6  | 54 | 25 |    |    |     |     |     |     |     |     |     |     |     |
| NPSWGPLSPAVOK   | 3  | 1  | 22 | 8  | 1  | 18 | 33 | 10  | 4   |     |     |     |     |     |     |     |

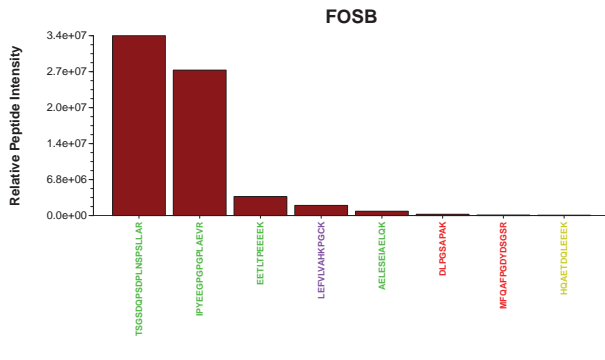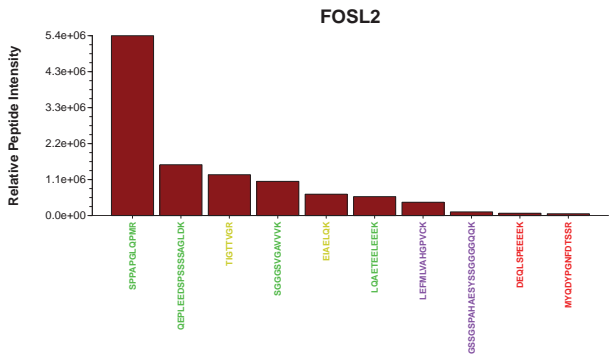

| Peptides          | Y3 | Y4 | Y5 | Y6 | Y7 | Y8 | Y9 | Y10 | Y11 | Y12 | Y13 | Y14 | Y15 | Y16 | Y17 | Y18 |
|-------------------|----|----|----|----|----|----|----|-----|-----|-----|-----|-----|-----|-----|-----|-----|
| AELSEIAELQK       | 9  | 11 | 19 | 12 | 7  | 24 | 11 | 7   |     |     |     |     |     |     |     |     |
| EETLTPEEEK        | 1  | 4  | 2  | 58 | 23 | 5  | 7  |     |     |     |     |     |     |     |     |     |
| IPVEEGQPGPLAEVR   | 3  | 4  | 1  | 5  | 2  | 12 | 4  | 25  | 10  | 5   | 4   |     |     |     |     |     |
| TSGSDQSPDLNPSLLAR | 5  | 2  | 3  | 14 | 11 | 8  | 1  | 35  | 3   | 2   | 17  | 0   |     |     |     |     |
| HQAETDQLEEEK      | 8  | 8  | 8  | 13 | 5  | 7  | 11 | 40  |     |     |     |     |     |     |     |     |
| LEFLVAHPGCK       | 2  | 41 | 9  | 9  | 15 | 11 | 9  | 2   | 1   |     |     |     |     |     |     |     |

| Peptides            | Y3 | Y4 | Y5 | Y6 | Y7 | Y8 | Y9 | Y10 | Y11 | Y12 | Y13 | Y14 | Y15 | Y16 | Y17 | Y18 |
|---------------------|----|----|----|----|----|----|----|-----|-----|-----|-----|-----|-----|-----|-----|-----|
| LOAETEELQK          | 4  | 7  | 6  | 6  | 6  | 14 | 11 | 47  |     |     |     |     |     |     |     |     |
| QPLEEDSPSSSAGLDK    | 2  | 12 | 6  | 6  | 5  | 3  | 3  | 24  | 16  | 10  | 9   | 4   |     |     |     |     |
| SGGSGVAVVK          | 5  | 4  | 3  | 48 | 17 | 8  | 6  | 9   |     |     |     |     |     |     |     |     |
| SPPAPQPMR           | 5  | 2  | 1  | 3  | 37 | 6  | 45 |     |     |     |     |     |     |     |     |     |
| EIAELQK             | 29 | 22 | 49 |    |    |    |    |     |     |     |     |     |     |     |     |     |
| TGTTVGR             | 2  | 5  | 4  | 90 |    |    |    |     |     |     |     |     |     |     |     |     |
| GSSGSPAAHAEYSGGGGQK | 2  | 7  | 7  | 9  | 12 | 13 | 12 |     | 15  | 7   | 12  | 4   | 1   |     |     |     |
| LEFLVAHPGCK         | 1  | 11 | 25 | 16 | 17 | 14 | 9  | 4   | 3   |     |     |     |     |     |     |     |

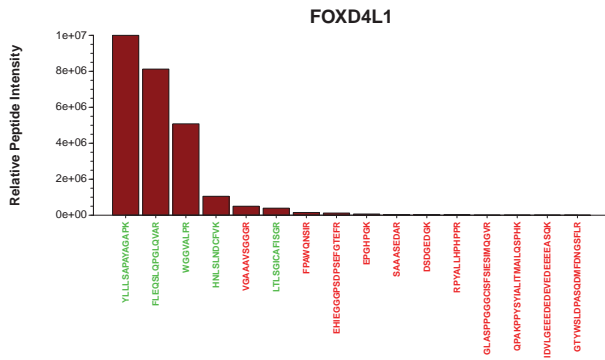

| Peptides       | Relative Contribution of Transition to Signal (%) |    |    |    |    |    |    |     |     |     |     |     |     |     |     |     |
|----------------|---------------------------------------------------|----|----|----|----|----|----|-----|-----|-----|-----|-----|-----|-----|-----|-----|
|                | Y3                                                | Y4 | Y5 | Y6 | Y7 | Y8 | Y9 | Y10 | Y11 | Y12 | Y13 | Y14 | Y15 | Y16 | Y17 | Y18 |
| FLEGLDPQLQIAR  | 3                                                 | 4  | 2  | 2  | 58 | 14 | 6  | 8   | 2   | 1   |     |     |     |     |     |     |
| HNLSDNCFVK     | 3                                                 | 20 | 5  | 8  | 7  | 28 | 31 |     |     |     |     |     |     |     |     |     |
| LTLSDGICAFISGR | 10                                                | 7  | 7  | 7  | 25 | 7  | 14 | 17  | 5   |     |     |     |     |     |     |     |
| WGGVALPR       | 9                                                 | 51 | 11 | 29 |    |    |    |     |     |     |     |     |     |     |     |     |
| YLLSAPVYAGAK   | 1                                                 | 3  | 2  | 1  | 1  | 30 | 11 | 29  | 14  | 8   |     |     |     |     |     |     |

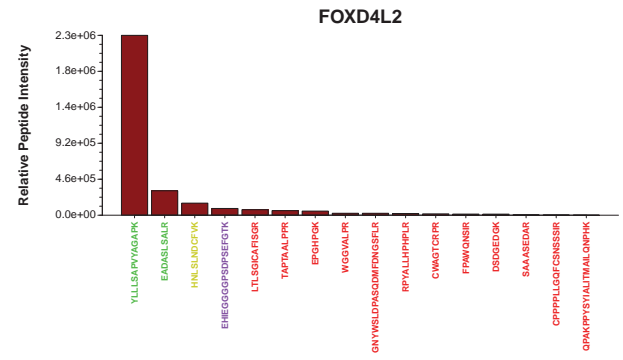

| Peptides         | Relative Contribution of Transition to Signal (%) |    |    |    |    |    |    |     |     |     |     |     |     |     |     |     |
|------------------|---------------------------------------------------|----|----|----|----|----|----|-----|-----|-----|-----|-----|-----|-----|-----|-----|
|                  | Y3                                                | Y4 | Y5 | Y6 | Y7 | Y8 | Y9 | Y10 | Y11 | Y12 | Y13 | Y14 | Y15 | Y16 | Y17 | Y18 |
| EADLSALR         | 8                                                 | 31 | 18 | 26 | 7  | 11 |    |     |     |     |     |     |     |     |     |     |
| YLLSAPVYAGAK     | 1                                                 | 4  | 3  | 3  | 1  | 27 | 11 | 28  | 14  | 8   |     |     |     |     |     |     |
| HNLSDNCFVK       | 6                                                 | 20 | 5  | 7  | 5  | 23 | 34 |     |     |     |     |     |     |     |     |     |
| EHEGGGGPSPSEFOTK | 8                                                 | 12 | 4  | 1  | 46 | 3  | 1  | 6   | 3   | 5   | 1   | 6   | 3   |     |     |     |

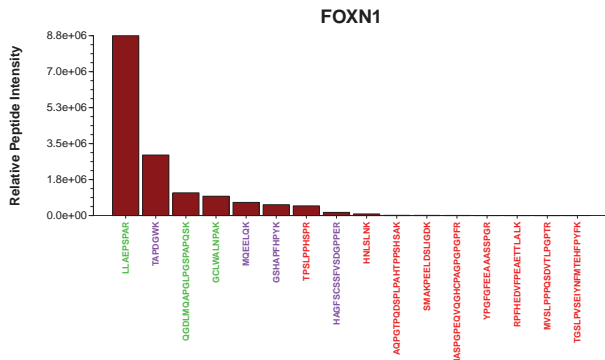

| Peptides           | Relative Contribution of Transition to Signal (%) |    |    |    |    |    |    |     |     |     |     |     |     |     |     |     |
|--------------------|---------------------------------------------------|----|----|----|----|----|----|-----|-----|-----|-----|-----|-----|-----|-----|-----|
|                    | Y3                                                | Y4 | Y5 | Y6 | Y7 | Y8 | Y9 | Y10 | Y11 | Y12 | Y13 | Y14 | Y15 | Y16 | Y17 | Y18 |
| GGLWLNPAK          | 14                                                | 10 | 12 | 22 | 29 | 13 |    |     |     |     |     |     |     |     |     |     |
| LLAEPSPAR          | 2                                                 | 1  | 51 | 8  | 39 |    |    |     |     |     |     |     |     |     |     |     |
| GGLLMQAPLPGSPAPOSK | 0                                                 | 13 | 1  | 8  | 1  | 1  | 32 | 1   | 2   | 34  | 7   | 1   | 0   |     |     |     |
| GSHAFPHYK          | 24                                                | 10 | 2  | 45 | 18 | 1  |    |     |     |     |     |     |     |     |     |     |
| HAGFSCSFVSDGPPER   | 1                                                 | 3  | 74 | 1  | 6  | 3  | 3  | 4   | 3   | 2   | 1   |     |     |     |     |     |
| MOEELQK            | 8                                                 | 11 | 80 |    |    |    |    |     |     |     |     |     |     |     |     |     |
| TAPDGWK            | 8                                                 | 6  | 86 |    |    |    |    |     |     |     |     |     |     |     |     |     |

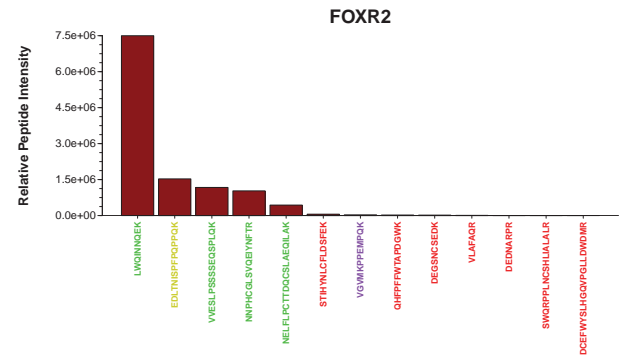

| Peptides             | Relative Contribution of Transition to Signal (%) |    |    |    |    |    |    |     |     |     |     |     |     |     |     |     |
|----------------------|---------------------------------------------------|----|----|----|----|----|----|-----|-----|-----|-----|-----|-----|-----|-----|-----|
|                      | Y3                                                | Y4 | Y5 | Y6 | Y7 | Y8 | Y9 | Y10 | Y11 | Y12 | Y13 | Y14 | Y15 | Y16 | Y17 | Y18 |
| LWQINDEK             | 1                                                 | 5  | 19 | 30 | 44 |    |    |     |     |     |     |     |     |     |     |     |
| NELFLPCTDQCSLAEQILAK | 18                                                | 12 | 23 | 8  | 12 | 4  | 6  | 6   | 5   | 4   | 2   |     |     |     |     |     |
| NIPKCELVQEIYFTR      | 4                                                 | 12 | 16 | 9  | 7  | 13 | 7  | 21  | 2   | 10  |     |     |     |     |     |     |
| VVESLPSSSEGSFLQK     | 1                                                 | 15 | 8  | 2  | 2  | 3  | 4  | 3   | 2   | 58  | 1   | 1   |     |     |     |     |
| EDLNIISPFPPQPK       | 3                                                 | 30 | 1  | 8  | 2  | 21 | 29 | 3   | 3   | 1   | 0   |     |     |     |     |     |
| VGMKPPMPQK           | 6                                                 | 9  | 0  | 5  | 64 | 6  | 6  | 3   |     |     |     |     |     |     |     |     |



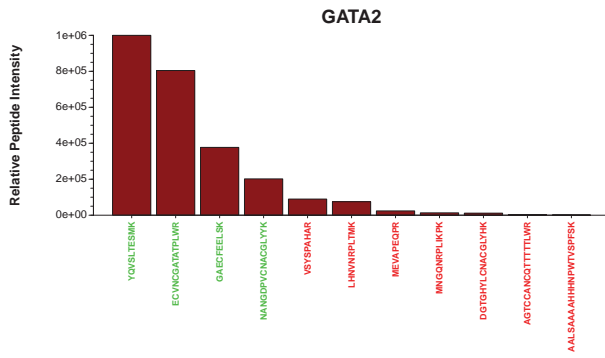

| Peptides         | Relative Contribution of Transition to Signal (%) |    |    |    |    |    |    |     |     |     |     |     |     |     |     |     |
|------------------|---------------------------------------------------|----|----|----|----|----|----|-----|-----|-----|-----|-----|-----|-----|-----|-----|
|                  | Y3                                                | Y4 | Y5 | Y6 | Y7 | Y8 | Y9 | Y10 | Y11 | Y12 | Y13 | Y14 | Y15 | Y16 | Y17 | Y18 |
| ECVNCGATPLWR     | 1                                                 | 33 | 11 | 9  | 13 | 4  | 14 | 6   | 7   | 2   |     |     |     |     |     |     |
| GAECFEELSK       | 12                                                | 15 | 19 | 27 | 20 | 7  |    |     |     |     |     |     |     |     |     |     |
| NANGDPVCNACGLYYK | 20                                                | 2  | 8  | 10 | 6  | 7  | 16 | 2   | 28  | 1   |     |     |     |     |     |     |
| YQVSLTESMK       | 7                                                 | 4  | 8  | 5  | 29 | 47 |    |     |     |     |     |     |     |     |     |     |

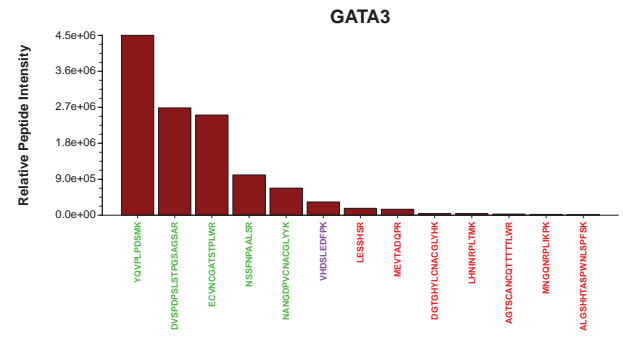

| Peptides          | Relative Contribution of Transition to Signal (%) |    |    |    |    |    |    |     |     |     |     |     |     |     |     |     |
|-------------------|---------------------------------------------------|----|----|----|----|----|----|-----|-----|-----|-----|-----|-----|-----|-----|-----|
|                   | Y3                                                | Y4 | Y5 | Y6 | Y7 | Y8 | Y9 | Y10 | Y11 | Y12 | Y13 | Y14 | Y15 | Y16 | Y17 | Y18 |
| DVSPDPSLSTPGASGAR | 1                                                 | 4  | 3  | 1  | 2  | 34 | 9  | 21  | 5   | 3   | 15  | 1   | 2   | 0   |     |     |
| ECVNCGATPLWR      | 1                                                 | 31 | 7  | 10 | 15 | 4  | 16 | 7   | 7   | 3   |     |     |     |     |     |     |
| NANGDPVCNACGLYYK  | 16                                                | 3  | 10 | 8  | 7  | 8  | 17 | 2   | 28  | 1   |     |     |     |     |     |     |
| NSSFNPAALSR       | 4                                                 | 6  | 3  | 42 | 18 | 12 | 14 |     |     |     |     |     |     |     |     |     |
| YQVPLPDSMK        | 4                                                 | 1  | 20 | 2  | 54 | 19 |    |     |     |     |     |     |     |     |     |     |
| VHSLEDFPK         | 21                                                | 8  | 3  | 3  | 12 | 53 |    |     |     |     |     |     |     |     |     |     |

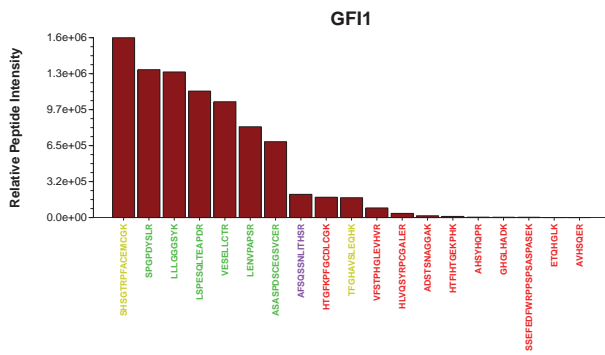

| Peptides       | Relative Contribution of Transition to Signal (%) |    |    |    |    |    |    |     |     |     |     |     |     |     |     |     |
|----------------|---------------------------------------------------|----|----|----|----|----|----|-----|-----|-----|-----|-----|-----|-----|-----|-----|
|                | Y3                                                | Y4 | Y5 | Y6 | Y7 | Y8 | Y9 | Y10 | Y11 | Y12 | Y13 | Y14 | Y15 | Y16 | Y17 | Y18 |
| ASASPSDCEGSVCR | 11                                                | 7  | 5  | 17 | 7  | 6  | 14 | 5   | 24  | 2   | 0   |     |     |     |     |     |
| LENVPASR       | 2                                                 | 2  | 81 | 3  | 12 |    |    |     |     |     |     |     |     |     |     |     |
| LLLGGGSYK      | 1                                                 |    |    | 4  | 27 | 68 |    |     |     |     |     |     |     |     |     |     |
| LSPESQLTEAPDR  | 12                                                | 19 | 8  | 19 | 11 | 4  | 17 | 4   | 5   |     |     |     |     |     |     |     |
| SPFGDYSLR      | 8                                                 | 22 | 15 | 18 | 38 |    |    |     |     |     |     |     |     |     |     |     |
| VESELLCTR      | 12                                                | 20 | 15 | 5  | 49 |    |    |     |     |     |     |     |     |     |     |     |
| SHSOTRPFACMCKG | 6                                                 | 2  | 87 | 3  | 0  | 0  | 0  | 0   | 0   | 0   | 0   |     |     |     |     |     |
| TFGHAVSLQHK    | 4                                                 | 8  | 6  | 22 | 22 | 30 | 2  | 8   |     |     |     |     |     |     |     |     |
| AFSQSSNLITSR   | 9                                                 | 28 | 15 | 3  | 5  | 11 | 23 | 2   | 5   |     |     |     |     |     |     |     |

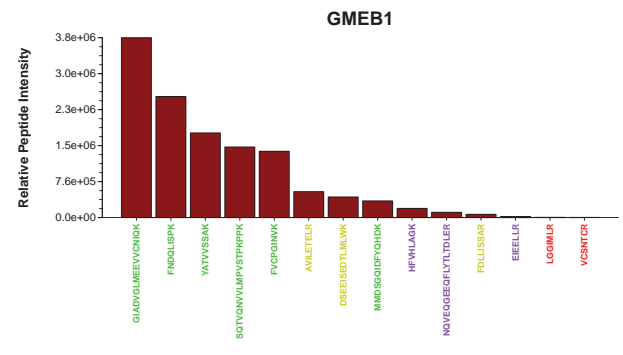

| Peptides           | Relative Contribution of Transition to Signal (%) |    |    |    |    |    |    |     |     |     |     |     |     |     |     |     |
|--------------------|---------------------------------------------------|----|----|----|----|----|----|-----|-----|-----|-----|-----|-----|-----|-----|-----|
|                    | Y3                                                | Y4 | Y5 | Y6 | Y7 | Y8 | Y9 | Y10 | Y11 | Y12 | Y13 | Y14 | Y15 | Y16 | Y17 | Y18 |
| FNDQLSPK           | 47                                                | 10 | 9  | 6  | 28 |    |    |     |     |     |     |     |     |     |     |     |
| FYCRGINK           | 4                                                 | 3  | 4  | 56 | 32 |    |    |     |     |     |     |     |     |     |     |     |
| GIADVGLMEEVCNIQK   | 5                                                 | 10 | 20 | 15 | 8  | 8  | 13 | 13  | 2   | 7   |     |     |     |     |     |     |
| MMDSGQIDFYQNDK     | 12                                                | 7  | 11 | 15 | 26 | 15 | 3  | 6   | 4   | 2   |     |     |     |     |     |     |
| SQTQNVLMVSTPKPK    | 18                                                | 1  | 6  | 2  | 3  | 1  | 27 | 12  | 13  | 15  | 2   |     |     |     |     |     |
| YATVSSAK           | 3                                                 | 10 | 24 | 13 | 50 |    |    |     |     |     |     |     |     |     |     |     |
| AVILETLR           | 2                                                 | 7  | 36 | 31 | 24 |    |    |     |     |     |     |     |     |     |     |     |
| DSEIESEDTLMLWK     | 12                                                | 12 | 4  | 4  | 8  | 7  | 41 | 9   | 3   | 0   |     |     |     |     |     |     |
| FOLLISSAR          | 1                                                 | 17 | 46 | 20 | 16 |    |    |     |     |     |     |     |     |     |     |     |
| EIEELLR            | 13                                                | 41 | 46 |    |    |    |    |     |     |     |     |     |     |     |     |     |
| HFWHLGAK           | 25                                                | 17 | 15 | 43 |    |    |    |     |     |     |     |     |     |     |     |     |
| NQVEQEGEEFLYTLTLER | 8                                                 | 7  | 15 | 11 | 19 | 20 | 10 | 8   | 2   |     |     |     |     |     |     |     |

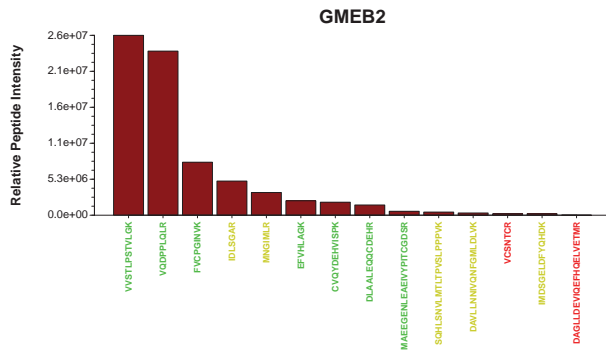

| Peptides            | Relative Contribution of Transition to Signal (%) |    |    |    |    |    |    |     |     |     |     |     |     |     |     |     |  |  |
|---------------------|---------------------------------------------------|----|----|----|----|----|----|-----|-----|-----|-----|-----|-----|-----|-----|-----|--|--|
|                     | Y3                                                | Y4 | Y5 | Y6 | Y7 | Y8 | Y9 | Y10 | Y11 | Y12 | Y13 | Y14 | Y15 | Y16 | Y17 | Y18 |  |  |
| CVQYDEIVSFK         | 32                                                | 9  | 5  | 6  | 7  | 12 | 17 | 13  |     |     |     |     |     |     |     |     |  |  |
| DLAALGQCDHR         | 10                                                | 6  | 13 | 11 | 14 | 26 | 12 | 6   | 2   |     |     |     |     |     |     |     |  |  |
| EFVHLGAK            | 24                                                | 27 | 28 | 20 |    |    |    |     |     |     |     |     |     |     |     |     |  |  |
| FVCPGIVNK           | 6                                                 | 6  | 8  | 48 | 33 |    |    |     |     |     |     |     |     |     |     |     |  |  |
| MAEEGENLEAEVYPTGDSR | 0                                                 | 3  | 4  | 7  | 1  | 43 | 23 | 10  | 4   | 2   | 2   |     |     |     |     |     |  |  |
| VQDFPLQLR           | 2                                                 | 1  | 8  | 72 | 16 |    |    |     |     |     |     |     |     |     |     |     |  |  |
| VVSTLPSTVLGK        | 4                                                 | 2  | 1  | 1  | 49 | 5  | 4  | 33  |     |     |     |     |     |     |     |     |  |  |
| DANLNNVONFGMLDLVK   | 7                                                 | 17 | 9  | 4  | 13 | 6  | 9  | 9   | 20  | 4   | 2   |     |     |     |     |     |  |  |
| ILDSGAR             | 10                                                | 29 | 61 |    |    |    |    |     |     |     |     |     |     |     |     |     |  |  |
| IMDSGELDFYQHK       | 18                                                | 5  | 10 | 16 | 17 | 12 | 3  | 8   | 6   | 6   |     |     |     |     |     |     |  |  |
| MNGIMLR             | 36                                                | 8  | 57 |    |    |    |    |     |     |     |     |     |     |     |     |     |  |  |
| SOHLSNVLMTLPVSLPPVK | 3                                                 | 14 | 48 | 3  | 2  | 0  | 8  | 7   | 3   | 5   | 3   | 2   |     |     |     |     |  |  |

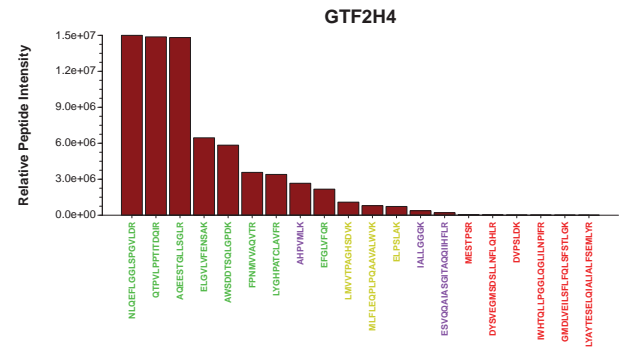

| Peptides             | Relative Contribution of Transition to Signal (%) |    |    |    |    |    |    |     |     |     |     |     |     |     |     |     |  |  |
|----------------------|---------------------------------------------------|----|----|----|----|----|----|-----|-----|-----|-----|-----|-----|-----|-----|-----|--|--|
|                      | Y3                                                | Y4 | Y5 | Y6 | Y7 | Y8 | Y9 | Y10 | Y11 | Y12 | Y13 | Y14 | Y15 | Y16 | Y17 | Y18 |  |  |
| AGEESTLGLSLR         | 6                                                 | 13 | 11 | 3  | 13 | 9  | 15 | 10  | 10  |     |     |     |     |     |     |     |  |  |
| AWSDTSQLGPK          | 7                                                 | 23 | 8  | 2  | 7  | 6  | 6  | 7   | 34  |     |     |     |     |     |     |     |  |  |
| EFGLVFOR             | 28                                                | 43 | 4  | 25 |    |    |    |     |     |     |     |     |     |     |     |     |  |  |
| ELGVLVFNLSAK         | 2                                                 | 5  | 5  | 25 | 22 | 29 | 2  | 10  |     |     |     |     |     |     |     |     |  |  |
| PFMIVVAQVTR          | 2                                                 | 5  | 17 | 32 | 20 | 9  | 14 |     |     |     |     |     |     |     |     |     |  |  |
| LYGHPTCLAVFR         | 2                                                 | 2  | 2  | 4  | 5  | 80 | 1  | 3   |     |     |     |     |     |     |     |     |  |  |
| NLQDFLGGLSFGLVLR     | 5                                                 | 1  | 1  | 21 | 16 | 3  | 8  | 26  | 10  | 5   | 3   | 0   |     |     |     |     |  |  |
| QTPVLPPTTIDQIR       | 5                                                 | 1  | 2  | 1  | 2  | 6  | 69 | 5   | 1   | 8   |     |     |     |     |     |     |  |  |
| ELPSLAK              | 4                                                 | 21 | 75 |    |    |    |    |     |     |     |     |     |     |     |     |     |  |  |
| LMVYTPAGHSQVK        | 1                                                 | 3  | 2  | 4  | 3  | 43 | 22 | 14  | 9   |     |     |     |     |     |     |     |  |  |
| MLFLEQPLQAALVVK      | 2                                                 | 1  | 4  | 2  | 1  | 2  | 1  | 28  | 3   | 54  | 2   |     |     |     |     |     |  |  |
| AHPVMLK              | 9                                                 | 3  | 88 |    |    |    |    |     |     |     |     |     |     |     |     |     |  |  |
| ESVGDAAISGITAGIHFRLR | 8                                                 | 26 | 13 | 3  | 6  | 6  | 7  | 15  | 1   | 7   | 9   |     |     |     |     |     |  |  |
| IALLGGK              | 2                                                 | 18 | 21 | 58 |    |    |    |     |     |     |     |     |     |     |     |     |  |  |

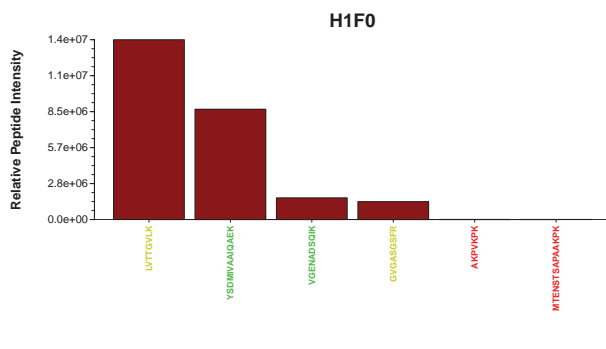

| Peptides      | Relative Contribution of Transition to Signal (%) |    |    |    |    |    |    |     |     |     |     |     |     |     |     |     |  |  |
|---------------|---------------------------------------------------|----|----|----|----|----|----|-----|-----|-----|-----|-----|-----|-----|-----|-----|--|--|
|               | Y3                                                | Y4 | Y5 | Y6 | Y7 | Y8 | Y9 | Y10 | Y11 | Y12 | Y13 | Y14 | Y15 | Y16 | Y17 | Y18 |  |  |
| VGENADSQIK    | 4                                                 | 20 | 27 | 18 | 24 | 8  |    |     |     |     |     |     |     |     |     |     |  |  |
| YSDMVAIAIQAEK | 5                                                 | 6  | 7  | 10 | 21 | 35 | 10 | 2   | 3   |     |     |     |     |     |     |     |  |  |
| GVGASGSR      | 2                                                 | 10 | 26 | 5  | 57 |    |    |     |     |     |     |     |     |     |     |     |  |  |
| LVTTOVLK      | 4                                                 | 4  | 5  | 86 |    |    |    |     |     |     |     |     |     |     |     |     |  |  |

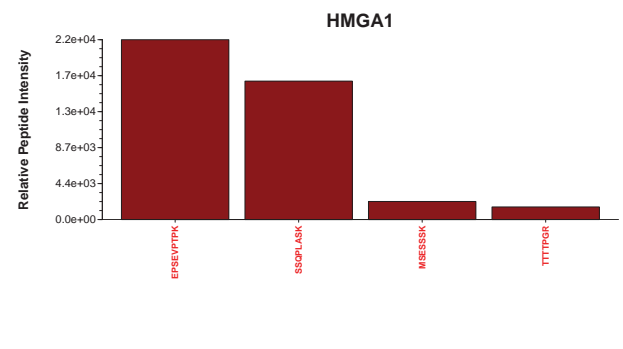

| Peptides  | Relative Contribution of Transition to Signal (%) |    |    |    |    |    |    |     |     |     |     |     |     |     |     |     |  |  |
|-----------|---------------------------------------------------|----|----|----|----|----|----|-----|-----|-----|-----|-----|-----|-----|-----|-----|--|--|
|           | Y3                                                | Y4 | Y5 | Y6 | Y7 | Y8 | Y9 | Y10 | Y11 | Y12 | Y13 | Y14 | Y15 | Y16 | Y17 | Y18 |  |  |
| EPSEVPTPK |                                                   |    |    |    |    |    |    |     |     |     |     |     |     |     |     |     |  |  |
| SGQPLAK   |                                                   |    |    |    |    |    |    |     |     |     |     |     |     |     |     |     |  |  |
| MSESSSK   |                                                   |    |    |    |    |    |    |     |     |     |     |     |     |     |     |     |  |  |
| TTTTPKR   |                                                   |    |    |    |    |    |    |     |     |     |     |     |     |     |     |     |  |  |

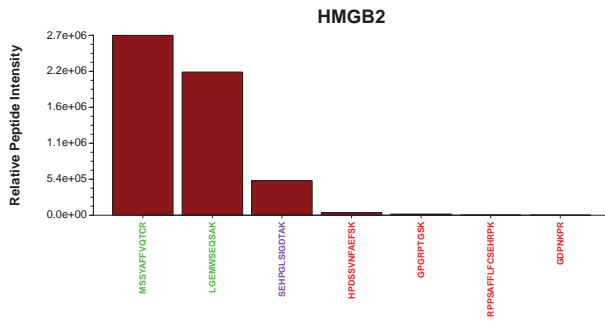

Relative Contribution of Transition to Signal (%)

| Peptides      | Y3 | Y4 | Y5 | Y6 | Y7 | Y8 | Y9 | Y10 | Y11 | Y12 | Y13 | Y14 | Y15 | Y16 | Y17 | Y18 |
|---------------|----|----|----|----|----|----|----|-----|-----|-----|-----|-----|-----|-----|-----|-----|
| LGEIMNSEQSAK  | 7  | 5  | 7  | 33 | 31 | 14 | 3  |     |     |     |     |     |     |     |     |     |
| MSSYAFFVQTCR  | 7  | 14 | 15 | 21 | 24 | 14 | 3  | 3   |     |     |     |     |     |     |     |     |
| SEHPQLSIGDTAK | 8  | 1  | 7  | 3  | 6  | 2  | 8  | 64  | 1   |     |     |     |     |     |     |     |

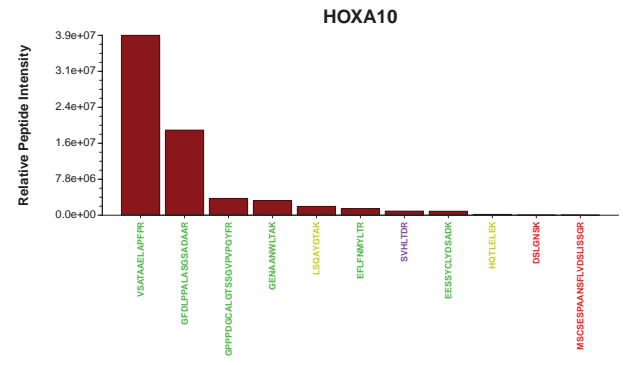

Relative Contribution of Transition to Signal (%)

| Peptides             | Y3 | Y4 | Y5 | Y6 | Y7 | Y8 | Y9 | Y10 | Y11 | Y12 | Y13 | Y14 | Y15 | Y16 | Y17 | Y18 |
|----------------------|----|----|----|----|----|----|----|-----|-----|-----|-----|-----|-----|-----|-----|-----|
| EESSYCLYDSADK        | 3  | 12 | 15 | 19 | 13 | 22 | 7  | 3   | 6   |     |     |     |     |     |     |     |
| EFLFMVLTAR           | 9  | 17 | 13 | 26 | 23 | 12 |    |     |     |     |     |     |     |     |     |     |
| GENANWLTAK           | 17 | 8  | 9  | 17 | 27 | 10 | 11 |     |     |     |     |     |     |     |     |     |
| GFELPPALASGADAAR     | 8  | 1  | 1  | 1  | 5  | 10 | 14 | 6   | 4   | 17  | 34  | 0   | 0   |     |     |     |
| GPPPDGALGTSSQVPPGYFR | 1  | 2  | 39 | 1  | 31 | 2  | 4  | 3   | 4   | 2   | 9   | 2   |     |     |     |     |
| VSMIAELAPFPR         | 1  | 26 | 19 | 12 | 11 | 17 | 9  | 4   | 2   |     |     |     |     |     |     |     |
| HQTLELEK             | 23 | 9  | 8  | 60 |    |    |    |     |     |     |     |     |     |     |     |     |
| LSGAYGTAK            | 3  | 14 | 20 | 37 | 25 |    |    |     |     |     |     |     |     |     |     |     |
| SVHLTDR              | 24 | 50 | 25 |    |    |    |    |     |     |     |     |     |     |     |     |     |

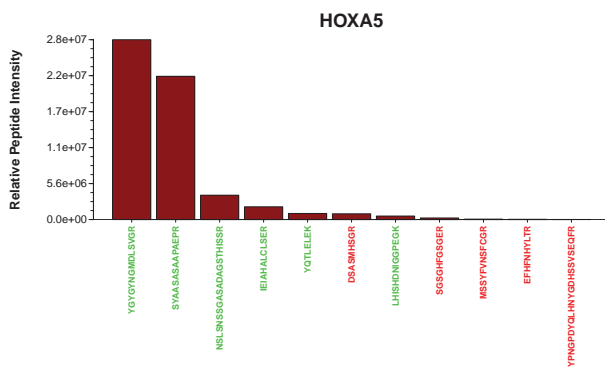

Relative Contribution of Transition to Signal (%)

| Peptides            | Y3 | Y4 | Y5 | Y6 | Y7 | Y8 | Y9 | Y10 | Y11 | Y12 | Y13 | Y14 | Y15 | Y16 | Y17 | Y18 |
|---------------------|----|----|----|----|----|----|----|-----|-----|-----|-----|-----|-----|-----|-----|-----|
| IEIAHALCLSER        | 4  | 3  | 9  | 19 | 29 | 12 | 4  |     |     |     |     |     |     |     |     |     |
| LHSHDNGGPEK         | 1  | 8  | 18 | 4  | 8  | 7  | 8  | 23  | 16  |     |     |     |     |     |     |     |
| NSLSNSGASADAGSTHSRR | 21 | 8  | 7  | 4  | 2  | 7  | 15 | 6   | 5   | 9   | 2   | 6   | 4   | 2   |     |     |
| SYAASAAAPR          | 1  | 1  | 27 | 16 | 10 | 19 | 9  | 11  | 5   | 3   |     |     |     |     |     |     |
| YGYGNGMLSVGR        | 4  | 13 | 14 | 10 | 4  | 17 | 17 | 6   | 13  | 1   |     |     |     |     |     |     |
| YQTLLELEK           | 8  | 8  | 10 | 74 |    |    |    |     |     |     |     |     |     |     |     |     |

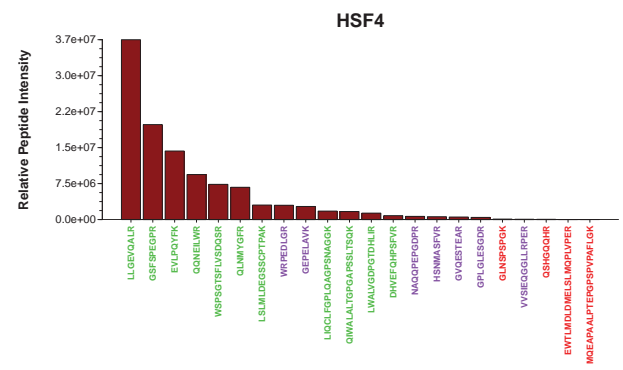

Relative Contribution of Transition to Signal (%)

| Peptides             | Y3 | Y4 | Y5 | Y6 | Y7 | Y8 | Y9 | Y10 | Y11 | Y12 | Y13 | Y14 | Y15 | Y16 | Y17 | Y18 |
|----------------------|----|----|----|----|----|----|----|-----|-----|-----|-----|-----|-----|-----|-----|-----|
| DHVEFHQHSFVR         | 1  | 2  | 27 | 16 | 10 | 14 | 20 | 9   |     |     |     |     |     |     |     |     |
| EVLPQYFK             | 7  | 4  | 73 | 15 |    |    |    |     |     |     |     |     |     |     |     |     |
| GSFPEGPR             | 6  | 24 | 42 | 22 | 6  |    |    |     |     |     |     |     |     |     |     |     |
| LIQCLFQPLAAGPSNAGGK  | 7  | 6  | 3  | 1  | 7  | 16 | 12 | 3   | 0   | 13  | 24  | 9   | 1   |     |     |     |
| LLGEVQALR            | 3  | 9  | 13 | 3  | 71 |    |    |     |     |     |     |     |     |     |     |     |
| LSLMLDEGSSCPPTAK     | 19 | 1  | 11 | 6  | 6  | 5  | 17 | 8   | 17  | 9   | 2   |     |     |     |     |     |
| LWALVDPGPDHLIR       | 1  | 12 | 1  | 1  | 1  | 54 | 3  | 17  | 7   | 1   | 1   |     |     |     |     |     |
| QIWALALTPGAPSSLTSSQK | 4  | 6  | 1  | 2  | 1  | 19 | 3  | 1   | 23  | 25  | 11  | 3   | 1   |     |     |     |
| QLMVYGR              | 31 | 32 | 10 | 26 |    |    |    |     |     |     |     |     |     |     |     |     |
| QQNEIWR              | 48 | 27 | 8  | 21 |    |    |    |     |     |     |     |     |     |     |     |     |
| WSPSGTFLVSDQSR       | 8  | 4  | 23 | 17 | 12 | 9  | 11 | 3   | 6   | 4   | 3   |     |     |     |     |     |
| GEPELAWK             | 3  | 7  | 5  | 86 |    |    |    |     |     |     |     |     |     |     |     |     |
| GPLGLESDR            | 3  | 30 | 18 | 9  | 30 | 11 |    |     |     |     |     |     |     |     |     |     |
| QVQSTEAR             | 9  | 11 | 28 | 33 | 19 |    |    |     |     |     |     |     |     |     |     |     |
| HSNMASFYR            | 3  | 10 | 15 | 17 | 56 |    |    |     |     |     |     |     |     |     |     |     |
| NAQQPEPQPR           | 3  | 6  | 2  | 7  | 3  | 23 | 55 |     |     |     |     |     |     |     |     |     |
| VVSEIQGLLRPER        | 57 | 13 | 7  | 5  | 5  | 5  | 2  | 3   | 1   | 2   |     |     |     |     |     |     |
| WRPEDLGR             | 61 | 6  | 1  | 32 |    |    |    |     |     |     |     |     |     |     |     |     |

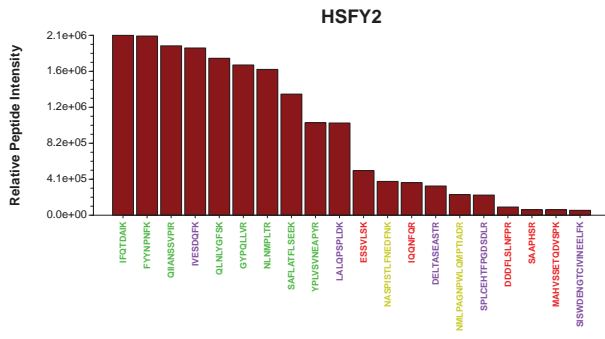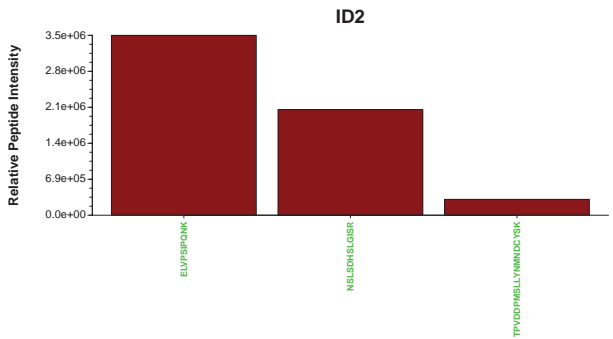

| Peptides           | Relative Contribution of Transition to Signal (%) |    |    |    |    |    |    |     |     |     |     |     |     |     |     |     |  |  |
|--------------------|---------------------------------------------------|----|----|----|----|----|----|-----|-----|-----|-----|-----|-----|-----|-----|-----|--|--|
|                    | Y3                                                | Y4 | Y5 | Y6 | Y7 | Y8 | Y9 | Y10 | Y11 | Y12 | Y13 | Y14 | Y15 | Y16 | Y17 | Y18 |  |  |
| FYYNPNFK           | 2                                                 | 28 | 14 | 56 |    |    |    |     |     |     |     |     |     |     |     |     |  |  |
| GYPQLLVR           | 9                                                 | 26 | 15 | 50 |    |    |    |     |     |     |     |     |     |     |     |     |  |  |
| IFQDAIK            | 6                                                 | 4  | 24 | 67 |    |    |    |     |     |     |     |     |     |     |     |     |  |  |
| NLNMPLTR           | 2                                                 | 31 | 16 | 51 |    |    |    |     |     |     |     |     |     |     |     |     |  |  |
| QIANSVPR           | 21                                                | 5  | 10 | 10 | 13 | 19 | 22 |     |     |     |     |     |     |     |     |     |  |  |
| QLNLVGFSK          | 4                                                 | 32 | 37 | 10 | 17 |    |    |     |     |     |     |     |     |     |     |     |  |  |
| SAFLATLSEEK        | 3                                                 | 14 | 7  | 10 | 22 | 31 | 11 | 3   |     |     |     |     |     |     |     |     |  |  |
| YPLVSVNEAPYR       | 7                                                 | 11 | 4  | 11 | 7  | 33 | 17 | 10  |     |     |     |     |     |     |     |     |  |  |
| MASPISTLNEEDFNK    | 59                                                | 7  | 18 | 12 | 2  | 1  | 1  | 0   | 0   | 0   |     |     |     |     |     |     |  |  |
| NMLPAGNFWLQMPFIADR | 11                                                | 3  | 2  | 27 | 13 | 11 | 8  | 2   | 21  | 1   | 1   |     |     |     |     |     |  |  |
| DELTASEASTR        | 3                                                 | 10 | 7  | 19 | 24 | 31 | 7  |     |     |     |     |     |     |     |     |     |  |  |
| IVESDQFK           | 3                                                 | 3  | 15 | 79 |    |    |    |     |     |     |     |     |     |     |     |     |  |  |
| LALDPSPLDK         | 3                                                 | 20 | 4  | 61 | 6  | 5  |    |     |     |     |     |     |     |     |     |     |  |  |
| SBDWENGTGVNEELFK   | 5                                                 | 9  | 7  | 27 | 19 | 17 | 5  | 7   | 2   | 2   |     |     |     |     |     |     |  |  |
| SPLCEHTFPDSDLR     | 16                                                | 14 | 16 | 30 | 5  | 9  | 10 | 0   | 0   | 0   |     |     |     |     |     |     |  |  |

| Peptides            | Relative Contribution of Transition to Signal (%) |    |    |    |    |    |    |     |     |     |     |     |     |     |     |     |  |  |
|---------------------|---------------------------------------------------|----|----|----|----|----|----|-----|-----|-----|-----|-----|-----|-----|-----|-----|--|--|
|                     | Y3                                                | Y4 | Y5 | Y6 | Y7 | Y8 | Y9 | Y10 | Y11 | Y12 | Y13 | Y14 | Y15 | Y16 | Y17 | Y18 |  |  |
| ELVSPQNK            | 0                                                 | 35 | 3  | 5  | 53 | 3  |    |     |     |     |     |     |     |     |     |     |  |  |
| NSLSDHLSGISR        | 1                                                 | 12 | 8  | 20 | 22 | 9  | 23 | 5   |     |     |     |     |     |     |     |     |  |  |
| TPVDDPMSLLYNNMDCYSK | 8                                                 | 14 | 6  | 9  | 9  | 17 | 20 | 14  | 3   |     |     |     |     |     |     |     |  |  |

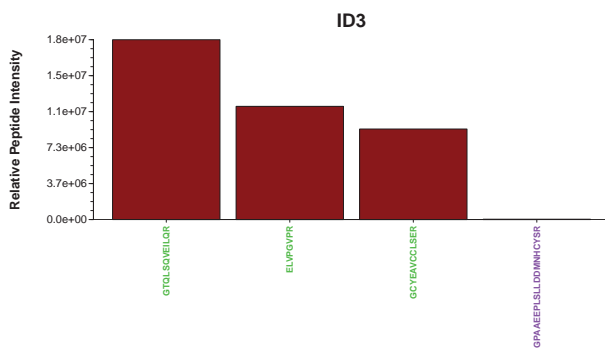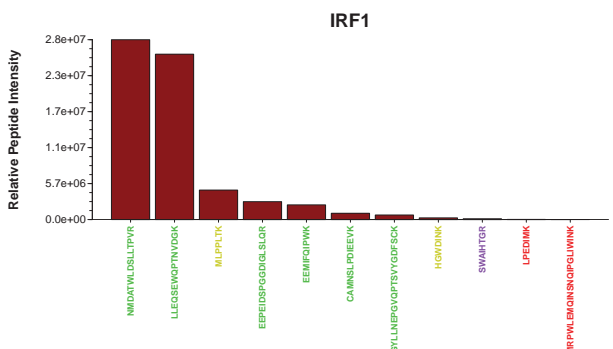

| Peptides           | Relative Contribution of Transition to Signal (%) |    |    |    |    |    |    |     |     |     |     |     |     |     |     |     |  |  |
|--------------------|---------------------------------------------------|----|----|----|----|----|----|-----|-----|-----|-----|-----|-----|-----|-----|-----|--|--|
|                    | Y3                                                | Y4 | Y5 | Y6 | Y7 | Y8 | Y9 | Y10 | Y11 | Y12 | Y13 | Y14 | Y15 | Y16 | Y17 | Y18 |  |  |
| ELVGVPR            | 1                                                 | 11 | 82 | 6  |    |    |    |     |     |     |     |     |     |     |     |     |  |  |
| GCYEAVCLLSER       | 11                                                | 4  | 8  | 28 | 17 | 18 | 9  | 5   |     |     |     |     |     |     |     |     |  |  |
| GTQLSQVEILQR       | 14                                                | 10 | 16 | 13 | 9  | 28 | 10 | 0   |     |     |     |     |     |     |     |     |  |  |
| GPAAEELSLDDMNHCSYR | 10                                                | 15 | 9  | 8  | 18 | 15 | 11 | 10  | 4   |     |     |     |     |     |     |     |  |  |

| Peptides              | Relative Contribution of Transition to Signal (%) |    |    |    |    |    |    |     |     |     |     |     |     |     |     |     |  |  |
|-----------------------|---------------------------------------------------|----|----|----|----|----|----|-----|-----|-----|-----|-----|-----|-----|-----|-----|--|--|
|                       | Y3                                                | Y4 | Y5 | Y6 | Y7 | Y8 | Y9 | Y10 | Y11 | Y12 | Y13 | Y14 | Y15 | Y16 | Y17 | Y18 |  |  |
| CAMNSLPRIEEK          | 3                                                 | 6  | 7  | 2  | 46 | 9  | 11 | 10  | 7   |     |     |     |     |     |     |     |  |  |
| EEMFQIPWK             | 36                                                | 9  | 7  | 35 | 8  | 6  |    |     |     |     |     |     |     |     |     |     |  |  |
| EPEIDSPGGDGLSLQR      | 2                                                 | 12 | 2  | 10 | 10 | 2  | 2  | 3   | 30  | 13  | 11  | 2   |     |     |     |     |  |  |
| GYLLNEPGVQPTSVYGDFSCK | 11                                                | 12 | 4  | 14 | 18 | 4  | 5  | 1   | 27  | 3   | 1   |     |     |     |     |     |  |  |
| LLEGSEWPTNVGDK        | 13                                                | 6  | 5  | 2  | 53 | 4  | 9  | 3   | 5   | 1   |     |     |     |     |     |     |  |  |
| NMDATWLDLSTPVR        | 20                                                | 20 | 7  | 3  | 8  | 12 | 13 | 9   | 5   | 2   | 2   |     |     |     |     |     |  |  |
| HGWDINK               | 62                                                | 12 | 26 |    |    |    |    |     |     |     |     |     |     |     |     |     |  |  |
| MLPLTLK               | 1                                                 | 8  | 92 |    |    |    |    |     |     |     |     |     |     |     |     |     |  |  |
| SWAHTGR               | 8                                                 | 27 | 16 | 49 |    |    |    |     |     |     |     |     |     |     |     |     |  |  |

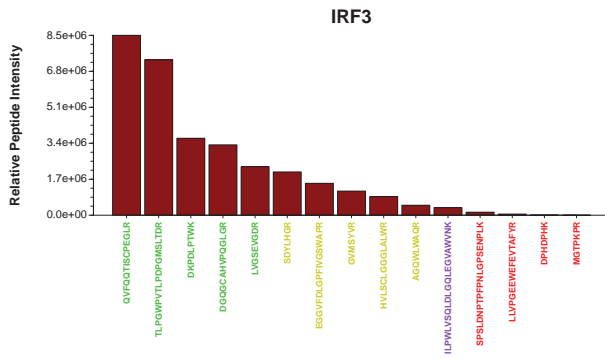

| Peptides             | Relative Contribution of Transition to Signal (%) |    |    |    |    |    |    |     |     |     |     |     |     |     |     |     |
|----------------------|---------------------------------------------------|----|----|----|----|----|----|-----|-----|-----|-----|-----|-----|-----|-----|-----|
|                      | Y3                                                | Y4 | Y5 | Y6 | Y7 | Y8 | Y9 | Y10 | Y11 | Y12 | Y13 | Y14 | Y15 | Y16 | Y17 | Y18 |
| DGGGCAHVPQGLGR       | 1                                                 | 5  | 2  | 73 |    | 10 | 5  | 1   | 3   | 0   |     |     |     |     |     |     |
| DKPDLPTWK            | 1                                                 | 15 | 17 | 4  | 64 |    |    |     |     |     |     |     |     |     |     |     |
| LVGSEVDR             | 4                                                 | 8  | 3  | 4  | 81 |    |    |     |     |     |     |     |     |     |     |     |
| QVFGQTSCEGLR         | 7                                                 | 1  | 18 | 10 | 26 | 10 | 15 | 7   | 3   | 4   |     |     |     |     |     |     |
| TLPGWPVYTLPPQMSLTDK  | 1                                                 | 1  | 2  | 0  | 0  | 48 | 1  | 23  | 4   | 5   | 1   | 14  |     |     |     |     |
| AGOWLWAQR            | 16                                                | 39 | 24 | 21 | 1  |    |    |     |     |     |     |     |     |     |     |     |
| EGGVFDLGFPIVGSWAPR   | 8                                                 | 3  | 3  | 17 | 11 | 4  | 1  | 17  | 27  | 6   | 3   |     |     |     |     |     |
| GVMSYVR              | 8                                                 | 35 | 57 |    |    |    |    |     |     |     |     |     |     |     |     |     |
| HVLSCLGGGLLWR        | 2                                                 | 4  | 1  | 3  | 4  | 15 | 7  | 6   | 17  | 41  |     |     |     |     |     |     |
| SDYLHGR              | 49                                                | 31 | 20 |    |    |    |    |     |     |     |     |     |     |     |     |     |
| ILPWLVSLDQLGQEGVAWVK | 12                                                | 17 | 25 | 2  | 14 | 7  | 5  | 2   | 9   | 4   | 2   |     |     |     |     |     |

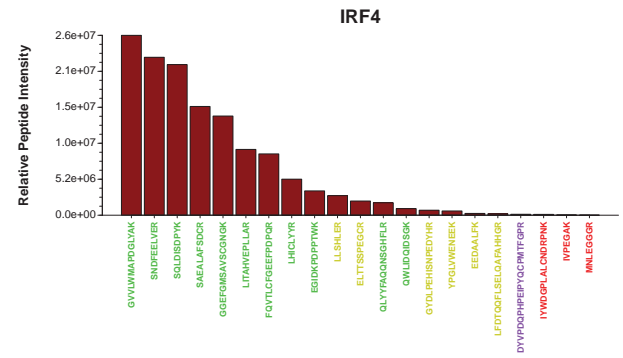

| Peptides              | Relative Contribution of Transition to Signal (%) |    |    |    |    |    |    |     |     |     |     |     |     |     |     |     |
|-----------------------|---------------------------------------------------|----|----|----|----|----|----|-----|-----|-----|-----|-----|-----|-----|-----|-----|
|                       | Y3                                                | Y4 | Y5 | Y6 | Y7 | Y8 | Y9 | Y10 | Y11 | Y12 | Y13 | Y14 | Y15 | Y16 | Y17 | Y18 |
| EGIDKDPPTWK           | 2                                                 | 3  | 88 | 0  | 5  | 1  | 1  | 0   |     |     |     |     |     |     |     |     |
| FVTLFCQGEFFDQDR       | 36                                                | 2  | 20 | 10 | 4  | 2  | 10 | 7   | 8   | 2   |     |     |     |     |     |     |
| GGGFMSAVSCGNGK        | 2                                                 | 7  | 6  | 24 | 11 | 10 | 20 | 5   | 12  | 2   | 0   |     |     |     |     |     |
| GVVLWMAPDGLYAK        | 4                                                 | 1  | 7  | 1  | 25 | 22 | 23 | 14  | 3   | 0   |     |     |     |     |     |     |
| LHCLLYR               | 3                                                 | 5  | 33 | 59 |    |    |    |     |     |     |     |     |     |     |     |     |
| EDGKQDPTWK            | 1                                                 | 1  | 23 | 21 | 25 | 15 | 5  | 9   |     |     |     |     |     |     |     |     |
| LLSHLR                | 8                                                 | 5  | 6  | 7  | 12 | 12 | 13 | 19  | 13  | 5   |     |     |     |     |     |     |
| QWLDQIDSGK            | 14                                                | 13 | 5  | 8  | 30 | 16 | 13 |     |     |     |     |     |     |     |     |     |
| SAEALAFSDCR           | 3                                                 | 12 | 27 | 35 | 13 | 8  | 2  |     |     |     |     |     |     |     |     |     |
| SNDFEELVER            | 12                                                | 14 | 19 | 24 | 15 | 16 |    |     |     |     |     |     |     |     |     |     |
| SGLDISDPYK            | 23                                                | 4  | 10 | 10 | 21 | 33 |    |     |     |     |     |     |     |     |     |     |
| EEDALFK               | 25                                                | 32 | 13 | 31 |    |    |    |     |     |     |     |     |     |     |     |     |
| ELTTSSPEGCR           | 11                                                | 2  | 27 | 27 | 15 | 18 |    |     |     |     |     |     |     |     |     |     |
| GVDLPEHNSPEDYHR       | 17                                                | 6  | 1  | 21 | 5  | 26 | 11 | 6   | 2   | 6   |     |     |     |     |     |     |
| LFDTQFLSELGAFHHGR     | 18                                                | 14 | 11 | 9  | 9  | 7  | 8  | 3   | 13  | 8   |     |     |     |     |     |     |
| LLSHLR                | 16                                                | 13 | 71 |    |    |    |    |     |     |     |     |     |     |     |     |     |
| YPLGVWENEK            | 2                                                 | 10 | 10 | 32 | 25 | 4  | 18 |     |     |     |     |     |     |     |     |     |
| DYVPDQHPPEIPYQCPMTGPR | 12                                                | 7  | 4  | 1  | 17 | 7  | 3  | 1   | 42  | 4   |     |     |     |     |     |     |

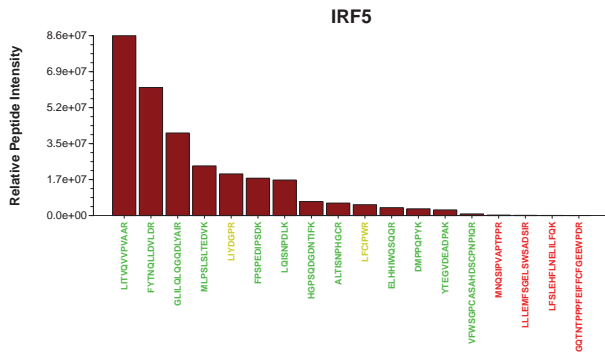

| Peptides           | Relative Contribution of Transition to Signal (%) |    |    |    |    |    |    |     |     |     |     |     |     |     |     |     |
|--------------------|---------------------------------------------------|----|----|----|----|----|----|-----|-----|-----|-----|-----|-----|-----|-----|-----|
|                    | Y3                                                | Y4 | Y5 | Y6 | Y7 | Y8 | Y9 | Y10 | Y11 | Y12 | Y13 | Y14 | Y15 | Y16 | Y17 | Y18 |
| ALTSINPHGCR        | 9                                                 | 4  | 30 | 11 | 29 | 7  | 11 |     |     |     |     |     |     |     |     |     |
| DMPFPQYK           | 12                                                | 1  | 17 | 70 |    |    |    |     |     |     |     |     |     |     |     |     |
| ELHHWQSQQR         | 1                                                 | 9  | 7  | 37 | 23 | 23 | 1  |     |     |     |     |     |     |     |     |     |
| FPSPEIDPSDK        | 3                                                 | 35 | 13 | 5  | 4  | 23 | 16 |     |     |     |     |     |     |     |     |     |
| FTFNGLDYLDR        | 8                                                 | 13 | 17 | 21 | 16 | 5  | 7  | 13  |     |     |     |     |     |     |     |     |
| QLILQLGQDLYAR      | 12                                                | 9  | 8  | 5  | 3  | 25 | 14 | 16  | 6   | 2   |     |     |     |     |     |     |
| HGPSQGDNTIFK       | 5                                                 | 3  | 28 | 1  | 27 | 8  | 2  | 5   | 20  |     |     |     |     |     |     |     |
| LITVQVVAAR         | 1                                                 | 1  | 24 | 18 | 17 | 24 | 5  | 9   |     |     |     |     |     |     |     |     |
| LQISNPDLK          | 1                                                 | 16 | 4  | 21 | 59 |    |    |     |     |     |     |     |     |     |     |     |
| MLPSLSLTDK         | 3                                                 | 3  | 8  | 6  | 20 | 12 | 13 | 36  |     |     |     |     |     |     |     |     |
| VFWSGPCASAHSDCPNQR | 2                                                 | 17 | 1  | 18 | 5  | 20 | 10 | 12  | 7   | 7   | 2   |     |     |     |     |     |
| YTEGVDEADPAK       | 29                                                | 4  | 5  | 5  | 19 | 4  | 16 | 17  |     |     |     |     |     |     |     |     |
| LFCIPWR            | 29                                                | 15 | 55 |    |    |    |    |     |     |     |     |     |     |     |     |     |
| LYDQPR             | 30                                                | 6  | 64 |    |    |    |    |     |     |     |     |     |     |     |     |     |

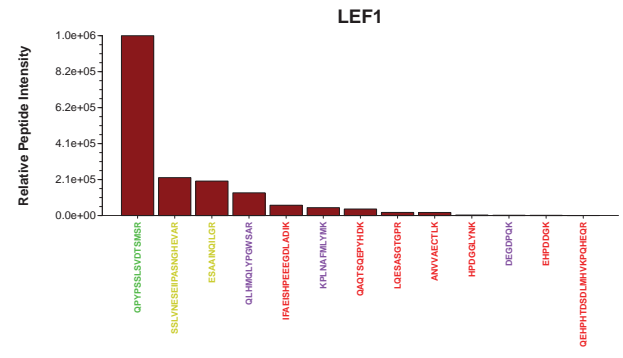

| Peptides            | Relative Contribution of Transition to Signal (%) |    |    |    |    |    |    |     |     |     |     |     |     |     |     |     |
|---------------------|---------------------------------------------------|----|----|----|----|----|----|-----|-----|-----|-----|-----|-----|-----|-----|-----|
|                     | Y3                                                | Y4 | Y5 | Y6 | Y7 | Y8 | Y9 | Y10 | Y11 | Y12 | Y13 | Y14 | Y15 | Y16 | Y17 | Y18 |
| QPYPSLSVTSMSR       | 2                                                 | 4  | 13 | 13 | 7  | 28 | 9  | 8   | 4   | 9   | 2   |     |     |     |     |     |
| ESAAINILGR          | 15                                                | 12 |    | 51 | 13 | 7  | 2  |     |     |     |     |     |     |     |     |     |
| SSLVNESEIPASNGHEVAR | 1                                                 | 2  | 2  | 1  | 2  | 3  | 2  | 66  | 14  | 6   | 1   | 1   |     |     |     |     |
| DEGDPQK             | 21                                                | 13 | 66 |    |    |    |    |     |     |     |     |     |     |     |     |     |
| KPLNAFMLYMK         | 11                                                | 11 | 7  | 8  | 12 | 27 | 24 |     |     |     |     |     |     |     |     |     |
| QLHMLQYQWSAR        | 6                                                 | 1  | 2  | 46 | 12 | 9  | 13 | 8   | 3   |     |     |     |     |     |     |     |

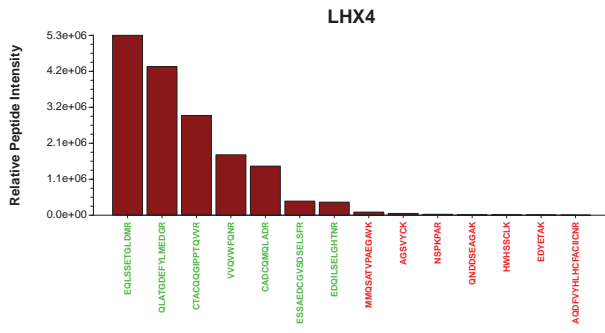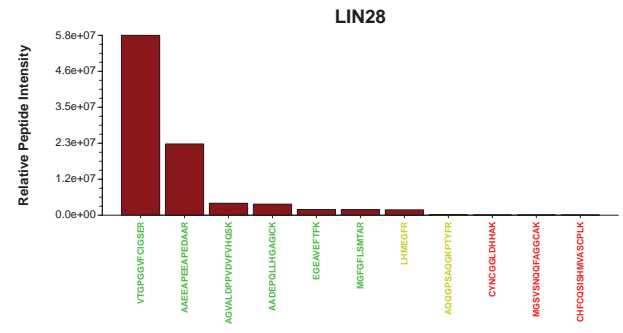

#### Relative Contribution of Transition to Signal (%)

| Peptides          | Y3 | Y4 | Y5 | Y6 | Y7 | Y8 | Y9 | Y10 | Y11 | Y12 | Y13 | Y14 | Y15 | Y16 | Y17 | Y18 |
|-------------------|----|----|----|----|----|----|----|-----|-----|-----|-----|-----|-----|-----|-----|-----|
| CADCOMQLADR       | 18 | 17 | 12 | 17 | 9  | 9  | 18 |     |     |     |     |     |     |     |     |     |
| CTACCGQIPPTQVVR   | 1  | 2  | 0  | 2  | 80 | 2  | 8  | 3   | 1   | 1   | 0   |     |     |     |     |     |
| EDQLSELGHTNR      | 5  | 6  | 16 | 12 | 6  | 26 | 23 | 4   | 0   |     |     |     |     |     |     |     |
| EQLSSETGLDMR      | 7  | 2  | 12 | 16 | 9  | 17 | 24 | 14  |     |     |     |     |     |     |     |     |
| ESSAEDCGVSDSELSFR | 11 | 9  | 3  | 13 | 5  | 32 | 4  | 12  | 7   | 6   |     |     |     |     |     |     |
| QLATQDEFLMEDQR    | 7  | 12 | 18 | 15 | 14 | 10 | 6  | 4   | 8   | 6   |     |     |     |     |     |     |
| VVQVWFQNR         | 7  | 20 | 35 | 21 | 16 |    |    |     |     |     |     |     |     |     |     |     |

#### Relative Contribution of Transition to Signal (%)

| Peptides        | Y3 | Y4 | Y5 | Y6 | Y7 | Y8 | Y9 | Y10 | Y11 | Y12 | Y13 | Y14 | Y15 | Y16 | Y17 | Y18 |
|-----------------|----|----|----|----|----|----|----|-----|-----|-----|-----|-----|-----|-----|-----|-----|
| AADPEQLLHGAGICK | 2  | 9  | 4  | 24 | 23 | 12 | 7  | 2   | 18  | 0   | 0   |     |     |     |     |     |
| AAEAPPEAPEDAAR  | 6  | 2  | 0  | 16 | 10 | 5  | 2  | 53  | 5   | 1   | 0   |     |     |     |     |     |
| AGVALDPVDFVHQSK | 3  | 17 | 4  | 5  | 4  | 3  | 1  | 6   | 51  | 6   | 1   |     |     |     |     |     |
| EGEAVEFTFK      | 8  | 14 | 45 | 18 | 14 | 2  |    |     |     |     |     |     |     |     |     |     |
| MGFGLSMTAR      | 4  | 7  | 29 | 25 | 9  | 22 | 3  |     |     |     |     |     |     |     |     |     |
| VTGPGVFCGSR     | 3  | 16 | 6  | 11 | 32 | 6  | 8  | 8   | 3   | 6   |     |     |     |     |     |     |
| AQQGPSAGGKPTFYR | 2  | 2  | 38 | 3  | 15 | 8  | 5  | 3   | 9   | 11  | 3   |     |     |     |     |     |
| LHMEGRF         | 12 | 14 | 73 |    |    |    |    |     |     |     |     |     |     |     |     |     |

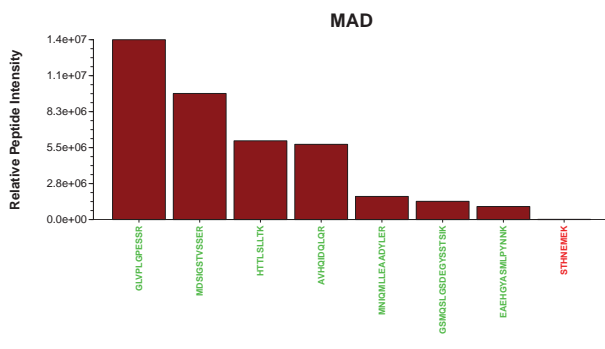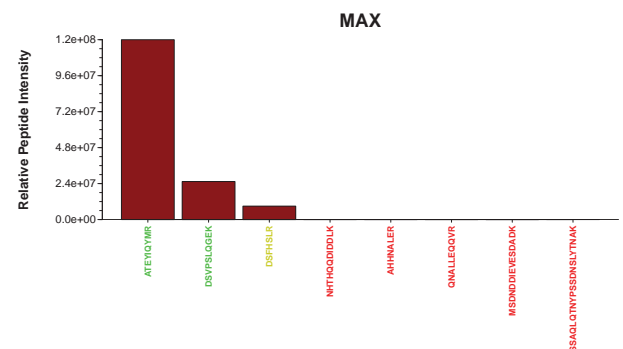

#### Relative Contribution of Transition to Signal (%)

| Peptides          | Y3 | Y4 | Y5 | Y6 | Y7 | Y8 | Y9 | Y10 | Y11 | Y12 | Y13 | Y14 | Y15 | Y16 | Y17 | Y18 |
|-------------------|----|----|----|----|----|----|----|-----|-----|-----|-----|-----|-----|-----|-----|-----|
| AVHQDQLQR         | 3  | 21 | 17 | 26 | 27 | 5  |    |     |     |     |     |     |     |     |     |     |
| EAEHGASMLPYNNK    | 15 | 3  | 50 | 6  | 3  | 5  | 7  | 3   | 8   | 1   |     |     |     |     |     |     |
| GLVPLQPESSR       | 3  | 1  | 7  | 30 | 8  | 51 | 1  |     |     |     |     |     |     |     |     |     |
| GSMQSLGSDGYSSTSIK | 9  | 5  | 6  | 11 | 2  | 8  | 6  | 5   | 8   | 29  | 6   | 6   |     |     |     |     |
| HTLSLLIK          | 14 | 6  | 10 | 10 | 61 |    |    |     |     |     |     |     |     |     |     |     |
| MDSIGSTVSSER      | 4  | 12 | 6  | 8  | 10 | 47 | 5  | 8   |     |     |     |     |     |     |     |     |
| MNQMLLEADYLER     | 1  | 7  | 5  | 9  | 14 | 18 | 20 | 13  | 9   | 3   |     |     |     |     |     |     |

#### Relative Contribution of Transition to Signal (%)

| Peptides   | Y3 | Y4 | Y5 | Y6 | Y7 | Y8 | Y9 | Y10 | Y11 | Y12 | Y13 | Y14 | Y15 | Y16 | Y17 | Y18 |
|------------|----|----|----|----|----|----|----|-----|-----|-----|-----|-----|-----|-----|-----|-----|
| ATEYQYMR   | 14 | 26 | 22 | 23 | 15 |    |    |     |     |     |     |     |     |     |     |     |
| DSVPSLOGEK | 3  | 2  | 3  | 8  | 82 | 2  |    |     |     |     |     |     |     |     |     |     |
| DSFHSRLR   | 42 | 45 | 13 |    |    |    |    |     |     |     |     |     |     |     |     |     |

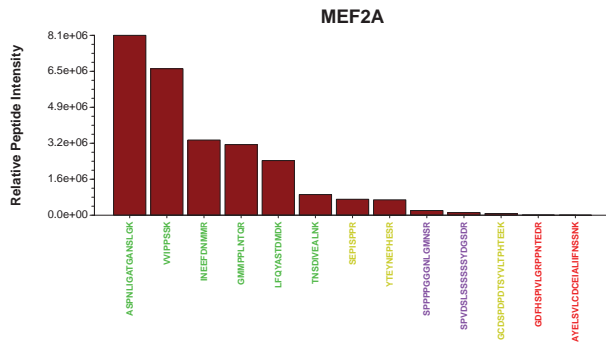

| Peptides             | Relative Contribution of Transition to Signal (%) |    |    |    |    |    |    |     |     |     |     |     |     |     |     |     |
|----------------------|---------------------------------------------------|----|----|----|----|----|----|-----|-----|-----|-----|-----|-----|-----|-----|-----|
|                      | Y3                                                | Y4 | Y5 | Y6 | Y7 | Y8 | Y9 | Y10 | Y11 | Y12 | Y13 | Y14 | Y15 | Y16 | Y17 | Y18 |
| ASPNLGATGANSLSLK     | 2                                                 | 3  | 3  | 2  | 8  | 9  | 6  | 43  | 18  | 4   | 1   | 0   |     |     |     |     |
| GMMPLNTOR            | 3                                                 | 6  | 6  | 29 | 52 | 4  |    |     |     |     |     |     |     |     |     |     |
| INEEFDNMR            | 4                                                 | 15 | 16 | 28 | 16 | 21 |    |     |     |     |     |     |     |     |     |     |
| LFOYASTDMK           | 7                                                 | 5  | 7  | 19 | 22 | 29 | 10 |     |     |     |     |     |     |     |     |     |
| TNSDVEALNK           | 6                                                 | 12 | 16 | 27 | 10 | 7  | 22 |     |     |     |     |     |     |     |     |     |
| VVPPSSK              | 1                                                 | 9  | 51 | 39 |    |    |    |     |     |     |     |     |     |     |     |     |
| GCDSPDPDTSYVLTPTHEEK | 3                                                 | 11 | 3  | 46 | 12 | 10 | 7  | 2   | 3   | 3   |     |     |     |     |     |     |
| SEPSPPR              | 8                                                 | 51 | 11 | 30 |    |    |    |     |     |     |     |     |     |     |     |     |
| YTEYNEPHER           | 7                                                 | 3  | 47 | 8  | 14 | 12 | 8  |     |     |     |     |     |     |     |     |     |
| SPVDSLSLSSSSSYDGSDR  | 1                                                 | 1  | 4  | 2  | 1  | 2  | 3  | 7   | 28  | 26  | 26  |     |     |     |     |     |
| SPVDSLSLSSSSSYDGSDR  | 1                                                 | 19 | 5  | 5  | 5  | 5  | 6  | 12  | 15  | 22  | 2   | 4   |     |     |     |     |

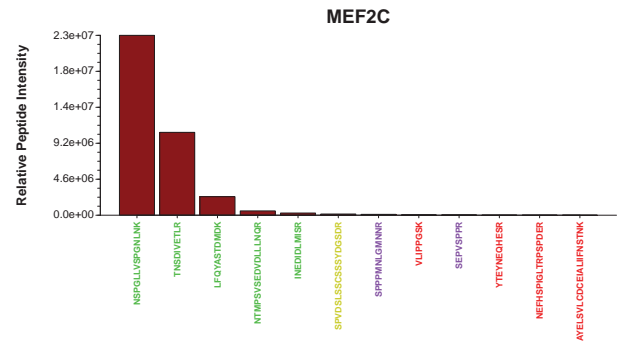

| Peptides            | Relative Contribution of Transition to Signal (%) |    |    |    |    |    |    |     |     |     |     |     |     |     |     |     |
|---------------------|---------------------------------------------------|----|----|----|----|----|----|-----|-----|-----|-----|-----|-----|-----|-----|-----|
|                     | Y3                                                | Y4 | Y5 | Y6 | Y7 | Y8 | Y9 | Y10 | Y11 | Y12 | Y13 | Y14 | Y15 | Y16 | Y17 | Y18 |
| INEDLMIKR           | 9                                                 | 12 | 12 | 25 | 11 | 14 | 17 |     |     |     |     |     |     |     |     |     |
| LFOYASTDMK          | 5                                                 | 5  | 7  | 18 | 23 | 30 | 12 |     |     |     |     |     |     |     |     |     |
| NSPOLLYSPGNLTK      | 1                                                 | 1  | 1  | 21 | 30 | 20 | 14 | 2   | 3   | 6   |     |     |     |     |     |     |
| NTMPSVSEVDLLNLR     | 13                                                | 18 | 12 | 9  | 11 | 6  | 7  | 4   | 18  | 2   | 1   |     |     |     |     |     |
| TNSDVELR            | 6                                                 | 15 | 32 | 14 | 9  | 25 |    |     |     |     |     |     |     |     |     |     |
| SPVDSLSLSSSSSYDGSDR | 2                                                 | 22 | 8  | 5  | 6  | 6  | 10 | 8   | 14  | 17  | 2   |     |     |     |     |     |
| SEPSPPR             | 7                                                 | 41 | 6  | 45 |    |    |    |     |     |     |     |     |     |     |     |     |
| SPVDSLSLSSSSSYDGSDR | 3                                                 | 3  | 8  | 6  | 7  | 4  | 21 | 48  |     |     |     |     |     |     |     |     |

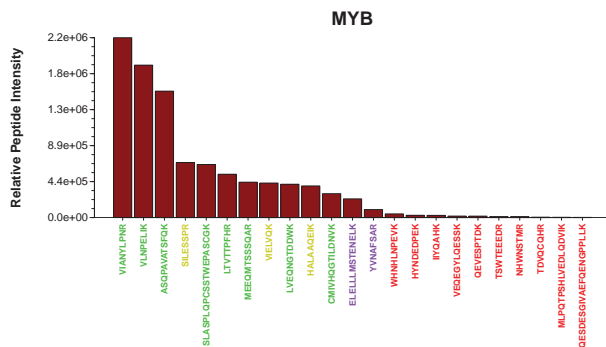

| Peptides            | Relative Contribution of Transition to Signal (%) |    |    |    |    |    |    |     |     |     |     |     |     |     |     |     |
|---------------------|---------------------------------------------------|----|----|----|----|----|----|-----|-----|-----|-----|-----|-----|-----|-----|-----|
|                     | Y3                                                | Y4 | Y5 | Y6 | Y7 | Y8 | Y9 | Y10 | Y11 | Y12 | Y13 | Y14 | Y15 | Y16 | Y17 | Y18 |
| ASQPAVTSFK          | 2                                                 | 6  | 7  | 19 | 7  | 4  | 54 | 0   |     |     |     |     |     |     |     |     |
| CMVHOGTILDQWK       | 16                                                | 10 | 9  | 3  | 2  | 22 | 8  | 18  | 11  | 2   |     |     |     |     |     |     |
| LVTVTPFHR           | 2                                                 | 30 | 15 | 36 | 17 |    |    |     |     |     |     |     |     |     |     |     |
| LVEQNGTDQWK         | 6                                                 | 8  | 5  | 17 | 20 | 8  | 36 |     |     |     |     |     |     |     |     |     |
| MEGNITSSGAR         | 3                                                 | 7  | 9  | 20 | 28 | 19 | 8  | 7   |     |     |     |     |     |     |     |     |
| SLASPLQPCSTWEPASCGK | 4                                                 | 10 | 2  | 50 | 6  | 3  | 2  | 2   | 2   | 1   | 19  |     |     |     |     |     |
| VIANTLPIK           | 20                                                | 13 | 9  | 12 | 46 |    |    |     |     |     |     |     |     |     |     |     |
| VLNPELIK            | 5                                                 | 2  | 32 | 62 |    |    |    |     |     |     |     |     |     |     |     |     |
| HALAAGEIK           | 4                                                 | 3  | 9  | 20 | 64 |    |    |     |     |     |     |     |     |     |     |     |
| SILESSPR            | 3                                                 | 25 | 21 | 51 |    |    |    |     |     |     |     |     |     |     |     |     |
| VIELVQK             | 5                                                 | 8  | 86 |    |    |    |    |     |     |     |     |     |     |     |     |     |
| ELELLMSTENELK       | 1                                                 | 9  | 5  | 8  | 21 | 24 | 23 | 8   | 1   | 0   |     |     |     |     |     |     |
| YVNAFSAR            | 9                                                 | 11 | 12 | 67 |    |    |    |     |     |     |     |     |     |     |     |     |

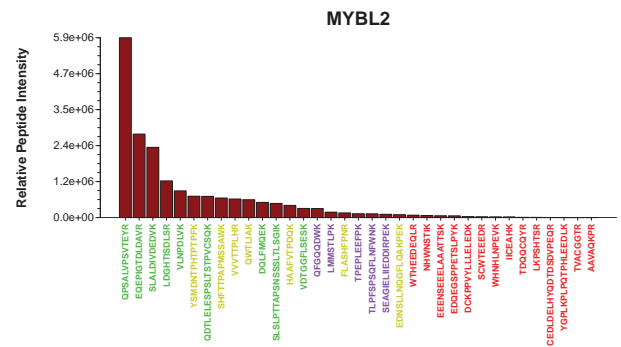

| Peptides            | Relative Contribution of Transition to Signal (%) |    |    |    |    |    |    |     |     |     |     |     |     |     |     |     |
|---------------------|---------------------------------------------------|----|----|----|----|----|----|-----|-----|-----|-----|-----|-----|-----|-----|-----|
|                     | Y3                                                | Y4 | Y5 | Y6 | Y7 | Y8 | Y9 | Y10 | Y11 | Y12 | Y13 | Y14 | Y15 | Y16 | Y17 | Y18 |
| DQLEFQK             | 5                                                 | 19 | 36 | 40 |    |    |    |     |     |     |     |     |     |     |     |     |
| EQEPDTDAVR          | 7                                                 | 3  | 7  | 8  | 5  | 31 | 4  | 31  | 4   |     |     |     |     |     |     |     |
| LDGHTSDLSR          | 21                                                | 3  | 19 | 22 | 31 | 1  | 2  |     |     |     |     |     |     |     |     |     |
| QDTLESPSLTSTPVCQK   | 5                                                 | 10 | 1  | 33 | 5  | 7  | 8  | 1   | 1   | 19  | 10  |     |     |     |     |     |
| QRALVPVTR           | 1                                                 | 3  | 1  | 2  | 68 | 13 | 5  | 1   | 7   |     |     |     |     |     |     |     |
| SLASPLQPCSTWEPASCGK | 3                                                 | 5  | 9  | 17 | 11 | 25 | 12 | 18  |     |     |     |     |     |     |     |     |
| SLSLPTTAPNSSSLQK    | 5                                                 | 10 | 5  | 6  | 1  | 2  | 2  | 3   | 2   | 2   | 52  | 9   | 3   |     |     |     |
| VDTGGLESK           | 4                                                 | 19 | 11 | 7  | 13 | 19 | 27 |     |     |     |     |     |     |     |     |     |
| VLNPDQK             | 4                                                 | 3  | 29 | 63 |    |    |    |     |     |     |     |     |     |     |     |     |
| EDNLLNOGFLQAKPEK    | 42                                                | 9  | 5  | 5  | 4  | 2  | 13 | 6   | 10  | 4   | 1   |     |     |     |     |     |
| FLASHFPNR           | 22                                                | 24 | 11 | 14 | 29 |    |    |     |     |     |     |     |     |     |     |     |
| HAAPVTFQK           | 2                                                 | 34 | 14 | 5  | 10 | 35 |    |     |     |     |     |     |     |     |     |     |
| QWTLQK              | 32                                                | 21 | 47 |    |    |    |    |     |     |     |     |     |     |     |     |     |
| SHFTTAPMSSAWK       | 2                                                 | 3  | 15 | 0  | 13 | 2  | 40 | 8   | 15  | 14  |     |     |     |     |     |     |
| VVVTTLR             | 0                                                 | 19 | 9  | 30 | 42 |    |    |     |     |     |     |     |     |     |     |     |
| YSMDNTPHTPTPFK      | 21                                                | 2  | 19 | 10 | 3  | 31 | 4  | 4   | 4   | 1   |     |     |     |     |     |     |
| LMMSTLQK            | 1                                                 | 1  | 11 | 87 |    |    |    |     |     |     |     |     |     |     |     |     |
| QEGQDNK             | 24                                                | 30 | 6  | 41 |    |    |    |     |     |     |     |     |     |     |     |     |
| SEAGLIEDDIRPEK      | 6                                                 | 7  | 19 | 9  | 5  | 12 | 19 | 13  | 7   | 2   |     |     |     |     |     |     |
| TLPFSPQFLNFWNK      | 12                                                | 9  | 10 | 6  | 8  | 2  | 3  | 38  | 12  |     |     |     |     |     |     |     |
| TPELEEFK            | 10                                                | 8  | 9  | 7  | 54 | 12 |    |     |     |     |     |     |     |     |     |     |

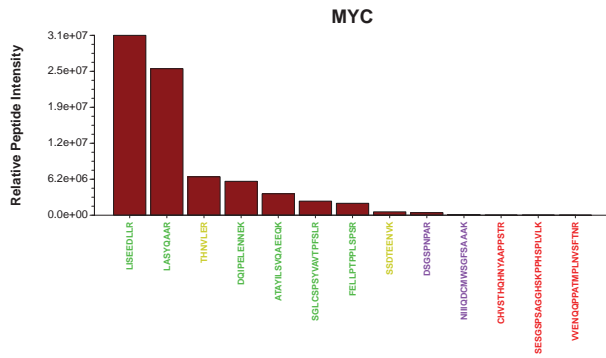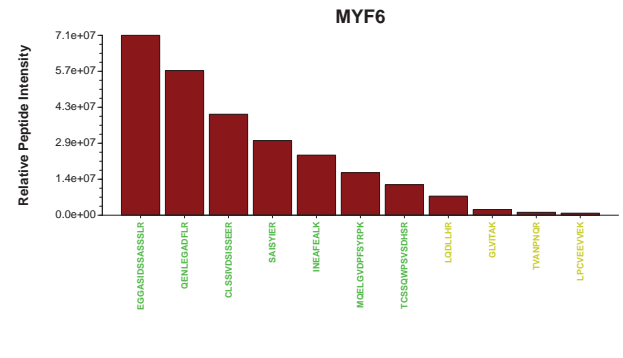

| Peptides          | Y3 | Y4 | Y5 | Y6 | Y7 | Y8 | Y9 | Y10 | Y11 | Y12 | Y13 | Y14 | Y15 | Y16 | Y17 | Y18 |
|-------------------|----|----|----|----|----|----|----|-----|-----|-----|-----|-----|-----|-----|-----|-----|
| ATAVLSYQAEQK      | 5  | 6  | 9  | 10 | 9  | 25 | 26 | 8   | 1   | 0   |     |     |     |     |     |     |
| DOIFLENNEK        | 1  | 4  | 3  | 5  | 2  | 81 | 5  |     |     |     |     |     |     |     |     |     |
| FELLPTPLSPSR      | 2  | 2  | 1  | 2  | 11 | 2  | 75 | 3   | 2   |     |     |     |     |     |     |     |
| LASYQAAK          | 7  | 15 | 10 | 68 |    |    |    |     |     |     |     |     |     |     |     |     |
| LISEEDLLR         | 3  | 4  | 7  | 5  | 81 |    |    |     |     |     |     |     |     |     |     |     |
| SGLCSFSYVAVTFPSLR | 2  | 0  | 21 | 25 | 7  | 19 | 10 | 3   | 2   | 11  | 1   |     |     |     |     |     |
| SSDTEENVK         | 5  | 12 | 16 | 22 | 44 |    |    |     |     |     |     |     |     |     |     |     |
| THNVLER           | 10 | 14 | 76 |    |    |    |    |     |     |     |     |     |     |     |     |     |
| DSGSPNPKR         | 8  | 3  | 63 | 5  | 21 |    |    |     |     |     |     |     |     |     |     |     |
| NIQDCMWSGFSAAK    | 6  | 7  | 14 | 2  | 14 | 18 | 17 | 6   | 8   | 8   | 1   |     |     |     |     |     |

| Peptides        | Y3 | Y4 | Y5 | Y6 | Y7 | Y8 | Y9 | Y10 | Y11 | Y12 | Y13 | Y14 | Y15 | Y16 | Y17 | Y18 |
|-----------------|----|----|----|----|----|----|----|-----|-----|-----|-----|-----|-----|-----|-----|-----|
| CLSSVDSISSEER   | 1  | 5  | 12 | 4  | 12 | 17 | 27 | 5   | 6   | 12  |     |     |     |     |     |     |
| EGGASIDSSASSSLK | 3  | 5  | 8  | 7  | 8  | 16 | 34 | 9   | 10  | 1   | 0   |     |     |     |     |     |
| INEAFEALK       | 8  | 8  | 26 | 22 | 36 |    |    |     |     |     |     |     |     |     |     |     |
| MQELGVDFPSYRPK  | 3  | 2  | 4  | 1  | 58 | 10 | 2  | 12  | 4   | 3   |     |     |     |     |     |     |
| QENLEGADFLR     | 12 | 7  | 4  | 39 | 23 | 6  | 11 |     |     |     |     |     |     |     |     |     |
| SASVIER         | 7  | 17 | 56 | 29 |    |    |    |     |     |     |     |     |     |     |     |     |
| TCSSQWPSVSDHSR  | 12 | 2  | 9  | 2  | 4  | 53 | 12 | 1   | 2   | 3   |     |     |     |     |     |     |
| GLVTAK          | 12 | 25 | 63 |    |    |    |    |     |     |     |     |     |     |     |     |     |
| LPCVEEYVEK      | 13 | 10 | 7  | 21 | 21 | 28 |    |     |     |     |     |     |     |     |     |     |
| LDLLELR         | 11 | 20 | 69 |    |    |    |    |     |     |     |     |     |     |     |     |     |
| TVANPNQR        | 2  | 31 | 12 | 55 |    |    |    |     |     |     |     |     |     |     |     |     |

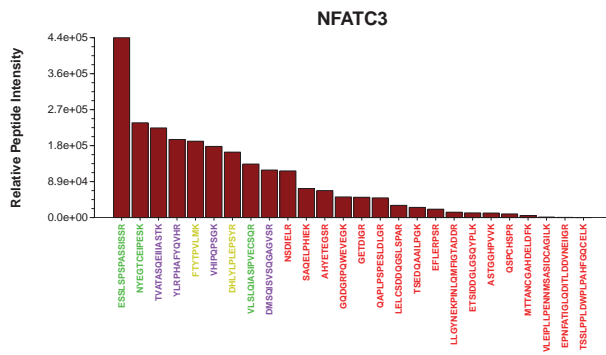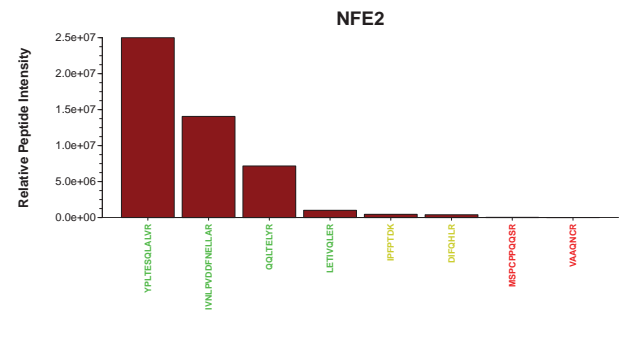

| Peptides         | Y3 | Y4 | Y5 | Y6 | Y7 | Y8 | Y9 | Y10 | Y11 | Y12 | Y13 | Y14 | Y15 | Y16 | Y17 | Y18 |
|------------------|----|----|----|----|----|----|----|-----|-----|-----|-----|-----|-----|-----|-----|-----|
| ESSLSPPASSISRR   | 3  | 1  | 2  | 4  | 1  | 14 | 4  | 53  | 16  | 1   | 0   |     |     |     |     |     |
| NYEGTCEPEK       | 2  | 62 | 5  | 2  | 4  | 2  | 12 | 11  |     |     |     |     |     |     |     |     |
| VLSLQIASIPVECSQR | 1  | 3  | 1  | 51 | 6  | 11 | 18 | 7   | 1   |     |     |     |     |     |     |     |
| DHLVLRLEPSYR     | 0  | 14 | 2  | 1  | 45 | 15 | 14 | 10  |     |     |     |     |     |     |     |     |
| FTTTPVLMK        | 8  | 2  | 29 | 16 | 46 |    |    |     |     |     |     |     |     |     |     |     |
| DMSQISVSGAGVSR   | 1  | 10 | 4  | 14 | 5  | 11 | 39 | 12  | 2   | 1   |     |     |     |     |     |     |
| TVATASQEIISTK    | 12 | 15 | 11 | 9  | 4  | 8  | 5  | 17  | 7   | 4   | 7   |     |     |     |     |     |
| VHWPQSK          | 1  | 25 | 3  | 46 | 22 |    |    |     |     |     |     |     |     |     |     |     |
| YLRPHAFQVHR      | 9  | 1  | 87 | 3  | 0  | 0  | 0  | 0   |     |     |     |     |     |     |     |     |

| Peptides      | Y3 | Y4 | Y5 | Y6 | Y7 | Y8 | Y9 | Y10 | Y11 | Y12 | Y13 | Y14 | Y15 | Y16 | Y17 | Y18 |
|---------------|----|----|----|----|----|----|----|-----|-----|-----|-----|-----|-----|-----|-----|-----|
| IWLPPDFFELLAR | 4  | 4  | 1  | 2  | 7  | 6  | 8  | 4   | 61  | 2   |     |     |     |     |     |     |
| LETIVQLER     | 5  | 15 | 33 | 11 | 36 |    |    |     |     |     |     |     |     |     |     |     |
| QQLTELYR      | 19 | 21 | 34 | 26 |    |    |    |     |     |     |     |     |     |     |     |     |
| YPLTESQALVR   | 5  | 8  | 6  | 4  | 17 | 14 | 29 | 17  |     |     |     |     |     |     |     |     |
| DIFQHLR       | 20 | 23 | 57 |    |    |    |    |     |     |     |     |     |     |     |     |     |
| IPFPTDK       | 5  | 64 | 31 |    |    |    |    |     |     |     |     |     |     |     |     |     |





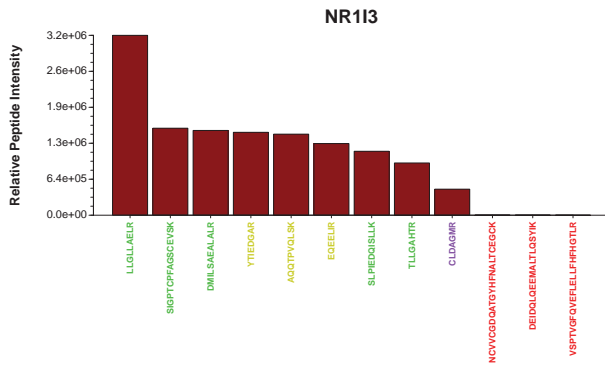

#### Relative Contribution of Transition to Signal (%)

| Peptides        | Y3 | Y4 | Y5 | Y6 | Y7 | Y8 | Y9 | Y10 | Y11 | Y12 | Y13 | Y14 | Y15 | Y16 | Y17 | Y18 |
|-----------------|----|----|----|----|----|----|----|-----|-----|-----|-----|-----|-----|-----|-----|-----|
| DMLSAEALALR     | 7  | 6  | 8  | 9  | 11 | 33 | 23 | 4   |     |     |     |     |     |     |     |     |
| LLGLLAEALR      | 3  | 17 | 22 | 3  | 56 |    |    |     |     |     |     |     |     |     |     |     |
| SIPTCPFAGSCEVSK | 5  | 2  | 3  | 3  | 16 | 10 | 4  | 48  | 6   | 2   | 1   | 1   |     |     |     |     |
| SLPIEDQISLLK    | 5  | 10 | 4  | 5  | 11 | 36 | 9  | 19  |     |     |     |     |     |     |     |     |
| TLGAHTR         | 5  | 5  | 40 | 50 |    |    |    |     |     |     |     |     |     |     |     |     |
| AQOTPVLSLK      | 6  | 6  | 2  | 37 | 23 | 26 |    |     |     |     |     |     |     |     |     |     |
| EQEELR          | 31 | 27 | 43 |    |    |    |    |     |     |     |     |     |     |     |     |     |
| YTIEDGAR        | 17 | 13 | 23 | 47 |    |    |    |     |     |     |     |     |     |     |     |     |
| CLDAGMR         | 12 | 28 | 59 |    |    |    |    |     |     |     |     |     |     |     |     |     |

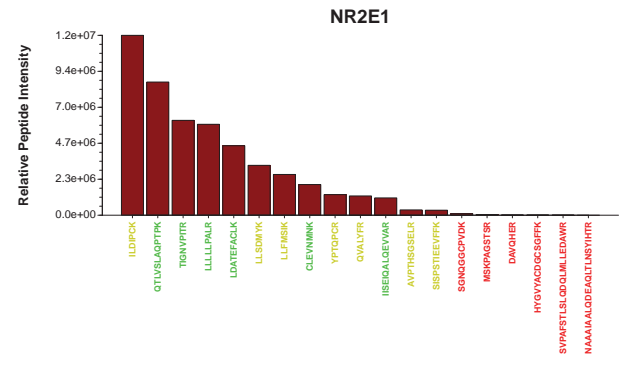

#### Relative Contribution of Transition to Signal (%)

| Peptides      | Y3 | Y4 | Y5 | Y6 | Y7 | Y8 | Y9 | Y10 | Y11 | Y12 | Y13 | Y14 | Y15 | Y16 | Y17 | Y18 |
|---------------|----|----|----|----|----|----|----|-----|-----|-----|-----|-----|-----|-----|-----|-----|
| CLEVNANK      | 5  | 16 | 22 | 56 |    |    |    |     |     |     |     |     |     |     |     |     |
| ISERDALGEVVAR | 10 | 6  | 7  | 12 | 13 | 16 | 20 | 7   | 2   | 6   |     |     |     |     |     |     |
| LDATEFACKL    | 7  | 11 | 22 | 20 | 16 | 23 |    |     |     |     |     |     |     |     |     |     |
| LLLLPALR      | 0  | 29 | 21 | 20 | 29 |    |    |     |     |     |     |     |     |     |     |     |
| QTVSLAQPTPK   | 1  | 13 | 4  | 18 | 8  | 36 | 11 | 9   |     |     |     |     |     |     |     |     |
| TIGNVPITR     | 0  | 27 | 4  | 4  | 54 |    |    |     |     |     |     |     |     |     |     |     |
| AVPTHSQSELR   | 2  | 2  | 13 | 29 | 14 | 7  | 32 |     |     |     |     |     |     |     |     |     |
| ILDIPCK       | 32 | 10 | 58 |    |    |    |    |     |     |     |     |     |     |     |     |     |
| LLFMSK        | 5  | 6  | 89 |    |    |    |    |     |     |     |     |     |     |     |     |     |
| LLSDMYK       | 6  | 3  | 31 |    |    |    |    |     |     |     |     |     |     |     |     |     |
| QVALYFR       | 42 | 14 | 44 |    |    |    |    |     |     |     |     |     |     |     |     |     |
| SISPTIEEVFFK  | 15 | 4  | 5  | 17 | 10 | 7  | 10 | 19  | 14  |     |     |     |     |     |     |     |
| YPTOPCR       | 45 | 14 | 42 |    |    |    |    |     |     |     |     |     |     |     |     |     |

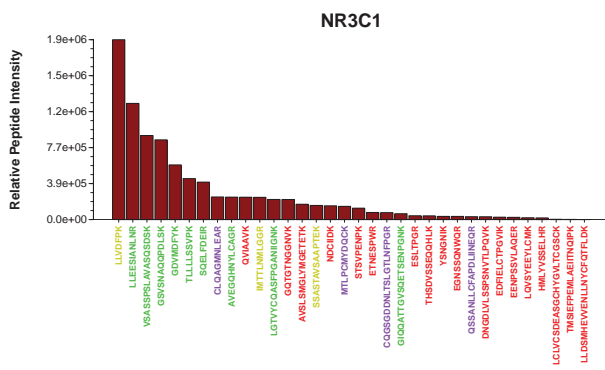

#### Relative Contribution of Transition to Signal (%)

| Peptides            | Y3 | Y4 | Y5 | Y6 | Y7 | Y8 | Y9 | Y10 | Y11 | Y12 | Y13 | Y14 | Y15 | Y16 | Y17 | Y18 |
|---------------------|----|----|----|----|----|----|----|-----|-----|-----|-----|-----|-----|-----|-----|-----|
| AVEGQHNYLCAGR       | 17 | 18 | 38 | 8  | 4  | 12 | 1  | 1   | 0   |     |     |     |     |     |     |     |
| GDVMDPK             | 9  | 26 | 47 | 18 |    |    |    |     |     |     |     |     |     |     |     |     |
| GIQDATTGVSEIENPQNK  | 3  | 48 | 10 | 1  | 8  | 5  | 2  | 2   | 13  | 1   | 6   | 2   |     |     |     |     |
| GSVSNACQDLSK        | 6  | 2  | 46 | 6  | 9  | 12 | 8  | 12  | 1   |     |     |     |     |     |     |     |
| LOTVYCOASFPGANIGNK  | 16 | 10 | 2  | 4  | 2  | 2  | 39 | 8   | 8   | 7   | 1   | 1   |     |     |     |     |
| LLFEEMALR           | 4  | 16 | 28 | 9  | 14 | 11 | 20 |     |     |     |     |     |     |     |     |     |
| SOELFDEIR           | 6  | 12 | 28 | 21 | 34 |    |    |     |     |     |     |     |     |     |     |     |
| TLLLSVPK            | 2  | 3  | 14 | 24 | 24 | 33 |    |     |     |     |     |     |     |     |     |     |
| VSASSPLAVASQDSK     | 1  | 5  | 2  | 10 | 16 | 10 | 13 | 3   | 4   | 28  | 4   | 2   | 0   |     |     |     |
| MTLNLMLGGR          | 9  | 10 | 5  | 18 | 13 | 9  | 37 |     |     |     |     |     |     |     |     |     |
| LLVDFPK             | 11 | 10 | 80 |    |    |    |    |     |     |     |     |     |     |     |     |     |
| SSASTAVSAAPTEK      | 2  | 23 | 9  | 7  | 24 | 15 | 11 | 4   | 3   | 2   |     |     |     |     |     |     |
| CLOAGMILNLR         | 5  | 3  | 7  | 5  | 29 | 32 | 19 |     |     |     |     |     |     |     |     |     |
| COSSGDNLSTLGTINFFGR | 31 | 11 | 10 | 5  | 3  | 16 | 5  | 9   | 8   | 1   | 1   |     |     |     |     |     |
| MTLPCMDQCK          | 4  | 8  | 8  | 11 | 7  | 60 | 3  |     |     |     |     |     |     |     |     |     |
| QSSANLFCFAPDLINR    | 0  | 11 | 11 | 4  | 5  | 3  | 38 | 13  | 9   | 7   |     |     |     |     |     |     |

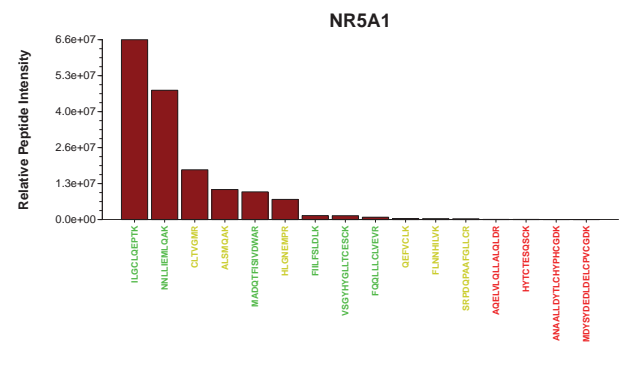

#### Relative Contribution of Transition to Signal (%)

| Peptides       | Y3 | Y4 | Y5 | Y6 | Y7 | Y8 | Y9 | Y10 | Y11 | Y12 | Y13 | Y14 | Y15 | Y16 | Y17 | Y18 |
|----------------|----|----|----|----|----|----|----|-----|-----|-----|-----|-----|-----|-----|-----|-----|
| FILFSLDK       | 8  | 70 | 2  | 1  | 9  | 10 |    |     |     |     |     |     |     |     |     |     |
| FQDLLLCLVEVR   | 11 | 7  | 6  | 16 | 23 | 17 | 10 | 10  |     |     |     |     |     |     |     |     |
| ILGCLQEPK      | 13 | 5  | 6  | 9  | 5  | 62 |    |     |     |     |     |     |     |     |     |     |
| MADQTFRISVDWAR | 9  | 11 | 9  | 6  | 27 | 16 | 13 | 7   | 1   | 1   |     |     |     |     |     |     |
| NNLLIEMLQAK    | 5  | 6  | 8  | 18 | 32 | 24 | 8  |     |     |     |     |     |     |     |     |     |
| VSYVHGLTCECK   | 12 | 4  | 8  | 14 | 11 | 4  | 27 | 17  | 3   |     |     |     |     |     |     |     |
| ALSMQAK        | 3  | 6  | 92 |    |    |    |    |     |     |     |     |     |     |     |     |     |
| CLTVGMK        | 18 | 15 | 67 |    |    |    |    |     |     |     |     |     |     |     |     |     |
| FLNNHLVK       | 14 | 11 | 11 | 14 | 50 |    |    |     |     |     |     |     |     |     |     |     |
| HLGEMPR        | 9  | 2  | 5  | 84 |    |    |    |     |     |     |     |     |     |     |     |     |
| QEFVCLK        | 50 | 22 | 27 |    |    |    |    |     |     |     |     |     |     |     |     |     |
| SRPDQPAFGLLGR  | 2  | 1  | 4  | 4  | 3  | 4  | 25 | 44  | 2   | 11  |     |     |     |     |     |     |

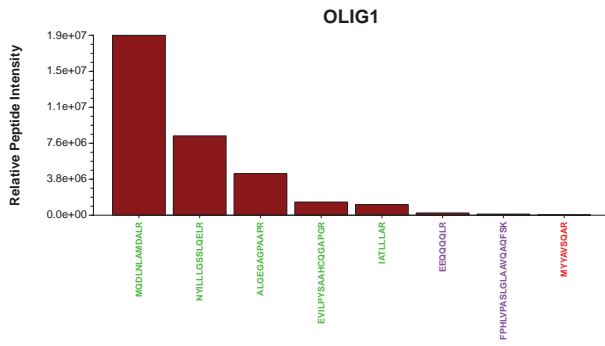

| Peptides            | Y3 | Y4 | Y5 | Y6 | Y7 | Y8 | Y9 | Y10 | Y11 | Y12 | Y13 | Y14 | Y15 | Y16 | Y17 | Y18 |
|---------------------|----|----|----|----|----|----|----|-----|-----|-----|-----|-----|-----|-----|-----|-----|
| ALGEGAPPAWR         | 5  | 1  | 13 | 24 | 7  | 25 | 4  | 21  |     |     |     |     |     |     |     |     |
| EVILPYSAHQGAPQR     | 15 | 2  | 6  | 3  | 8  | 9  | 7  | 6   | 7   | 3   | 34  | 1   |     |     |     |     |
| IATLLLAR            | 10 | 28 | 15 | 47 |    |    |    |     |     |     |     |     |     |     |     |     |
| MODLNLAMDALR        | 9  | 6  | 10 | 24 | 10 | 15 | 6  | 19  |     |     |     |     |     |     |     |     |
| NYILLGSSLOELR       | 3  | 4  | 4  | 5  | 9  | 40 | 16 | 10  | 8   | 2   |     |     |     |     |     |     |
| EEQQQLR             | 31 | 33 | 25 | 11 |    |    |    |     |     |     |     |     |     |     |     |     |
| FPHLVPASLGLAAVQAFSK | 8  | 4  | 7  | 7  | 6  | 8  | 6  | 2   | 8   | 4   | 3   | 1   | 35  |     |     |     |

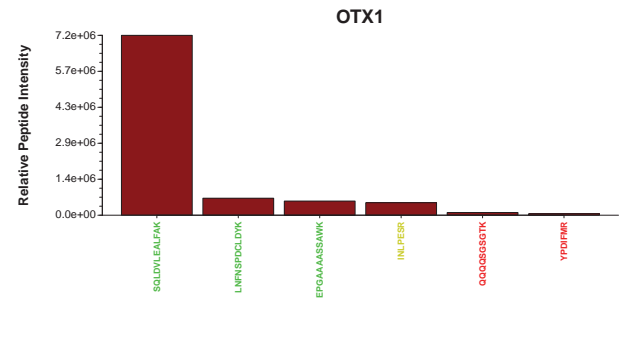

| Peptides    | Y3 | Y4 | Y5 | Y6 | Y7 | Y8 | Y9 | Y10 | Y11 | Y12 | Y13 | Y14 | Y15 | Y16 | Y17 | Y18 |
|-------------|----|----|----|----|----|----|----|-----|-----|-----|-----|-----|-----|-----|-----|-----|
| EPGAAASSAWK | 2  | 4  | 11 | 23 | 33 | 22 | 1  | 4   |     |     |     |     |     |     |     |     |
| LNFNSPCLDYK | 8  | 3  | 9  | 3  | 34 | 19 | 14 | 11  |     |     |     |     |     |     |     |     |
| SLDVLEALFAK | 8  | 5  | 7  | 10 | 19 | 8  | 18 | 24  |     |     |     |     |     |     |     |     |
| INLPESR     | 4  | 64 | 32 |    |    |    |    |     |     |     |     |     |     |     |     |     |

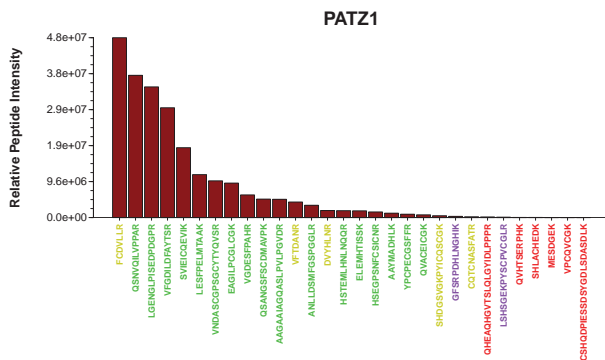

| Peptides            | Y3 | Y4 | Y5 | Y6 | Y7 | Y8 | Y9 | Y10 | Y11 | Y12 | Y13 | Y14 | Y15 | Y16 | Y17 | Y18 |
|---------------------|----|----|----|----|----|----|----|-----|-----|-----|-----|-----|-----|-----|-----|-----|
| AAGAAIAGQASLPVLQVDR | 0  | 1  | 29 | 6  | 1  | 29 | 4  | 9   | 6   | 2   | 7   | 5   | 1   |     |     |     |
| AAYMADHLK           | 9  | 6  | 34 | 29 | 21 |    |    |     |     |     |     |     |     |     |     |     |
| ANLLDSMFGSPGGLR     | 1  | 1  | 18 | 6  | 19 | 19 | 6  | 10  | 14  | 4   | 0   |     |     |     |     |     |
| EAQILPCGLCGK        | 7  | 1  | 4  | 3  | 61 | 20 | 1  | 3   |     |     |     |     |     |     |     |     |
| ELEMHTSSK           | 20 | 9  | 20 | 21 | 16 | 16 |    |     |     |     |     |     |     |     |     |     |
| HSEGFNSFCINQR       | 11 | 4  | 10 | 12 | 9  | 5  | 3  | 11  | 21  | 14  |     |     |     |     |     |     |
| HSTEMLHNLNQR        | 3  | 8  | 10 | 21 | 27 | 11 | 8  | 4   | 8   |     |     |     |     |     |     |     |
| LESFPELMTAAK        | 2  | 6  | 4  | 5  | 3  | 51 | 5  | 25  |     |     |     |     |     |     |     |     |
| LGENGLPSEDPRDQGR    | 17 | 0  | 20 | 3  | 1  | 6  | 1  | 48  | 1   | 1   | 0   | 0   |     |     |     |     |
| QSIANGSPSCDMMAPK    | 16 | 7  | 9  | 4  | 7  | 19 | 15 | 6   | 9   | 5   | 3   |     |     |     |     |     |
| QSNVQLVPPAR         | 1  | 49 | 8  | 24 | 7  | 7  | 2  |     |     |     |     |     |     |     |     |     |
| QVACEICGK           | 25 | 15 | 19 | 11 | 30 |    |    |     |     |     |     |     |     |     |     |     |
| SVIEICQEVK          | 4  | 5  | 5  | 26 | 26 | 23 | 11 |     |     |     |     |     |     |     |     |     |
| VFGDILDFAVTSR       | 5  | 8  | 8  | 14 | 20 | 23 | 6  | 2   | 13  |     |     |     |     |     |     |     |
| VGDESFFPAHR         | 4  | 59 | 14 | 20 | 6  | 4  |    |     |     |     |     |     |     |     |     |     |
| VNDASCGPSGCTYQVSR   | 12 | 18 | 12 | 10 | 8  | 5  | 9  | 2   | 12  | 13  |     |     |     |     |     |     |
| YPCPEGSSFFR         | 2  | 2  | 8  | 10 | 5  | 56 | 16 |     |     |     |     |     |     |     |     |     |
| COTCNASFATR         | 11 | 8  | 16 | 12 | 10 | 15 | 28 |     |     |     |     |     |     |     |     |     |
| DVYHLNR             | 27 | 37 | 36 |    |    |    |    |     |     |     |     |     |     |     |     |     |
| FCDVLLR             | 10 | 20 | 70 |    |    |    |    |     |     |     |     |     |     |     |     |     |
| SHDGSVKPYICSCGK     | 6  | 14 | 4  | 14 | 5  | 2  | 40 | 3   | 11  | 2   | 1   |     |     |     |     |     |
| VFTDANR             | 22 | 11 | 66 |    |    |    |    |     |     |     |     |     |     |     |     |     |
| GFSRPDHLGHK         | 5  | 16 | 12 | 7  | 49 | 1  | 10 | 0   | 0   |     |     |     |     |     |     |     |
| LSHSGEKYSPCVGCLR    | 2  | 7  | 0  | 7  | 5  | 4  | 3  | 58  | 11  | 2   |     |     |     |     |     |     |

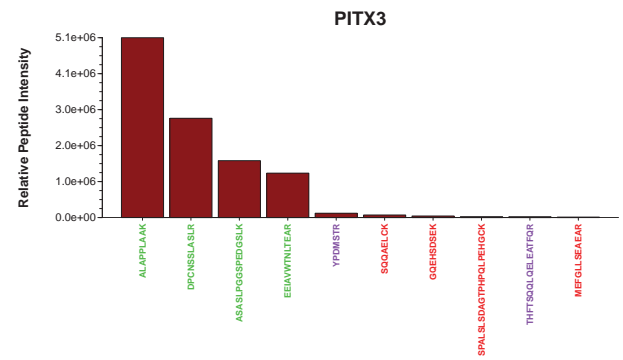

| Peptides        | Y3 | Y4 | Y5 | Y6 | Y7 | Y8 | Y9 | Y10 | Y11 | Y12 | Y13 | Y14 | Y15 | Y16 | Y17 | Y18 |
|-----------------|----|----|----|----|----|----|----|-----|-----|-----|-----|-----|-----|-----|-----|-----|
| ALAPPLAAK       | 2  | 1  | 14 | 42 | 42 |    |    |     |     |     |     |     |     |     |     |     |
| ASASLPGSPGDSGLK | 0  | 5  | 3  | 0  | 7  | 2  | 3  | 5   | 72  | 1   | 1   | 0   |     |     |     |     |
| DPCNSLALR       | 12 | 16 | 9  | 14 | 19 | 19 | 10 |     |     |     |     |     |     |     |     |     |
| EEIAVWTLTEAR    | 3  | 6  | 3  | 9  | 17 | 39 | 12 | 9   | 1   |     |     |     |     |     |     |     |
| THFTSQLELEATQR  | 13 | 11 | 23 | 15 | 5  | 5  | 10 | 10  | 5   | 2   |     |     |     |     |     |     |
| YPDMSTR         | 11 | 32 | 57 |    |    |    |    |     |     |     |     |     |     |     |     |     |

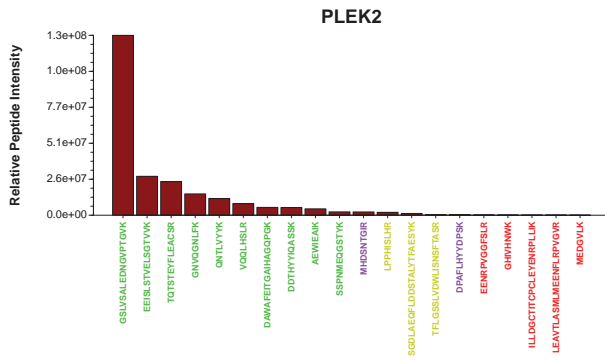

#### Relative Contribution of Transition to Signal (%)

| Peptides              | Y3 | Y4 | Y5 | Y6 | Y7 | Y8 | Y9 | Y10 | Y11 | Y12 | Y13 | Y14 | Y15 | Y16 | Y17 | Y18 |
|-----------------------|----|----|----|----|----|----|----|-----|-----|-----|-----|-----|-----|-----|-----|-----|
| AEWIEAK               | 5  | 12 | 19 | 64 |    |    |    |     |     |     |     |     |     |     |     |     |
| DAWAFETGAHAGQPK       | 27 | 1  | 5  | 7  | 10 | 4  | 3  | 13  | 14  | 7   | 5   | 3   | 1   |     |     |     |
| DDTHYIGASSK           | 13 | 13 | 8  | 10 | 24 | 28 | 3  | 0   |     |     |     |     |     |     |     |     |
| EEISLSTVELSGTVVK      | 3  | 3  | 9  | 10 | 7  | 16 | 8  | 10  | 23  | 4   | 7   | 1   |     |     |     |     |
| GNVGNLFK              | 4  | 3  | 52 | 28 | 14 |    |    |     |     |     |     |     |     |     |     |     |
| GSUSALEDNGVPTGK       | 4  | 2  | 54 | 3  | 3  | 3  | 6  | 8   | 6   | 3   | 7   | 0   | 0   |     |     |     |
| QNTLYYK               | 44 | 34 | 11 | 12 |    |    |    |     |     |     |     |     |     |     |     |     |
| SSPNMEGGSTYK          | 5  | 4  | 17 | 12 | 17 | 19 | 14 | 11  |     |     |     |     |     |     |     |     |
| TQTSTEVFLEACSR        | 6  | 16 | 13 | 12 | 14 | 14 | 6  | 5   | 5   | 7   |     |     |     |     |     |     |
| VQQLHSLR              | 15 | 24 | 19 | 42 |    |    |    |     |     |     |     |     |     |     |     |     |
| LPPHSILHR             | 1  | 13 | 12 | 28 | 46 |    |    |     |     |     |     |     |     |     |     |     |
| SDLAEGFLDDSTALYFAESYK | 13 | 9  | 15 | 10 | 18 | 15 | 8  | 6   | 3   | 3   | 2   |     |     |     |     |     |
| TFLGSSLDWLSNSFTASR    | 5  | 8  | 5  | 5  | 5  | 28 | 15 | 11  | 7   | 8   | 3   |     |     |     |     |     |
| DPAFLHYDPSK           | 62 | 5  | 4  | 7  | 12 | 6  | 3  | 0   |     |     |     |     |     |     |     |     |
| MHDSNTGIR             | 1  | 3  | 3  | 24 | 69 |    |    |     |     |     |     |     |     |     |     |     |

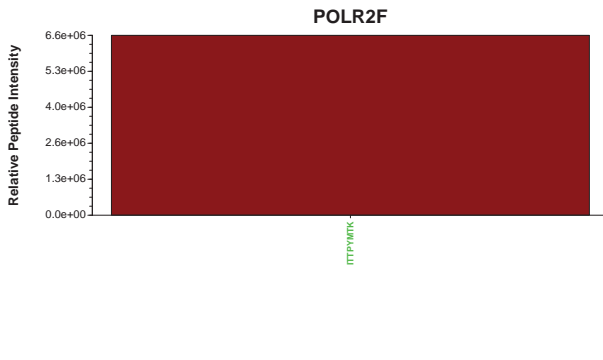

#### Relative Contribution of Transition to Signal (%)

| Peptides | Y3 | Y4 | Y5 | Y6 | Y7 | Y8 | Y9 | Y10 | Y11 | Y12 | Y13 | Y14 | Y15 | Y16 | Y17 | Y18 |
|----------|----|----|----|----|----|----|----|-----|-----|-----|-----|-----|-----|-----|-----|-----|
| ITTPYMTK | 8  | 7  | 40 | 45 |    |    |    |     |     |     |     |     |     |     |     |     |

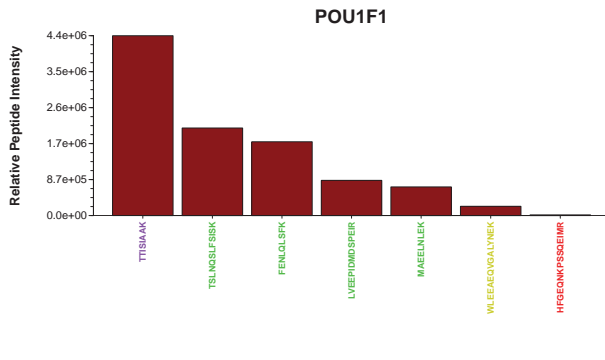

#### Relative Contribution of Transition to Signal (%)

| Peptides       | Y3 | Y4 | Y5 | Y6 | Y7 | Y8 | Y9 | Y10 | Y11 | Y12 | Y13 | Y14 | Y15 | Y16 | Y17 | Y18 |
|----------------|----|----|----|----|----|----|----|-----|-----|-----|-----|-----|-----|-----|-----|-----|
| FENLQLSFK      | 14 | 12 | 13 | 10 | 50 |    |    |     |     |     |     |     |     |     |     |     |
| LVEEPIDMSPEIR  | 0  | 9  | 15 | 9  | 8  | 13 | 3  | 39  | 3   | 1   |     |     |     |     |     |     |
| MAEELNLEK      | 5  | 11 | 14 | 20 | 49 |    |    |     |     |     |     |     |     |     |     |     |
| TSLNQLFSISK    | 4  | 17 | 14 | 8  | 22 | 10 | 20 | 6   |     |     |     |     |     |     |     |     |
| WLEEAQVQALYNEK | 9  | 14 | 9  | 4  | 31 | 11 | 5  | 8   | 6   | 2   | 0   |     |     |     |     |     |
| TTISAAK        | 4  | 11 | 24 | 61 |    |    |    |     |     |     |     |     |     |     |     |     |

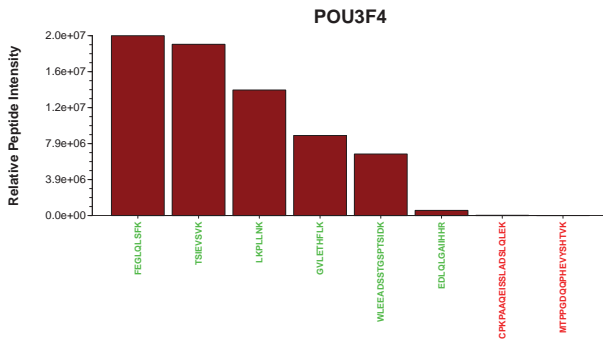

#### Relative Contribution of Transition to Signal (%)

| Peptides        | Y3 | Y4 | Y5 | Y6 | Y7 | Y8 | Y9 | Y10 | Y11 | Y12 | Y13 | Y14 | Y15 | Y16 | Y17 | Y18 |
|-----------------|----|----|----|----|----|----|----|-----|-----|-----|-----|-----|-----|-----|-----|-----|
| EDLQLGAIHHR     | 12 | 11 | 8  | 6  | 39 | 18 | 4  | 0   |     |     |     |     |     |     |     |     |
| FEGLQLSFK       | 8  | 7  | 9  | 3  | 72 |    |    |     |     |     |     |     |     |     |     |     |
| GVLETHFLK       | 8  | 7  | 23 | 28 | 34 |    |    |     |     |     |     |     |     |     |     |     |
| LKPLLNK         | 4  | 1  | 95 |    |    |    |    |     |     |     |     |     |     |     |     |     |
| TSIEVSVK        | 6  | 10 | 29 | 55 |    |    |    |     |     |     |     |     |     |     |     |     |
| WLEEADSTGSPSIDK | 4  | 7  | 1  | 21 | 6  | 13 | 9  | 9   | 11  | 11  | 7   | 2   |     |     |     |     |

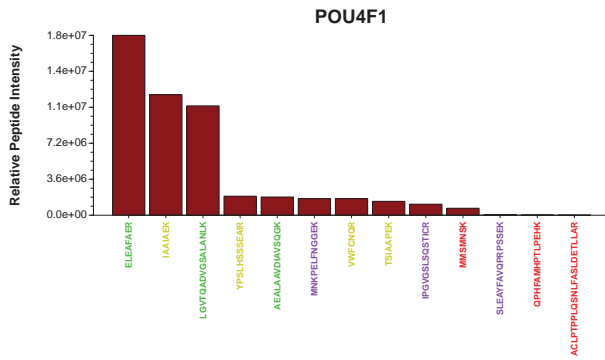

| Peptides          | Relative Contribution of Transition to Signal (%) |    |    |    |    |    |    |     |     |     |     |     |     |     |     |     |  |  |
|-------------------|---------------------------------------------------|----|----|----|----|----|----|-----|-----|-----|-----|-----|-----|-----|-----|-----|--|--|
|                   | Y3                                                | Y4 | Y5 | Y6 | Y7 | Y8 | Y9 | Y10 | Y11 | Y12 | Y13 | Y14 | Y15 | Y16 | Y17 | Y18 |  |  |
| AEALAVDIVSQGK     | 3                                                 | 16 | 7  | 8  | 5  | 14 | 14 | 17  | 12  | 2   | 1   |     |     |     |     |     |  |  |
| ELEFAER           | 29                                                | 30 | 23 | 18 |    |    |    |     |     |     |     |     |     |     |     |     |  |  |
| LGVTQADVGSALANLK  | 6                                                 | 9  | 4  | 4  | 5  | 25 | 8  | 15  | 17  | 5   | 3   | 0   |     |     |     |     |  |  |
| IAIAIAEK          | 10                                                | 8  | 82 |    |    |    |    |     |     |     |     |     |     |     |     |     |  |  |
| TSAIAPEK          | 18                                                | 13 | 33 | 35 |    |    |    |     |     |     |     |     |     |     |     |     |  |  |
| VWFENQR           | 4                                                 | 17 | 78 |    |    |    |    |     |     |     |     |     |     |     |     |     |  |  |
| YPSLHSSSEAIR      | 5                                                 | 6  | 3  | 9  | 29 | 29 | 6  | 13  |     |     |     |     |     |     |     |     |  |  |
| IPOVGLSLSOSTICR   | 2                                                 | 4  | 7  | 6  | 20 | 7  | 8  | 31  | 3   | 12  |     |     |     |     |     |     |  |  |
| MNKPELNGGEK       | 1                                                 | 4  | 4  | 6  | 6  | 5  | 72 | 3   |     |     |     |     |     |     |     |     |  |  |
| SLEAYFAVQPRPSSSEK | 0                                                 | 0  | 4  | 1  | 30 | 16 | 13 | 19  | 14  | 1   | 1   |     |     |     |     |     |  |  |

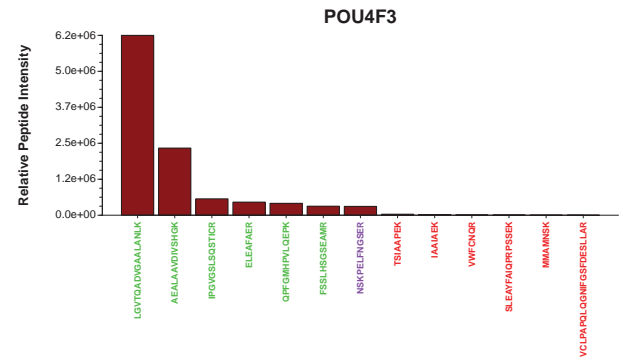

| Peptides         | Relative Contribution of Transition to Signal (%) |    |    |    |    |    |    |     |     |     |     |     |     |     |     |     |  |  |
|------------------|---------------------------------------------------|----|----|----|----|----|----|-----|-----|-----|-----|-----|-----|-----|-----|-----|--|--|
|                  | Y3                                                | Y4 | Y5 | Y6 | Y7 | Y8 | Y9 | Y10 | Y11 | Y12 | Y13 | Y14 | Y15 | Y16 | Y17 | Y18 |  |  |
| AEALAVDIVSHQK    | 4                                                 | 13 | 10 | 5  | 13 | 13 | 19 | 19  | 3   | 2   |     |     |     |     |     |     |  |  |
| ELEFAER          | 24                                                | 32 | 26 | 18 |    |    |    |     |     |     |     |     |     |     |     |     |  |  |
| FSSLHSGSEAMR     | 6                                                 | 1  | 2  | 12 | 38 | 34 | 3  | 4   |     |     |     |     |     |     |     |     |  |  |
| IPOVGLSLSOSTICR  | 2                                                 | 4  | 7  | 5  | 21 | 8  | 8  | 28  | 3   | 13  |     |     |     |     |     |     |  |  |
| LGVTQADVGSALANLK | 5                                                 | 9  | 5  | 6  | 4  | 25 | 8  | 14  | 16  | 5   | 3   | 0   |     |     |     |     |  |  |
| QPFGMHPVLOEPEK   | 6                                                 | 6  | 8  | 2  | 50 | 13 | 2  | 6   | 7   |     |     |     |     |     |     |     |  |  |
| NSKPELFGSER      | 1                                                 | 3  | 3  | 5  | 7  | 2  | 80 | 1   |     |     |     |     |     |     |     |     |  |  |

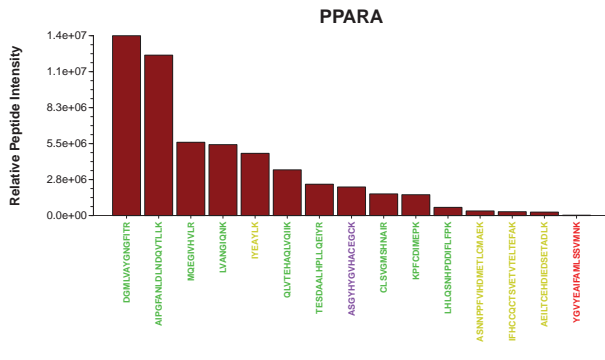

| Peptides             | Relative Contribution of Transition to Signal (%) |    |    |    |    |    |    |     |     |     |     |     |     |     |     |     |  |  |
|----------------------|---------------------------------------------------|----|----|----|----|----|----|-----|-----|-----|-----|-----|-----|-----|-----|-----|--|--|
|                      | Y3                                                | Y4 | Y5 | Y6 | Y7 | Y8 | Y9 | Y10 | Y11 | Y12 | Y13 | Y14 | Y15 | Y16 | Y17 | Y18 |  |  |
| AIFQFANLDINDOVTLTK   | 21                                                | 15 | 3  | 6  | 4  | 9  | 10 | 18  | 5   | 6   | 3   |     |     |     |     |     |  |  |
| CLSVGMSHNAIR         | 3                                                 | 5  | 5  | 11 | 6  | 37 | 10 | 24  |     |     |     |     |     |     |     |     |  |  |
| DOMLVAYGNIFTR        | 4                                                 | 2  | 3  | 3  | 19 | 18 | 35 | 13  | 2   | 0   |     |     |     |     |     |     |  |  |
| KPFCDIMEPK           | 10                                                | 8  | 19 | 7  | 31 | 26 |    |     |     |     |     |     |     |     |     |     |  |  |
| LHLQSNHPDDILFPK      | 35                                                | 9  | 7  | 12 | 6  | 1  | 22 | 3   | 2   | 4   |     |     |     |     |     |     |  |  |
| LVANGIQNK            | 4                                                 | 2  | 8  | 12 | 74 |    |    |     |     |     |     |     |     |     |     |     |  |  |
| MEGEIVHRLR           | 5                                                 | 16 | 22 | 4  | 20 | 33 |    |     |     |     |     |     |     |     |     |     |  |  |
| QLVTEHAQLVQIK        | 9                                                 | 17 | 8  | 6  | 8  | 16 | 17 | 5   | 11  | 4   |     |     |     |     |     |     |  |  |
| TESDAALHPLLOEYR      | 3                                                 | 2  | 3  | 4  | 2  | 59 | 19 | 5   | 2   | 0   |     |     |     |     |     |     |  |  |
| AEULTCEHDIEDSETADLK  | 15                                                | 11 | 12 | 4  | 22 | 7  | 6  | 8   | 8   | 7   |     |     |     |     |     |     |  |  |
| ASNNPPFVHDMETLCMAEK  | 16                                                | 13 | 17 | 5  | 9  | 3  | 7  | 9   | 14  | 7   |     |     |     |     |     |     |  |  |
| IFHCDOCTSVETYTELFEAK | 18                                                | 10 | 19 | 11 | 4  | 15 | 3  | 7   | 8   | 2   | 2   |     |     |     |     |     |  |  |
| IVEAYLK              | 6                                                 | 18 | 75 |    |    |    |    |     |     |     |     |     |     |     |     |     |  |  |
| ASGYHYGHVHACEGK      | 16                                                | 5  | 10 | 14 | 16 | 3  | 19 | 14  | 4   | 0   |     |     |     |     |     |     |  |  |

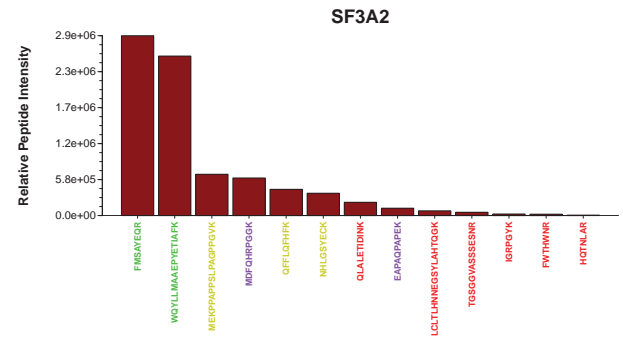

| Peptides           | Relative Contribution of Transition to Signal (%) |    |    |    |    |    |    |     |     |     |     |     |     |     |     |     |  |  |
|--------------------|---------------------------------------------------|----|----|----|----|----|----|-----|-----|-----|-----|-----|-----|-----|-----|-----|--|--|
|                    | Y3                                                | Y4 | Y5 | Y6 | Y7 | Y8 | Y9 | Y10 | Y11 | Y12 | Y13 | Y14 | Y15 | Y16 | Y17 | Y18 |  |  |
| FMSAYEQR           | 5                                                 | 13 | 9  | 73 |    |    |    |     |     |     |     |     |     |     |     |     |  |  |
| WQYLLMAAEPIETIAFK  | 7                                                 | 20 | 4  | 1  | 1  | 19 | 9  | 13  | 12  | 10  | 3   |     |     |     |     |     |  |  |
| MEKPPAPPSLPAGPPGVK | 1                                                 | 4  | 8  | 5  | 1  | 17 | 2  | 2   | 6   | 33  | 3   | 8   | 11  |     |     |     |  |  |
| NHLQSYECK          | 4                                                 | 3  | 6  | 51 | 37 |    |    |     |     |     |     |     |     |     |     |     |  |  |
| QFFLQHFHK          | 14                                                | 24 | 19 | 19 | 24 |    |    |     |     |     |     |     |     |     |     |     |  |  |
| EAPAQPAPEK         | 55                                                | 4  | 24 | 4  | 4  | 9  |    |     |     |     |     |     |     |     |     |     |  |  |
| MDFQHRPQEK         | 5                                                 | 19 | 6  | 17 | 3  | 50 |    |     |     |     |     |     |     |     |     |     |  |  |

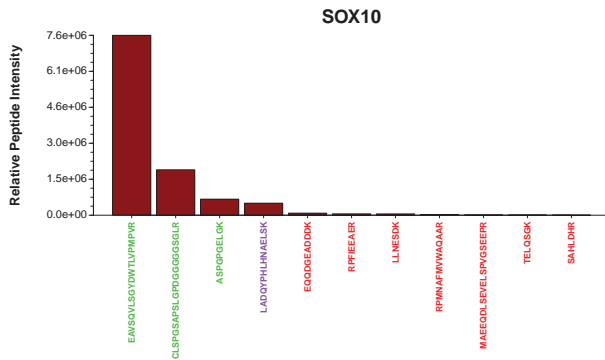

| Peptides              | Y3 | Y4 | Y5 | Y6 | Y7 | Y8 | Y9 | Y10 | Y11 | Y12 | Y13 | Y14 | Y15 | Y16 | Y17 | Y18 |
|-----------------------|----|----|----|----|----|----|----|-----|-----|-----|-----|-----|-----|-----|-----|-----|
| ASPFGELQK             | 7  | 1  | 4  | 27 | 29 | 32 |    |     |     |     |     |     |     |     |     |     |
| CLSPGSAFSLGPDGGGGGSLR | 2  | 2  | 1  | 2  | 2  | 2  | 16 | 1   | 7   | 21  | 4   | 2   | 33  | 4   | 1   | 0   |
| EAVSGLVSGYDWTLPMPVR   | 7  | 1  | 62 | 12 | 3  | 3  | 4  | 3   | 2   | 3   |     |     |     |     |     |     |
| LADYPHLHNAELSK        | 13 | 5  | 6  | 8  | 15 | 7  | 5  | 39  | 3   | 0   |     |     |     |     |     |     |

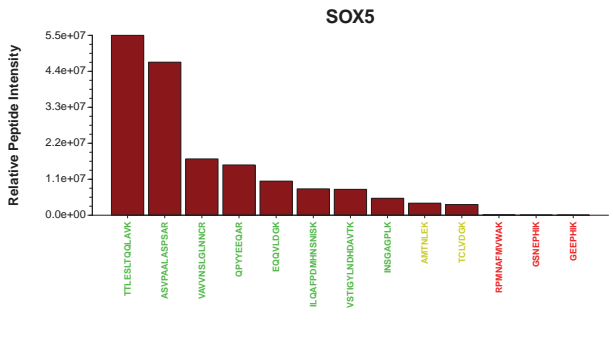

| Peptides       | Y3 | Y4 | Y5 | Y6 | Y7 | Y8 | Y9 | Y10 | Y11 | Y12 | Y13 | Y14 | Y15 | Y16 | Y17 | Y18 |
|----------------|----|----|----|----|----|----|----|-----|-----|-----|-----|-----|-----|-----|-----|-----|
| ASYPALASPEAR   | 28 | 41 | 19 | 11 |    |    |    |     |     |     |     |     |     |     |     |     |
| VAVVNSLGLNCR   | 9  | 2  | 3  | 5  | 5  | 8  | 3  | 50  | 9   | 6   | 0   |     |     |     |     |     |
| TLESLTQLAIK    | 12 | 7  | 6  | 7  | 22 | 8  | 22 | 11  | 5   |     |     |     |     |     |     |     |
| VSTIGYLNDHDVTK | 4  | 10 | 5  | 10 | 5  | 15 | 15 | 8   | 25  | 2   | 1   |     |     |     |     |     |
| AMTNLEK        | 5  | 7  | 88 |    |    |    |    |     |     |     |     |     |     |     |     |     |
| TCLVDGK        | 19 | 19 | 62 |    |    |    |    |     |     |     |     |     |     |     |     |     |

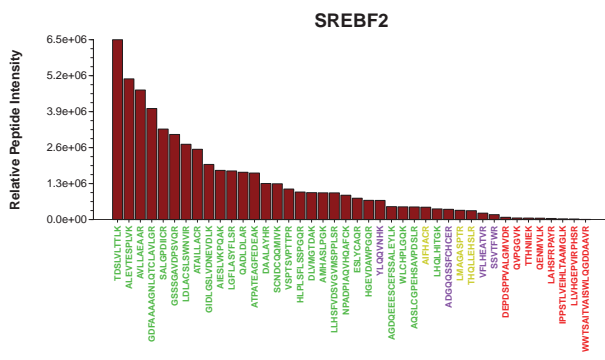

| Peptides            | Y3 | Y4 | Y5 | Y6 | Y7 | Y8 | Y9 | Y10 | Y11 | Y12 | Y13 | Y14 | Y15 | Y16 | Y17 | Y18 |
|---------------------|----|----|----|----|----|----|----|-----|-----|-----|-----|-----|-----|-----|-----|-----|
| AGDDEEESCFSSALEYIK  | 17 | 16 | 10 | 7  | 9  | 16 | 9  | 6   | 6   | 7   |     |     |     |     |     |     |
| AVLLAEAR            | 1  | 36 | 15 | 19 | 6  | 11 | 13 |     |     |     |     |     |     |     |     |     |
| GDFPAAAGNLOTCLAVLGR | 1  | 11 | 13 | 11 | 32 | 18 | 14 |     |     |     |     |     |     |     |     |     |
| AVLLAEAR            | 43 | 4  | 12 | 28 | 14 |    |    |     |     |     |     |     |     |     |     |     |
| AVLLAEAR            | 18 | 1  | 39 | 4  | 9  | 10 | 6  | 1   | 6   | 7   | 4   |     |     |     |     |     |
| AVLLAEAR            | 15 | 27 | 36 | 10 | 12 |    |    |     |     |     |     |     |     |     |     |     |
| AVLLAEAR            | 4  | 5  | 4  | 5  | 22 | 19 | 9  | 19  | 5   | 7   |     |     |     |     |     |     |
| AVLLAEAR            | 5  | 9  | 39 | 23 | 24 |    |    |     |     |     |     |     |     |     |     |     |
| AVLLAEAR            | 18 | 46 | 22 | 13 |    |    |    |     |     |     |     |     |     |     |     |     |
| AVLLAEAR            | 1  | 1  | 21 | 43 | 32 |    |    |     |     |     |     |     |     |     |     |     |
| AVLLAEAR            | 21 | 45 | 28 | 6  |    |    |    |     |     |     |     |     |     |     |     |     |
| GDFPAAAGNLOTCLAVLGR | 18 | 13 | 9  | 3  | 5  | 9  | 9  | 5   | 4   | 15  | 7   | 3   |     |     |     |     |
| GDFPAAAGNLOTCLAVLGR | 9  | 5  | 2  | 7  | 18 | 23 | 9  | 8   | 17  | 1   | 1   |     |     |     |     |     |
| GDFPAAAGNLOTCLAVLGR | 2  | 2  | 53 | 17 | 12 | 5  | 7  | 2   | 1   |     |     |     |     |     |     |     |
| GDFPAAAGNLOTCLAVLGR | 1  | 26 | 9  | 29 | 15 | 11 | 10 |     |     |     |     |     |     |     |     |     |
| GDFPAAAGNLOTCLAVLGR | 0  | 5  | 4  | 5  | 4  | 2  | 6  | 1   | 73  |     |     |     |     |     |     |     |
| GDFPAAAGNLOTCLAVLGR | 3  | 9  | 10 | 23 | 8  | 17 | 19 | 9   | 1   |     |     |     |     |     |     |     |
| GDFPAAAGNLOTCLAVLGR | 3  | 8  | 9  | 26 | 39 | 13 | 2  |     |     |     |     |     |     |     |     |     |
| GDFPAAAGNLOTCLAVLGR | 21 | 13 | 13 | 17 | 36 |    |    |     |     |     |     |     |     |     |     |     |
| GDFPAAAGNLOTCLAVLGR | 0  | 2  | 22 | 11 | 9  | 3  | 19 | 4   | 11  | 9   | 7   | 2   |     |     |     |     |
| GDFPAAAGNLOTCLAVLGR | 6  | 8  | 6  | 15 | 8  | 5  | 12 | 3   | 31  | 5   | 1   |     |     |     |     |     |
| GDFPAAAGNLOTCLAVLGR | 27 | 41 | 12 | 19 |    |    |    |     |     |     |     |     |     |     |     |     |
| GDFPAAAGNLOTCLAVLGR | 11 | 11 | 7  | 26 | 40 | 6  |    |     |     |     |     |     |     |     |     |     |
| GDFPAAAGNLOTCLAVLGR | 15 | 15 | 9  | 7  | 13 | 12 | 28 |     |     |     |     |     |     |     |     |     |
| GDFPAAAGNLOTCLAVLGR | 5  | 11 | 23 | 29 | 7  | 26 |    |     |     |     |     |     |     |     |     |     |
| GDFPAAAGNLOTCLAVLGR | 4  | 3  |    | 16 | 42 | 16 | 19 |     |     |     |     |     |     |     |     |     |

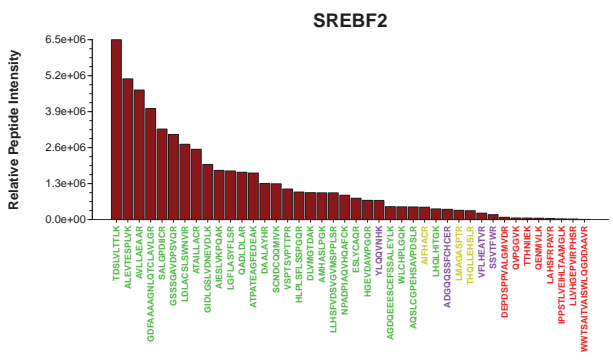

| Peptides     | Y3 | Y4 | Y5 | Y6 | Y7 | Y8 | Y9 | Y10 | Y11 | Y12 | Y13 | Y14 | Y15 | Y16 | Y17 | Y18 |
|--------------|----|----|----|----|----|----|----|-----|-----|-----|-----|-----|-----|-----|-----|-----|
| WLCNPLQK     | 10 | 6  | 39 | 11 | 34 |    |    |     |     |     |     |     |     |     |     |     |
| AIFHACR      | 30 | 28 | 42 |    |    |    |    |     |     |     |     |     |     |     |     |     |
| LMAQASPTR    | 7  | 8  | 5  | 19 | 61 |    |    |     |     |     |     |     |     |     |     |     |
| THQLLESLR    | 5  | 14 | 10 | 15 | 20 | 35 |    |     |     |     |     |     |     |     |     |     |
| ADGQSSFFCHCR | 14 | 15 | 13 | 12 | 13 | 25 | 7  | 0   | 0   |     |     |     |     |     |     |     |
| SSVTFWR      | 17 | 56 | 27 |    |    |    |    |     |     |     |     |     |     |     |     |     |
| VFLHEATVR    | 2  | 20 | 33 | 28 | 16 |    |    |     |     |     |     |     |     |     |     |     |
| YLQGVNKK     | 13 | 38 | 16 | 32 |    |    |    |     |     |     |     |     |     |     |     |     |

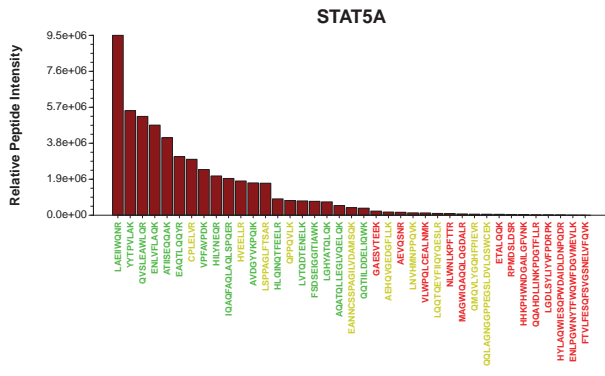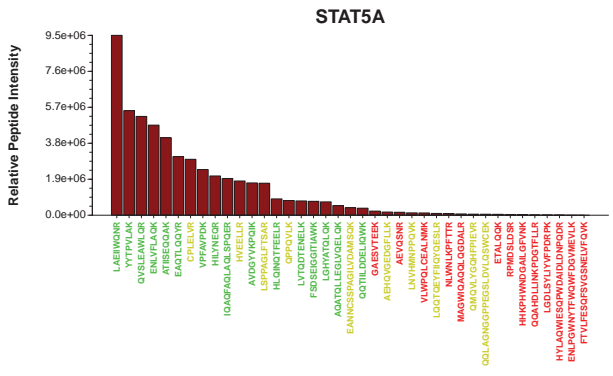

(Page 1)

| Peptides            | Relative Contribution of Transition to Signal (%) |    |    |    |    |    |    |     |     |     |     |     |     |     |     |     |
|---------------------|---------------------------------------------------|----|----|----|----|----|----|-----|-----|-----|-----|-----|-----|-----|-----|-----|
|                     | Y3                                                | Y4 | Y5 | Y6 | Y7 | Y8 | Y9 | Y10 | Y11 | Y12 | Y13 | Y14 | Y15 | Y16 | Y17 | Y18 |
| AGATLLEGLVQELQK     | 7                                                 | 11 | 10 | 13 | 3  | 19 | 14 | 14  | 6   | 2   | 1   |     |     |     |     |     |
| ATISEQQAQ           | 2                                                 | 4  | 7  | 48 | 30 | 8  |    |     |     |     |     |     |     |     |     |     |
| AVDGYVKPQIK         | 1                                                 | 39 | 15 | 16 | 4  | 7  | 19 |     |     |     |     |     |     |     |     |     |
| EAQTLOQYR           | 17                                                | 39 | 17 | 23 | 4  |    |    |     |     |     |     |     |     |     |     |     |
| ENLVFLAQK           | 11                                                | 14 | 48 | 20 | 7  |    |    |     |     |     |     |     |     |     |     |     |
| FSDSEIGGITAWK       | 14                                                | 5  | 8  | 3  | 8  | 36 | 17 | 3   | 3   | 3   |     |     |     |     |     |     |
| HILYNEQR            | 1                                                 | 5  | 16 | 79 |    |    |    |     |     |     |     |     |     |     |     |     |
| HLQINQTFEELR        | 4                                                 | 3  | 4  | 6  | 4  | 19 | 20 | 38  |     |     |     |     |     |     |     |     |
| IQAGFQAQLQSLSPQER   | 1                                                 | 29 | 23 | 8  | 8  | 13 | 6  | 5   | 5   | 3   |     |     |     |     |     |     |
| LAEIQWR             | 10                                                | 37 | 31 | 12 | 11 |    |    |     |     |     |     |     |     |     |     |     |
| LGHYATQLQK          | 8                                                 | 4  | 12 | 33 | 45 | 1  |    |     |     |     |     |     |     |     |     |     |
| LVTQDTENELK         | 2                                                 | 6  | 4  | 13 | 27 | 7  | 40 |     |     |     |     |     |     |     |     |     |
| QQTILDEDELQWK       | 12                                                | 11 | 5  | 4  | 5  | 15 | 24 | 18  | 2   | 3   |     |     |     |     |     |     |
| QVBLEAWLR           | 10                                                | 14 | 24 | 18 | 5  | 29 |    |     |     |     |     |     |     |     |     |     |
| VPFVAPDK            | 39                                                | 8  | 19 | 34 |    |    |    |     |     |     |     |     |     |     |     |     |
| YYTFVPLAK           | 9                                                 | 3  | 28 | 59 |    |    |    |     |     |     |     |     |     |     |     |     |
| AEHVGEDGFLFK        | 8                                                 | 1  | 19 | 8  | 1  | 26 | 27 | 7   | 2   |     |     |     |     |     |     |     |
| CPLELVR             | 24                                                | 35 | 42 |    |    |    |    |     |     |     |     |     |     |     |     |     |
| EANNSSPAGSLVADAMSQK | 11                                                | 6  | 9  | 16 | 8  | 16 | 2  | 6   | 1   | 19  | 4   | 3   |     |     |     |     |
| HVEELLR             | 10                                                | 13 | 78 |    |    |    |    |     |     |     |     |     |     |     |     |     |
| LNVMNPPQVK          | 1                                                 | 8  | 49 | 12 | 16 | 11 | 3  |     |     |     |     |     |     |     |     |     |
| LQQTQEIFYIQYESLR    | 6                                                 | 6  | 7  | 14 | 17 | 20 | 13 | 12  | 5   |     |     |     |     |     |     |     |
| LSPPALQTSAR         | 2                                                 | 5  | 11 | 3  | 16 | 17 | 35 | 11  |     |     |     |     |     |     |     |     |
| QMVLYGQHPFIEVR      | 3                                                 | 1  | 35 | 12 | 9  | 2  | 19 | 15  | 3   | 2   |     |     |     |     |     |     |
| QPPVLLK             | 27                                                | 8  | 65 |    |    |    |    |     |     |     |     |     |     |     |     |     |

(Page 2)

| Peptides             | Relative Contribution of Transition to Signal (%) |    |    |    |    |    |    |     |     |     |     |     |     |     |     |     |
|----------------------|---------------------------------------------------|----|----|----|----|----|----|-----|-----|-----|-----|-----|-----|-----|-----|-----|
|                      | Y3                                                | Y4 | Y5 | Y6 | Y7 | Y8 | Y9 | Y10 | Y11 | Y12 | Y13 | Y14 | Y15 | Y16 | Y17 | Y18 |
| QQLAGNGPPESLDVLSWCEK | 15                                                | 10 | 33 | 12 | 11 | 6  | 1  | 1   | 4   | 4   |     |     |     |     |     |     |

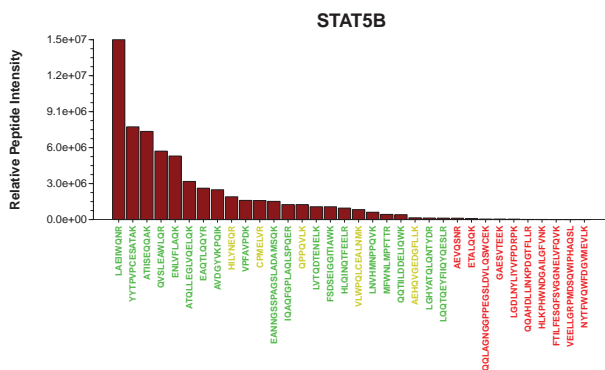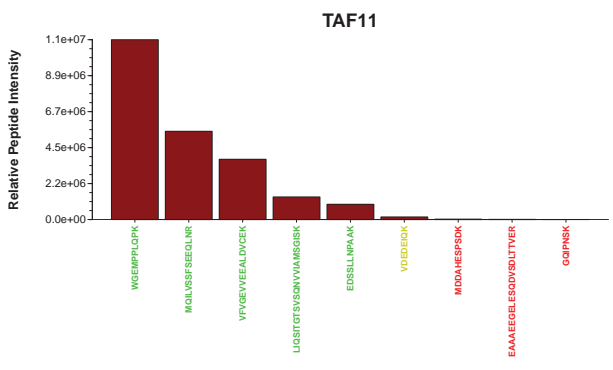

| Peptides           | Relative Contribution of Transition to Signal (%) |    |    |    |    |    |    |     |     |     |     |     |     |     |     |     |
|--------------------|---------------------------------------------------|----|----|----|----|----|----|-----|-----|-----|-----|-----|-----|-----|-----|-----|
|                    | Y3                                                | Y4 | Y5 | Y6 | Y7 | Y8 | Y9 | Y10 | Y11 | Y12 | Y13 | Y14 | Y15 | Y16 | Y17 | Y18 |
| ATISEQQAQ          | 2                                                 | 4  | 7  | 49 | 30 | 8  |    |     |     |     |     |     |     |     |     |     |
| ATLLEGLVQELQK      | 6                                                 | 9  | 10 | 14 | 4  | 24 | 20 | 10  | 3   | 0   |     |     |     |     |     |     |
| AVDGYVKPQIK        | 1                                                 | 34 | 15 | 18 | 4  | 8  | 19 |     |     |     |     |     |     |     |     |     |
| EANNSSPAGSLADAMSQK | 12                                                | 7  | 8  | 7  | 8  | 4  | 2  | 10  | 2   | 27  | 7   | 2   | 3   |     |     |     |
| EAQTLOQYR          | 16                                                | 39 | 16 | 23 | 6  |    |    |     |     |     |     |     |     |     |     |     |
| ENLVFLAQK          | 10                                                | 14 | 48 | 20 | 8  |    |    |     |     |     |     |     |     |     |     |     |
| FSDSEIGGITAWK      | 13                                                | 4  | 8  | 2  | 9  | 37 | 17 | 4   | 3   | 3   |     |     |     |     |     |     |
| HLQINQTFEELR       | 5                                                 | 3  | 4  | 6  | 5  | 20 | 20 | 36  |     |     |     |     |     |     |     |     |
| IQAGFQAQLQSLSPQER  | 1                                                 | 22 | 17 | 7  | 8  | 7  | 1  | 12  | 18  | 7   | 1   |     |     |     |     |     |
| LAEIQWR            | 9                                                 | 37 | 31 | 12 | 11 |    |    |     |     |     |     |     |     |     |     |     |
| LGHYATQLQNTYDR     | 3                                                 | 5  | 8  | 7  | 12 | 7  | 15 | 30  | 13  |     |     |     |     |     |     |     |
| LNVMNPPQVK         | 1                                                 | 7  | 41 | 17 | 17 | 13 | 3  |     |     |     |     |     |     |     |     |     |
| LQQTQEIFYIQYESLR   | 5                                                 | 7  | 5  | 15 | 17 | 24 | 13 | 8   | 5   |     |     |     |     |     |     |     |
| LVTQDTENELK        | 2                                                 | 6  | 4  | 12 | 29 | 8  | 40 |     |     |     |     |     |     |     |     |     |
| LNVMNPPQVK         | 2                                                 | 1  | 41 | 29 | 11 | 12 | 5  |     |     |     |     |     |     |     |     |     |
| QQTILDEDELQWK      | 11                                                | 8  | 4  | 5  | 6  | 18 | 25 | 17  | 3   | 3   |     |     |     |     |     |     |
| QVBLEAWLR          | 10                                                | 14 | 23 | 18 | 5  | 30 |    |     |     |     |     |     |     |     |     |     |
| VPFVAPDK           | 38                                                | 8  | 19 | 36 |    |    |    |     |     |     |     |     |     |     |     |     |
| YYTFVPLAK          | 1                                                 | 1  | 3  | 6  | 2  | 45 | 3  | 33  | 7   |     |     |     |     |     |     |     |
| AEHVGEDGFLFK       | 6                                                 | 2  | 18 | 5  | 2  | 31 | 28 | 8   | 1   |     |     |     |     |     |     |     |
| CPMELVR            | 22                                                | 30 | 48 |    |    |    |    |     |     |     |     |     |     |     |     |     |
| HILYNEQR           | 1                                                 | 4  | 15 | 80 |    |    |    |     |     |     |     |     |     |     |     |     |
| QPPVLLK            | 24                                                | 11 | 65 |    |    |    |    |     |     |     |     |     |     |     |     |     |
| VLWVQLCEALNMK      | 6                                                 | 4  | 6  | 3  | 8  | 14 | 3  | 52  | 2   |     |     |     |     |     |     |     |

| Peptides               | Relative Contribution of Transition to Signal (%) |    |    |    |    |    |    |     |     |     |     |     |     |     |     |     |
|------------------------|---------------------------------------------------|----|----|----|----|----|----|-----|-----|-----|-----|-----|-----|-----|-----|-----|
|                        | Y3                                                | Y4 | Y5 | Y6 | Y7 | Y8 | Y9 | Y10 | Y11 | Y12 | Y13 | Y14 | Y15 | Y16 | Y17 | Y18 |
| EDSSLNPAK              | 1                                                 | 26 | 18 | 34 | 10 | 5  | 6  |     |     |     |     |     |     |     |     |     |
| LQISITQTSVSNVVIAMSGISK | 2                                                 | 7  | 15 | 11 | 24 | 12 | 7  | 2   | 4   | 2   | 11  | 3   |     |     |     |     |
| MQLNSFSQQLNR           | 4                                                 | 6  | 5  | 4  | 11 | 8  | 10 | 32  | 13  | 7   |     |     |     |     |     |     |
| VPFVVEEALDVKK          | 16                                                | 11 | 13 | 8  | 9  | 7  | 13 | 14  | 5   | 1   | 2   |     |     |     |     |     |
| WQEMPLQPK              | 2                                                 | 1  | 7  | 73 | 10 | 7  |    |     |     |     |     |     |     |     |     |     |
| VDEIEIOL               | 10                                                | 10 | 23 | 58 |    |    |    |     |     |     |     |     |     |     |     |     |

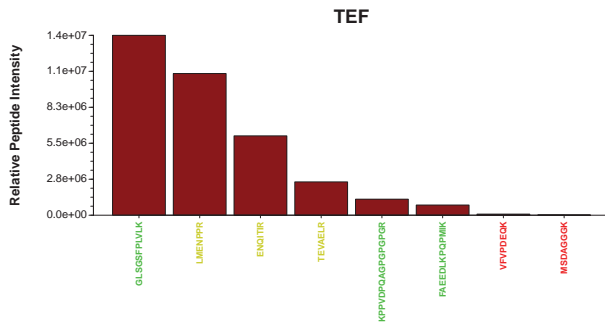

| Peptides       | Relative Contribution of Transition to Signal (%) |    |    |    |    |    |    |     |     |     |     |     |     |     |     |     |
|----------------|---------------------------------------------------|----|----|----|----|----|----|-----|-----|-----|-----|-----|-----|-----|-----|-----|
|                | Y3                                                | Y4 | Y5 | Y6 | Y7 | Y8 | Y9 | Y10 | Y11 | Y12 | Y13 | Y14 | Y15 | Y16 | Y17 | Y18 |
| FAEDLKPOPMK    | 2                                                 | 30 | 1  | 38 | 11 | 7  | 6  | 3   | 2   |     |     |     |     |     |     |     |
| GLSGFPLVK      | 4                                                 | 1  | 24 | 12 | 10 | 14 | 35 |     |     |     |     |     |     |     |     |     |
| KPPVDQAGPQPPGR | 1                                                 | 0  | 2  | 1  | 3  | 5  | 3  | 1   | 68  | 4   | 2   | 10  |     |     |     |     |
| ENQITR         | 63                                                | 25 | 12 |    |    |    |    |     |     |     |     |     |     |     |     |     |
| LMENPR         | 22                                                | 23 | 55 |    |    |    |    |     |     |     |     |     |     |     |     |     |
| TEVAELR        | 5                                                 | 29 | 66 |    |    |    |    |     |     |     |     |     |     |     |     |     |

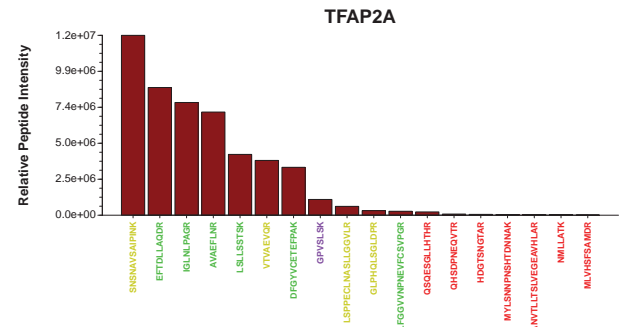

| Peptides         | Relative Contribution of Transition to Signal (%) |    |    |    |    |    |    |     |     |     |     |     |     |     |     |     |
|------------------|---------------------------------------------------|----|----|----|----|----|----|-----|-----|-----|-----|-----|-----|-----|-----|-----|
|                  | Y3                                                | Y4 | Y5 | Y6 | Y7 | Y8 | Y9 | Y10 | Y11 | Y12 | Y13 | Y14 | Y15 | Y16 | Y17 | Y18 |
| AWAELNR          | 6                                                 | 26 | 12 | 56 |    |    |    |     |     |     |     |     |     |     |     |     |
| DFGYICETFPK      | 24                                                | 11 | 3  | 6  | 5  | 26 | 20 | 1   | 4   |     |     |     |     |     |     |     |
| DNLFGVWVNFVCSVPR | 51                                                | 5  | 7  | 7  | 6  | 3  | 1  | 1   | 16  | 4   | 0   |     |     |     |     |     |
| EFTDLAQR         | 9                                                 | 38 | 26 | 9  | 8  | 11 |    |     |     |     |     |     |     |     |     |     |
| IGLNLPAGR        | 2                                                 | 57 | 13 | 24 | 5  |    |    |     |     |     |     |     |     |     |     |     |
| LSLSSTSK         | 2                                                 | 6  | 30 | 28 | 34 |    |    |     |     |     |     |     |     |     |     |     |
| GLPHQLSGLDPR     | 10                                                | 2  | 10 | 21 | 23 | 23 | 7  | 4   |     |     |     |     |     |     |     |     |
| LSPPECLNASLGGVLR | 5                                                 | 4  | 15 | 9  | 6  | 16 | 12 | 15  | 7   | 8   | 1   | 0   |     |     |     |     |
| SNSNAVSAPFNK     | 1                                                 | 54 | 5  | 4  | 19 | 10 | 3  | 2   | 2   |     |     |     |     |     |     |     |
| VTVAEYGR         | 8                                                 | 15 | 34 | 43 |    |    |    |     |     |     |     |     |     |     |     |     |
| GPVSLSK          | 6                                                 | 44 | 50 |    |    |    |    |     |     |     |     |     |     |     |     |     |

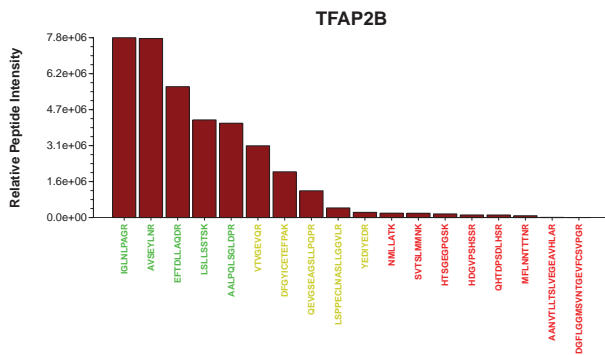

| Peptides         | Relative Contribution of Transition to Signal (%) |    |    |    |    |    |    |     |     |     |     |     |     |     |     |     |
|------------------|---------------------------------------------------|----|----|----|----|----|----|-----|-----|-----|-----|-----|-----|-----|-----|-----|
|                  | Y3                                                | Y4 | Y5 | Y6 | Y7 | Y8 | Y9 | Y10 | Y11 | Y12 | Y13 | Y14 | Y15 | Y16 | Y17 | Y18 |
| AALPQLSGLDPR     | 3                                                 | 1  | 9  | 21 | 15 | 4  | 45 | 1   |     |     |     |     |     |     |     |     |
| AWSEYLR          | 7                                                 | 20 | 7  | 66 |    |    |    |     |     |     |     |     |     |     |     |     |
| EFTDLAQR         | 9                                                 | 37 | 27 | 8  | 7  | 12 |    |     |     |     |     |     |     |     |     |     |
| IGLNLPAGR        | 1                                                 | 57 | 13 | 24 | 5  |    |    |     |     |     |     |     |     |     |     |     |
| LSLSSTSK         | 2                                                 | 6  | 30 | 29 | 34 |    |    |     |     |     |     |     |     |     |     |     |
| DFGYICETFPK      | 24                                                | 12 | 3  | 6  | 6  | 26 | 19 | 2   | 3   |     |     |     |     |     |     |     |
| LSPPECLNASLGGVLR | 4                                                 | 4  | 17 | 11 | 6  | 13 | 11 | 17  | 7   | 7   | 2   | 1   |     |     |     |     |
| QEVGSEAGSLLPQPR  | 1                                                 | 41 | 13 | 5  | 5  | 12 | 8  | 3   | 2   | 7   | 4   |     |     |     |     |     |
| VTVAEYGR         | 5                                                 | 5  | 46 | 59 |    |    |    |     |     |     |     |     |     |     |     |     |
| YEDYDR           | 5                                                 | 29 | 12 | 53 |    |    |    |     |     |     |     |     |     |     |     |     |

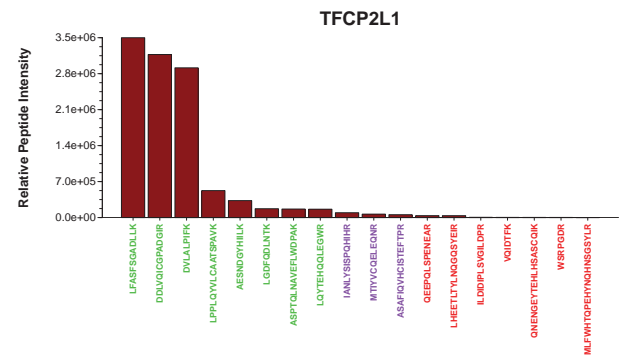

| Peptides          | Relative Contribution of Transition to Signal (%) |    |    |    |    |    |    |     |     |     |     |     |     |     |     |     |
|-------------------|---------------------------------------------------|----|----|----|----|----|----|-----|-----|-----|-----|-----|-----|-----|-----|-----|
|                   | Y3                                                | Y4 | Y5 | Y6 | Y7 | Y8 | Y9 | Y10 | Y11 | Y12 | Y13 | Y14 | Y15 | Y16 | Y17 | Y18 |
| AESNDGPHLK        | 18                                                | 7  | 20 | 4  | 20 | 10 | 5  | 16  |     |     |     |     |     |     |     |     |
| ASPTQLNAVEFLWDPAK | 24                                                | 12 | 8  | 4  | 9  | 12 | 7  | 6   | 11  | 7   |     |     |     |     |     |     |
| DDLVOICPADGR      | 11                                                | 3  | 0  | 6  | 19 | 26 | 16 | 16  | 2   | 0   |     |     |     |     |     |     |
| DYLALPIK          | 0                                                 | 19 | 14 | 30 | 37 |    |    |     |     |     |     |     |     |     |     |     |
| LFASFSGADLK       | 3                                                 | 2  | 1  | 9  | 17 | 11 | 19 | 38  |     |     |     |     |     |     |     |     |
| LGDFGLNTK         | 12                                                | 17 | 19 | 21 | 20 | 11 |    |     |     |     |     |     |     |     |     |     |
| LPPLOLYLCAATSPAVK | 0                                                 | 24 | 7  | 8  | 8  | 6  | 13 | 13  | 9   | 9   | 3   |     |     |     |     |     |
| LQYTEHQLEGWR      | 14                                                | 9  | 10 | 10 | 14 | 20 | 8  | 10  | 5   |     |     |     |     |     |     |     |
| ASAFVAVHCISTEFTPR | 5                                                 | 8  | 2  | 5  | 14 | 7  | 21 | 27  | 8   | 4   |     |     |     |     |     |     |
| IANLYSISPOHHR     | 4                                                 | 3  | 0  | 16 | 30 | 7  | 23 | 17  | 1   | 0   |     |     |     |     |     |     |
| MITYVQCELEQR      | 4                                                 | 19 | 8  | 9  | 5  | 32 | 16 | 7   | 0   |     |     |     |     |     |     |     |



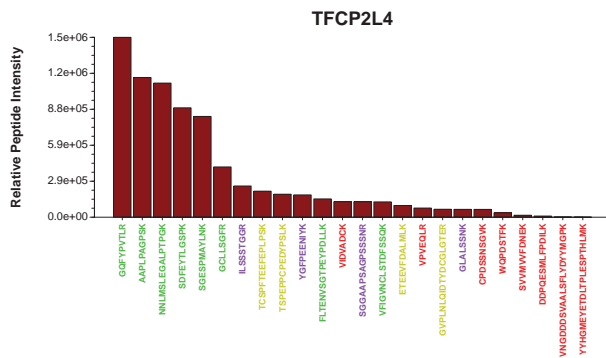

| Peptides          | Relative Contribution of Transition to Signal (%) |    |    |    |    |    |    |     |     |     |     |     |     |     |     |     |  |  |
|-------------------|---------------------------------------------------|----|----|----|----|----|----|-----|-----|-----|-----|-----|-----|-----|-----|-----|--|--|
|                   | Y3                                                | Y4 | Y5 | Y6 | Y7 | Y8 | Y9 | Y10 | Y11 | Y12 | Y13 | Y14 | Y15 | Y16 | Y17 | Y18 |  |  |
| AAPLPAQPSK        | 2                                                 | 6  | 3  | 68 | 4  | 16 |    |     |     |     |     |     |     |     |     |     |  |  |
| FLTENVSGTPEYDQLK  | 3                                                 | 1  | 22 | 7  | 0  | 31 | 3  | 8   | 19  | 3   | 2   |     |     |     |     |     |  |  |
| GCLLSQFR          | 7                                                 | 27 | 33 | 33 |    |    |    |     |     |     |     |     |     |     |     |     |  |  |
| GGFYPVTLR         | 2                                                 | 3  | 47 | 18 | 29 |    |    |     |     |     |     |     |     |     |     |     |  |  |
| NNLMSLEGALPTPK    | 27                                                | 3  | 20 | 7  | 2  | 9  | 8  | 4   | 11  | 8   | 1   |     |     |     |     |     |  |  |
| SDFEYTLGSK        | 12                                                | 8  | 6  | 17 | 31 | 15 | 10 |     |     |     |     |     |     |     |     |     |  |  |
| SGESPMAYLNK       | 11                                                | 11 | 8  | 5  | 43 | 21 | 1  |     |     |     |     |     |     |     |     |     |  |  |
| VFGWNLSTDFSSQK    | 8                                                 | 10 | 7  | 7  | 8  | 24 | 8  | 6   | 14  | 3   | 6   |     |     |     |     |     |  |  |
| ETEDYDALJK        | 12                                                | 5  | 8  | 11 | 39 | 14 | 6  | 6   |     |     |     |     |     |     |     |     |  |  |
| GVFLNLDITYDGLQTER | 1                                                 | 14 | 3  | 4  | 16 | 7  | 13 | 13  | 17  | 13  |     |     |     |     |     |     |  |  |
| TCSPTFEPEPLPSK    | 38                                                | 2  | 21 | 5  | 5  | 5  | 5  | 6   | 2   | 10  |     |     |     |     |     |     |  |  |
| TSPEPPCPEDYPLSK   | 1                                                 | 14 | 21 | 2  | 2  | 17 | 3  | 8   | 31  | 0   |     |     |     |     |     |     |  |  |
| GLALSSNK          | 6                                                 | 92 | 2  | 0  |    |    |    |     |     |     |     |     |     |     |     |     |  |  |
| ILSSSTGGR         | 2                                                 | 7  | 15 | 7  | 69 |    |    |     |     |     |     |     |     |     |     |     |  |  |
| SGGAAPAGPSSSNR    | 8                                                 | 19 | 39 | 7  | 7  | 3  | 2  | 1   | 11  | 3   | 1   |     |     |     |     |     |  |  |
| YGFPEENYK         | 2                                                 | 4  | 6  | 6  | 78 | 3  |    |     |     |     |     |     |     |     |     |     |  |  |

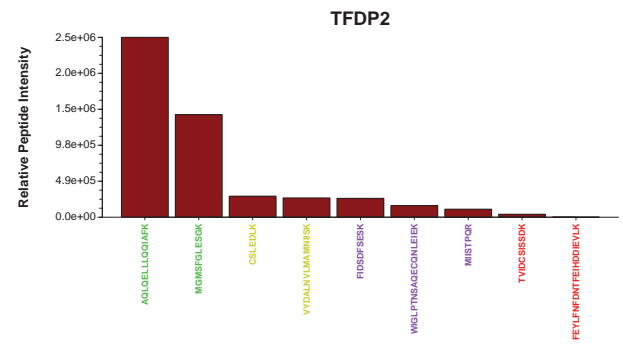

| Peptides         | Relative Contribution of Transition to Signal (%) |    |    |    |    |    |    |     |     |     |     |     |     |     |     |     |  |  |
|------------------|---------------------------------------------------|----|----|----|----|----|----|-----|-----|-----|-----|-----|-----|-----|-----|-----|--|--|
|                  | Y3                                                | Y4 | Y5 | Y6 | Y7 | Y8 | Y9 | Y10 | Y11 | Y12 | Y13 | Y14 | Y15 | Y16 | Y17 | Y18 |  |  |
| AQLGELLQOIAFK    | 16                                                | 8  | 8  | 13 | 18 | 14 | 9  | 8   | 3   | 2   |     |     |     |     |     |     |  |  |
| MGMFSQLESQK      | 12                                                | 6  | 3  | 23 | 18 | 29 | 8  |     |     |     |     |     |     |     |     |     |  |  |
| CSLEDLK          | 19                                                | 30 | 51 |    |    |    |    |     |     |     |     |     |     |     |     |     |  |  |
| YVDALNVLMMANNISK | 11                                                | 5  | 9  | 9  | 14 | 16 | 21 | 5   | 7   | 2   | 1   |     |     |     |     |     |  |  |
| FIDSDFSQK        | 1                                                 | 6  | 9  | 4  | 11 | 68 |    |     |     |     |     |     |     |     |     |     |  |  |
| MIISTPQR         | 6                                                 | 5  | 32 | 56 |    |    |    |     |     |     |     |     |     |     |     |     |  |  |
| WGLPNTSAQEQNLEIK | 22                                                | 19 | 8  | 9  | 2  | 13 | 11 | 6   | 6   | 4   |     |     |     |     |     |     |  |  |

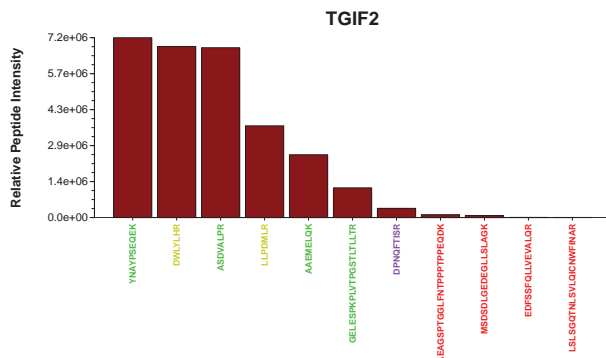

| Peptides              | Relative Contribution of Transition to Signal (%) |    |    |    |    |    |    |     |     |     |     |     |     |     |     |     |  |  |
|-----------------------|---------------------------------------------------|----|----|----|----|----|----|-----|-----|-----|-----|-----|-----|-----|-----|-----|--|--|
|                       | Y3                                                | Y4 | Y5 | Y6 | Y7 | Y8 | Y9 | Y10 | Y11 | Y12 | Y13 | Y14 | Y15 | Y16 | Y17 | Y18 |  |  |
| AAEMELQK              | 10                                                | 13 | 31 | 46 |    |    |    |     |     |     |     |     |     |     |     |     |  |  |
| ASDVALPR              | 12                                                | 52 | 15 | 22 |    |    |    |     |     |     |     |     |     |     |     |     |  |  |
| GELESPKPLVTPGSTLTLLTR | 2                                                 | 2  | 2  | 1  | 1  | 1  | 2  | 32  | 22  | 8   | 2   | 25  |     |     |     |     |  |  |
| YNAYPSEQEK            | 2                                                 | 1  | 3  | 65 | 12 | 17 |    |     |     |     |     |     |     |     |     |     |  |  |
| DWLYLHR               | 14                                                | 44 | 42 |    |    |    |    |     |     |     |     |     |     |     |     |     |  |  |
| LLPDMLR               | 14                                                | 14 | 72 |    |    |    |    |     |     |     |     |     |     |     |     |     |  |  |
| DPNQFTISR             | 9                                                 | 25 | 36 | 19 | 12 |    |    |     |     |     |     |     |     |     |     |     |  |  |

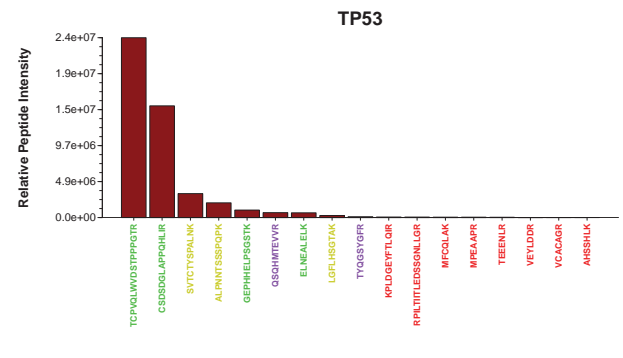

| Peptides         | Relative Contribution of Transition to Signal (%) |    |    |    |    |    |    |     |     |     |     |     |     |     |     |     |  |  |
|------------------|---------------------------------------------------|----|----|----|----|----|----|-----|-----|-----|-----|-----|-----|-----|-----|-----|--|--|
|                  | Y3                                                | Y4 | Y5 | Y6 | Y7 | Y8 | Y9 | Y10 | Y11 | Y12 | Y13 | Y14 | Y15 | Y16 | Y17 | Y18 |  |  |
| CSQSDGLAPPQHLR   | 2                                                 | 3  | 1  | 4  | 61 | 17 | 2  | 7   | 2   | 1   | 0   |     |     |     |     |     |  |  |
| ELNLELEK         | 12                                                | 15 | 31 | 11 | 31 |    |    |     |     |     |     |     |     |     |     |     |  |  |
| GEPHELPSGSK      | 27                                                | 7  | 23 | 20 | 18 | 3  | 0  | 1   | 0   |     |     |     |     |     |     |     |  |  |
| TCPVQLWVSTPPPGTR | 1                                                 | 4  | 6  | 44 | 4  | 7  | 9  | 10  | 11  | 4   | 1   |     |     |     |     |     |  |  |
| ALPNTSSSPQPK     | 1                                                 | 10 | 7  | 13 | 22 | 12 | 15 | 8   | 13  |     |     |     |     |     |     |     |  |  |
| LGFLHSGTAK       | 0                                                 | 3  | 31 | 36 | 23 | 5  |    |     |     |     |     |     |     |     |     |     |  |  |
| SVTCTYSPALNK     | 4                                                 | 1  | 19 | 18 | 17 | 21 | 9  | 10  |     |     |     |     |     |     |     |     |  |  |
| QSQHMTEVVR       | 8                                                 | 5  | 26 | 38 | 18 | 6  |    |     |     |     |     |     |     |     |     |     |  |  |
| TYGQSYGR         | 8                                                 | 5  | 5  | 33 | 47 |    |    |     |     |     |     |     |     |     |     |     |  |  |

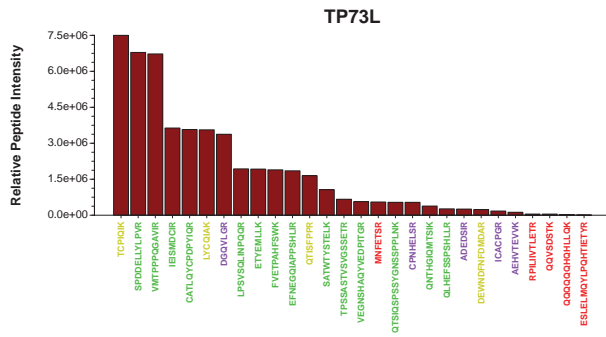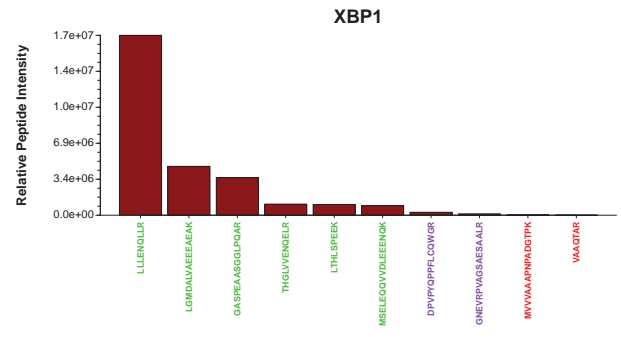

#### Relative Contribution of Transition to Signal (%)

| Peptides            | Y3 | Y4 | Y5 | Y6 | Y7 | Y8 | Y9 | Y10 | Y11 | Y12 | Y13 | Y14 | Y15 | Y16 | Y17 | Y18 |
|---------------------|----|----|----|----|----|----|----|-----|-----|-----|-----|-----|-----|-----|-----|-----|
| CATLYCQPIYQR        | 3  | 1  | 44 | 1  | 18 | 15 | 12 | 5   | 1   |     |     |     |     |     |     |     |
| EFNEGQAPPSHLR       | 1  | 2  | 1  | 3  | 51 | 24 | 10 | 2   | 5   | 1   | 0   |     |     |     |     |     |
| ETYEMLLK            | 19 | 36 | 25 | 19 |    |    |    |     |     |     |     |     |     |     |     |     |
| FVETPAHFSWK         | 5  | 8  | 7  | 3  | 39 | 15 | 23 |     |     |     |     |     |     |     |     |     |
| IBISMOCR            | 7  | 9  | 10 | 32 | 42 |    |    |     |     |     |     |     |     |     |     |     |
| LFRVSLINPOQR        | 1  | 25 | 20 | 15 | 9  | 6  | 15 | 3   | 5   |     |     |     |     |     |     |     |
| QLHFSSPSHLR         | 2  | 2  | 2  | 14 | 10 | 17 | 29 | 17  | 6   |     |     |     |     |     |     |     |
| ONTHIQMTSK          | 12 | 10 | 7  | 11 | 6  | 34 | 12 | 6   |     |     |     |     |     |     |     |     |
| QTSIQSPSSYGNSSPPLNK | 1  | 7  | 50 | 5  | 3  | 2  | 9  | 3   | 2   | 2   | 12  | 4   |     |     |     |     |
| SATWYSTELEK         | 3  | 4  | 11 | 19 | 45 | 17 | 6  |     |     |     |     |     |     |     |     |     |
| SPODELLYLR          | 19 | 17 | 24 | 19 | 11 | 4  | 3  | 3   |     |     |     |     |     |     |     |     |
| TPSASSTVSGSSETR     | 0  | 2  | 4  | 18 | 8  | 25 | 9  | 9   | 14  | 4   | 4   | 3   |     |     |     |     |
| VEGNHAQYVEDPITGR    | 2  | 1  | 67 | 4  | 4  | 6  | 6  | 5   | 5   | 1   | 0   |     |     |     |     |     |
| VMTPPGAVIR          | 1  | 1  | 5  | 3  | 21 | 31 | 31 | 9   |     |     |     |     |     |     |     |     |
| DEWDFDMAR           | 8  | 8  | 17 | 12 | 19 | 13 | 11 | 11  | 1   |     |     |     |     |     |     |     |
| LYCQIAK             | 5  | 6  | 90 |    |    |    |    |     |     |     |     |     |     |     |     |     |
| QTSIFPPR            | 37 | 12 | 34 | 18 |    |    |    |     |     |     |     |     |     |     |     |     |
| TCPIQIK             | 3  | 2  | 95 |    |    |    |    |     |     |     |     |     |     |     |     |     |
| ADEDSIR             | 23 | 28 | 48 |    |    |    |    |     |     |     |     |     |     |     |     |     |
| AEHYTEVVK           | 7  | 17 | 26 | 36 | 13 |    |    |     |     |     |     |     |     |     |     |     |
| CPNHLSR             | 19 | 28 | 34 | 20 |    |    |    |     |     |     |     |     |     |     |     |     |
| DDQVLR              | 40 | 55 | 5  |    |    |    |    |     |     |     |     |     |     |     |     |     |
| ICACPR              | 22 | 15 | 63 |    |    |    |    |     |     |     |     |     |     |     |     |     |

#### Relative Contribution of Transition to Signal (%)

| Peptides         | Y3 | Y4 | Y5 | Y6 | Y7 | Y8 | Y9 | Y10 | Y11 | Y12 | Y13 | Y14 | Y15 | Y16 | Y17 | Y18 |
|------------------|----|----|----|----|----|----|----|-----|-----|-----|-----|-----|-----|-----|-----|-----|
| GASFEAASGLPOAR   | 1  | 23 | 5  | 6  | 14 | 23 | 13 | 10  | 3   | 3   | 0   |     |     |     |     |     |
| LQMDALVAEEAEAK   | 3  | 5  | 3  | 5  | 9  | 33 | 25 | 10  | 4   | 3   | 0   |     |     |     |     |     |
| LLENQLLR         | 4  | 3  | 19 | 25 | 49 |    |    |     |     |     |     |     |     |     |     |     |
| LTHLSPEEK        | 2  | 19 | 38 | 29 | 12 |    |    |     |     |     |     |     |     |     |     |     |
| MSELEGGVVDLEENQK | 9  | 7  | 12 | 10 | 8  | 19 | 21 | 10  | 3   | 1   |     |     |     |     |     |     |
| THGLVVENQLR      | 1  | 1  | 6  | 8  | 19 | 18 | 6  | 41  |     |     |     |     |     |     |     |     |
| DPVYQPFLLQWGR    | 2  | 3  | 5  | 4  | 2  | 7  | 72 | 3   | 2   |     |     |     |     |     |     |     |
| GNEVIRPAGSAEALR  | 1  | 3  | 23 | 2  | 2  | 1  | 7  | 9   | 2   | 49  | 0   | 0   |     |     |     |     |

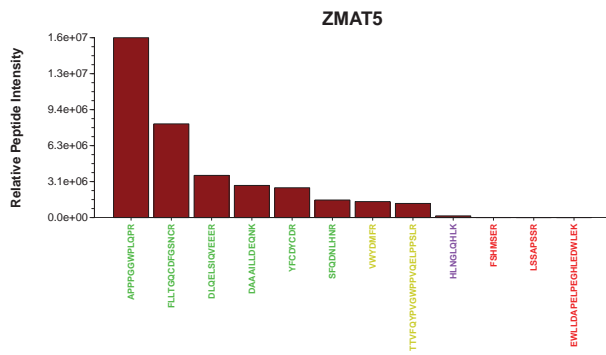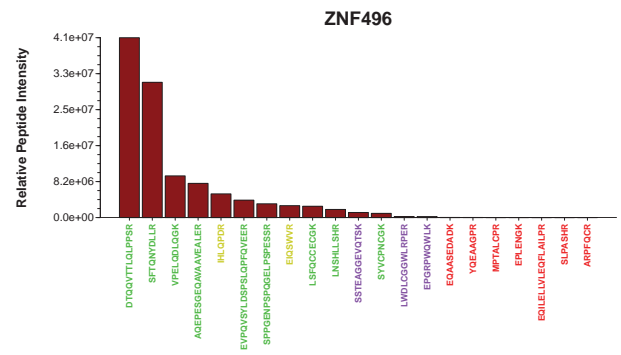

#### Relative Contribution of Transition to Signal (%)

| Peptides             | Y3 | Y4 | Y5 | Y6 | Y7 | Y8 | Y9 | Y10 | Y11 | Y12 | Y13 | Y14 | Y15 | Y16 | Y17 | Y18 |
|----------------------|----|----|----|----|----|----|----|-----|-----|-----|-----|-----|-----|-----|-----|-----|
| APPPGWFLQPR          | 1  | 1  | 14 | 2  | 2  | 7  | 26 | 48  |     |     |     |     |     |     |     |     |
| DAAAILLDEQNK         | 2  | 7  | 17 | 22 | 31 | 14 | 6  | 2   |     |     |     |     |     |     |     |     |
| DLOELSIQVEEER        | 6  | 10 | 9  | 14 | 11 | 30 | 12 | 8   | 1   |     |     |     |     |     |     |     |
| FLITGDCFSNCR         | 4  | 5  | 17 | 15 | 8  | 14 | 4  | 18  | 12  | 3   |     |     |     |     |     |     |
| SFGDMLNHR            | 23 | 10 | 19 | 26 | 22 |    |    |     |     |     |     |     |     |     |     |     |
| YFCDYGR              | 6  | 21 | 29 | 52 |    |    |    |     |     |     |     |     |     |     |     |     |
| TTVFGYVQWPPVQELPPLSR | 4  | 3  | 40 | 5  | 1  | 2  | 0  | 2   | 37  | 1   | 2   |     |     |     |     |     |
| VWYDMFR              | 12 | 12 | 76 |    |    |    |    |     |     |     |     |     |     |     |     |     |
| HLNGLDQLK            | 20 | 3  | 2  | 16 | 59 |    |    |     |     |     |     |     |     |     |     |     |

#### Relative Contribution of Transition to Signal (%)

| Peptides            | Y3 | Y4 | Y5 | Y6 | Y7 | Y8 | Y9 | Y10 | Y11 | Y12 | Y13 | Y14 | Y15 | Y16 | Y17 | Y18 |
|---------------------|----|----|----|----|----|----|----|-----|-----|-----|-----|-----|-----|-----|-----|-----|
| AGEPESGGAWEALER     | 3  | 9  | 12 | 8  | 11 | 22 | 10 | 9   | 6   | 2   | 4   | 3   |     |     |     |     |
| DTQGVTLQLPSPR       | 2  | 57 | 7  | 6  | 4  | 4  | 14 | 5   | 2   | 0   |     |     |     |     |     |     |
| EVPOVSYLDSPLQFQVEER | 9  | 8  | 5  | 1  | 40 | 8  | 2  | 2   | 17  | 8   |     |     |     |     |     |     |
| LNHLRHR             | 18 | 35 | 27 | 8  | 12 |    |    |     |     |     |     |     |     |     |     |     |
| LSPOCEGK            | 14 | 6  | 15 | 40 | 12 | 12 |    |     |     |     |     |     |     |     |     |     |
| SFTQNYDLR           | 12 | 14 | 14 | 30 | 19 | 19 |    |     |     |     |     |     |     |     |     |     |
| SPPGENPSQGLPSPSSR   | 6  | 2  | 12 | 3  | 33 | 9  | 1  | 6   | 1   | 14  | 2   | 11  |     |     |     |     |
| SYVCPNGK            | 7  | 4  | 45 | 23 | 20 |    |    |     |     |     |     |     |     |     |     |     |
| VPELDLQK            | 7  | 16 | 13 | 13 | 28 | 23 |    |     |     |     |     |     |     |     |     |     |
| EIQSWVR             | 14 | 52 | 34 |    |    |    |    |     |     |     |     |     |     |     |     |     |
| IHLQPR              | 13 | 16 | 71 |    |    |    |    |     |     |     |     |     |     |     |     |     |
| EPGRPWVWLK          | 40 | 9  | 3  | 39 | 2  | 8  |    |     |     |     |     |     |     |     |     |     |
| LNLDLQGWLRPER       | 89 | 7  | 5  | 2  | 2  | 7  | 3  | 3   | 1   |     |     |     |     |     |     |     |
| SSTEAGGEVQTSK       | 10 | 6  | 5  | 2  | 9  | 37 | 23 | 6   | 2   |     |     |     |     |     |     |     |

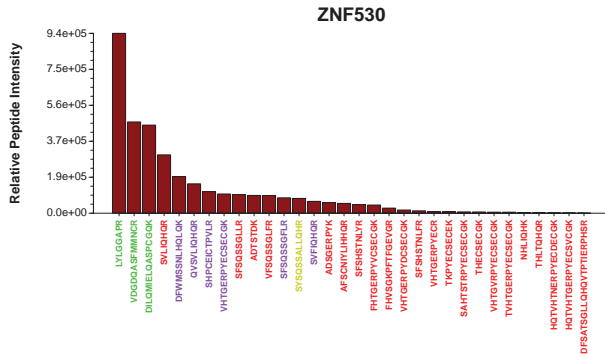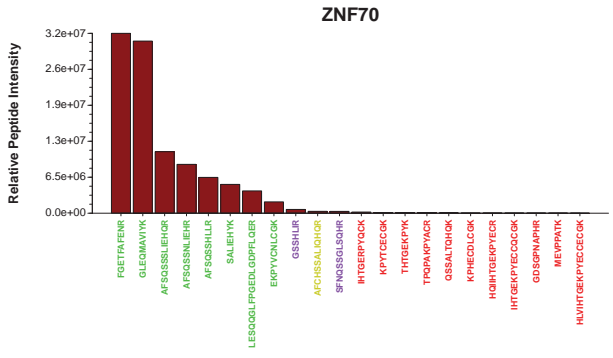

| Peptides       | Relative Contribution of Transition to Signal (%) |    |    |    |    |    |    |     |     |     |     |     |     |     |     |     |
|----------------|---------------------------------------------------|----|----|----|----|----|----|-----|-----|-----|-----|-----|-----|-----|-----|-----|
|                | Y3                                                | Y4 | Y5 | Y6 | Y7 | Y8 | Y9 | Y10 | Y11 | Y12 | Y13 | Y14 | Y15 | Y16 | Y17 | Y18 |
| DILQMELOASPCGK | 5                                                 | 2  | 28 | 20 | 14 | 7  | 8  | 9   | 5   | 2   | 0   |     |     |     |     |     |
| LYLGGAPR       | 0                                                 | 5  | 37 | 57 |    |    |    |     |     |     |     |     |     |     |     |     |
| VDGDQASFMMNCR  | 10                                                | 15 | 17 | 12 | 27 | 14 | 3  | 1   | 2   |     |     |     |     |     |     |     |
| SYSQSSALLQHR   | 9                                                 | 17 | 11 | 13 | 14 | 22 | 5  | 8   |     |     |     |     |     |     |     |     |
| DFWMSNLHQLK    | 8                                                 | 13 | 17 | 4  | 6  | 8  | 26 | 15  | 2   |     |     |     |     |     |     |     |
| QVSVLIQHQR     | 10                                                | 20 | 19 | 19 | 6  | 27 |    |     |     |     |     |     |     |     |     |     |
| SFQSSGFLR      | 2                                                 | 10 | 10 | 35 | 6  | 37 |    |     |     |     |     |     |     |     |     |     |
| SHPCDICTPLR    | 7                                                 | 4  | 5  | 10 | 14 | 7  | 6  | 47  |     |     |     |     |     |     |     |     |
| SVFIQHR        | 10                                                | 35 | 25 | 29 |    |    |    |     |     |     |     |     |     |     |     |     |
| VHTGERPYECEGK  | 1                                                 | 8  | 4  | 5  | 3  | 0  | 14 | 65  | 0   | 0   |     |     |     |     |     |     |

| Peptides             | Relative Contribution of Transition to Signal (%) |    |    |    |    |    |    |     |     |     |     |     |     |     |     |     |
|----------------------|---------------------------------------------------|----|----|----|----|----|----|-----|-----|-----|-----|-----|-----|-----|-----|-----|
|                      | Y3                                                | Y4 | Y5 | Y6 | Y7 | Y8 | Y9 | Y10 | Y11 | Y12 | Y13 | Y14 | Y15 | Y16 | Y17 | Y18 |
| AFSSSLLR             | 4                                                 | 5  | 6  | 15 | 5  | 15 |    |     |     |     |     |     |     |     |     |     |
| AFSSSNIIEHR          | 19                                                | 14 | 6  | 7  | 14 | 25 | 4  | 10  |     |     |     |     |     |     |     |     |
| AFSSSLEIQR           | 15                                                | 18 | 12 | 7  | 11 | 13 | 18 | 2   | 5   |     |     |     |     |     |     |     |
| EKPYVNLCKG           | 8                                                 | 3  | 5  | 16 | 13 | 7  | 49 |     |     |     |     |     |     |     |     |     |
| FOETAFEMR            | 8                                                 | 20 | 30 | 21 | 17 | 4  |    |     |     |     |     |     |     |     |     |     |
| GLEGMAYIK            | 22                                                | 12 | 19 | 20 | 14 | 13 |    |     |     |     |     |     |     |     |     |     |
| LESQGLFPGEDLGDFFLQHR | 8                                                 | 5  | 1  | 49 | 2  | 5  | 5  | 3   | 1   | 2   | 21  |     |     |     |     |     |
| SALIEHYK             | 10                                                | 24 | 36 | 29 |    |    |    |     |     |     |     |     |     |     |     |     |
| AFCHSALDHQR          | 10                                                | 16 | 9  | 9  | 7  | 14 | 26 | 8   | 1   |     |     |     |     |     |     |     |
| GSSHILR              | 56                                                | 25 | 19 |    |    |    |    |     |     |     |     |     |     |     |     |     |
| SFNSGSLQHR           | 7                                                 | 17 | 5  | 16 | 19 | 26 | 7  | 4   |     |     |     |     |     |     |     |     |

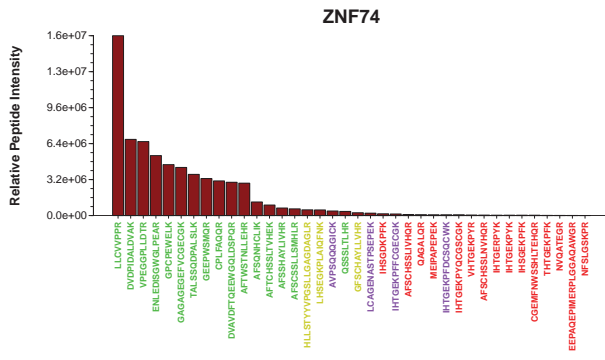

## **SUPPLEMENTARY DATA LEGENDS**

**Supplementary Data 2. Comparison of our empirical rankings with peptide rank predictions from the ESPPredictor algorithm**

**ATOH7**  
ESPPredictor vs. Empirical SRM intensities

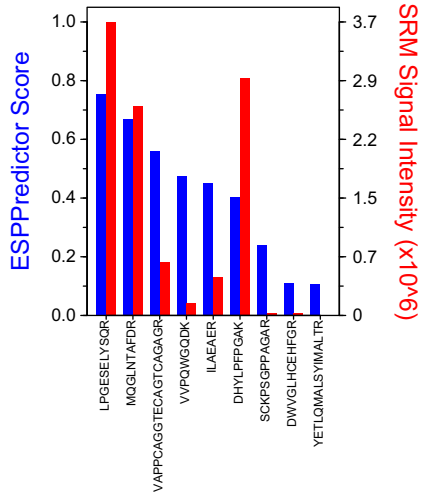

**ESPPredictor Rank vs. Empirical SRM Intensity Rank (Spearman=0.82)**

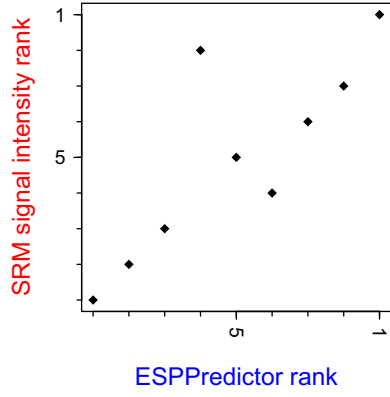

**BHLHB2**  
ESPPredictor vs. Empirical SRM intensities

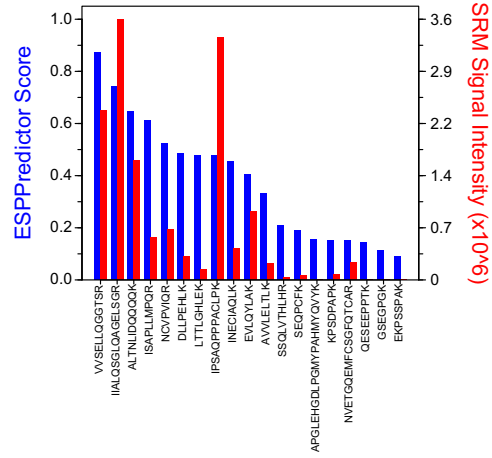

**ESPPredictor Rank vs. Empirical SRM Intensity Rank (Spearman=0.83)**

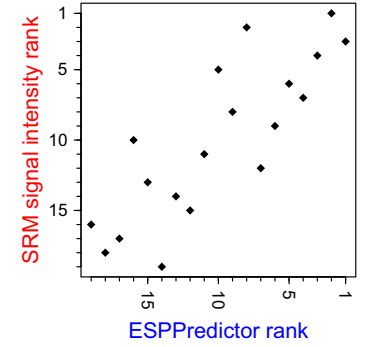

**CCDC16**  
ESPPredictor vs. Empirical SRM intensities

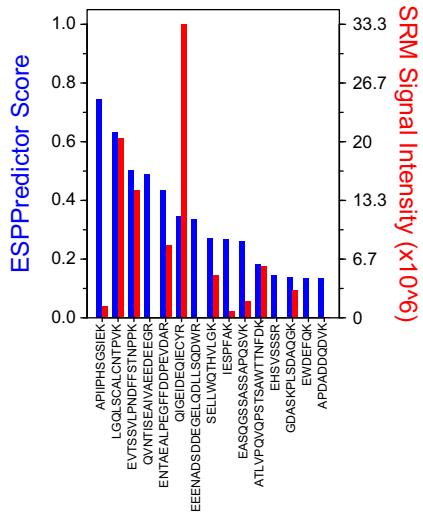

**ESPPredictor Rank vs. Empirical SRM Intensity Rank (Spearman=0.47)**

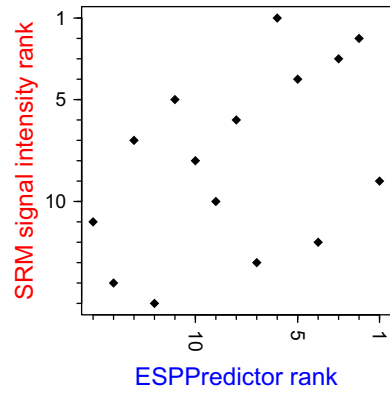

**CLOCK**  
ESPPredictor vs. Empirical SRM intensities

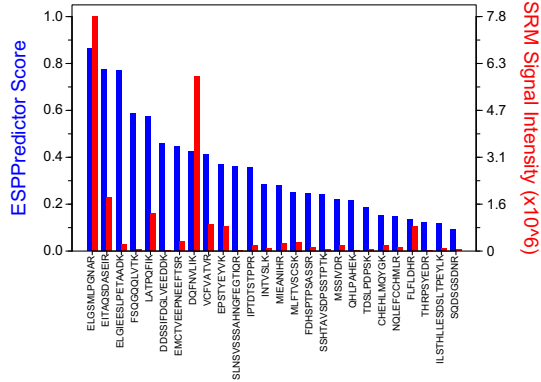

**ESPPredictor Rank vs. Empirical SRM Intensity Rank (Spearman=0.49)**

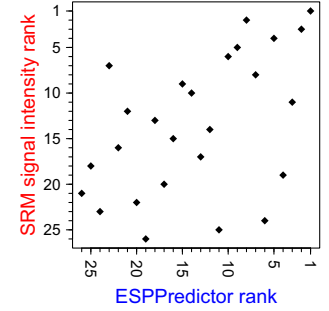

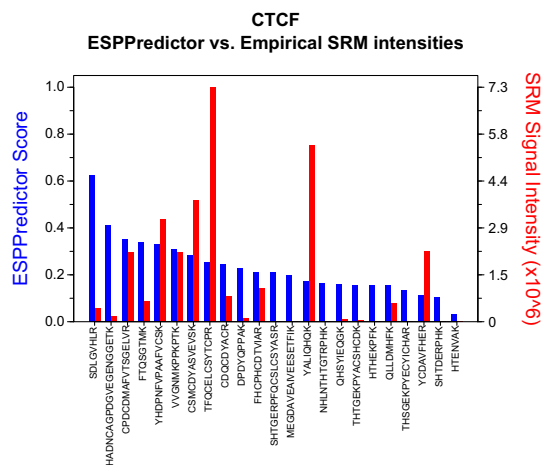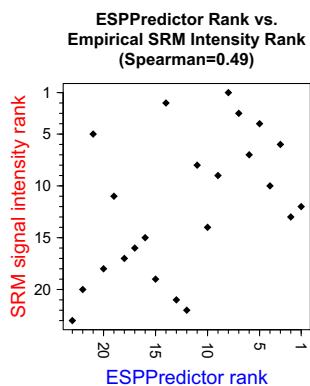

### E2F5

#### ESPPredictor vs. Empirical SRM intensities

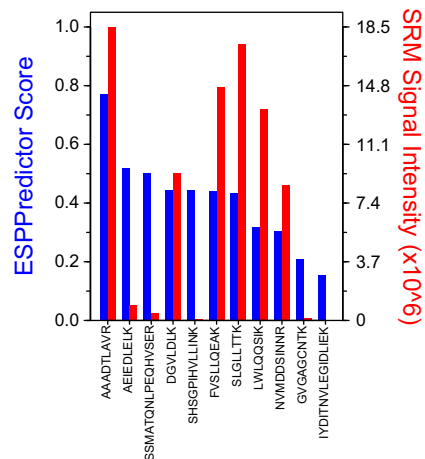

#### ESPPredictor Rank vs. Empirical SRM Intensity Rank (Spearman=0.38)

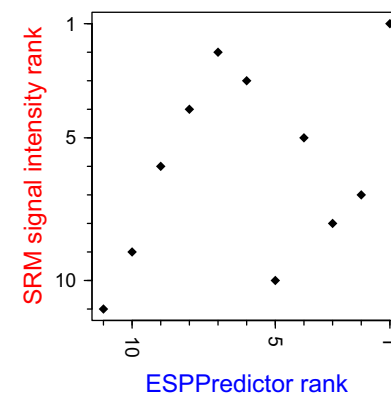

### ERG

#### ESPPredictor vs. Empirical SRM intensities

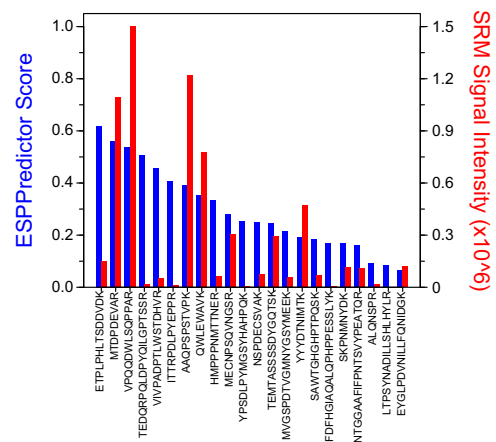

#### ESPPredictor Rank vs. Empirical SRM Intensity Rank (Spearman=0.34)

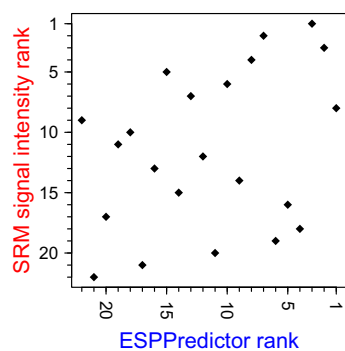

### ETS2

#### ESPPredictor vs. Empirical SRM intensities

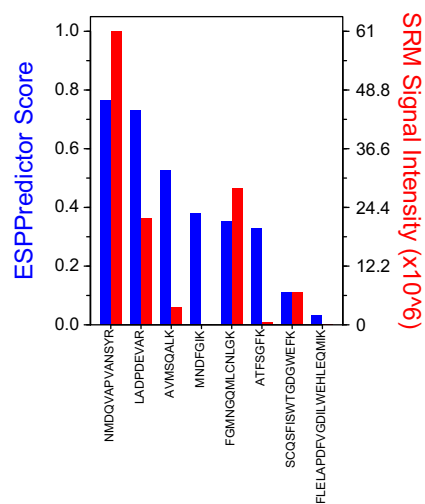

#### ESPPredictor Rank vs. Empirical SRM Intensity Rank (Spearman=0.62)

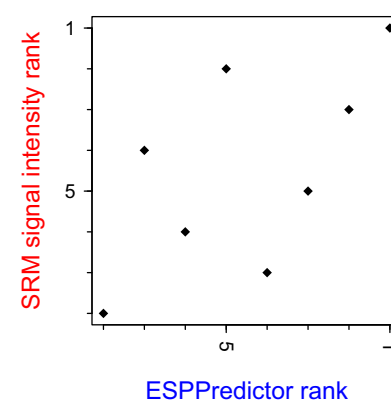

**EWSR1**  
ESPPredictor vs. Empirical SRM intensities

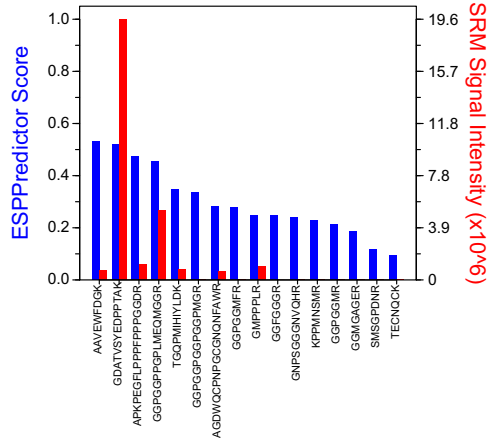

**ESPPredictor Rank vs. Empirical SRM Intensity Rank (Spearman=0.82)**

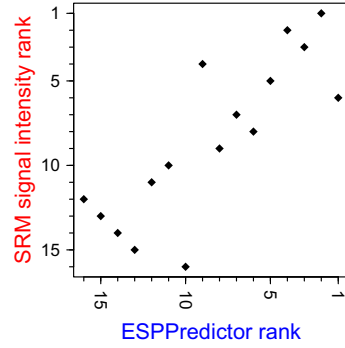

**EZH2**  
ESPPredictor vs. Empirical SRM intensities

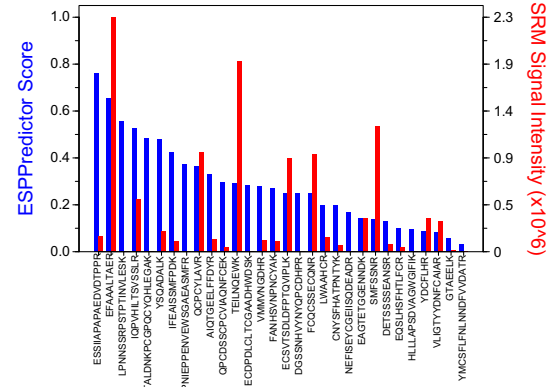

**ESPPredictor Rank vs. Empirical SRM Intensity Rank (Spearman=0.099)**

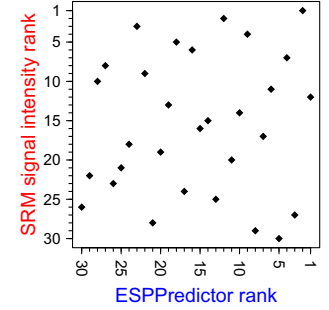

**FOSB**  
ESPPredictor vs. Empirical SRM intensities

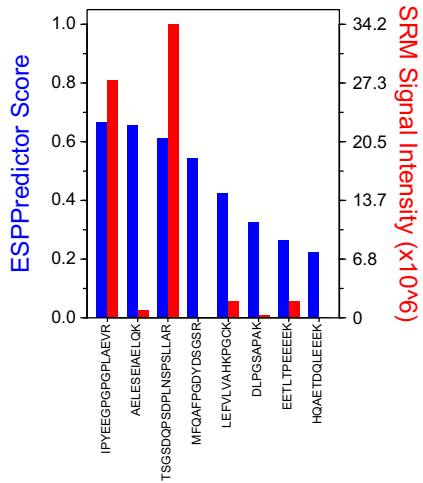

**ESPPredictor Rank vs. Empirical SRM Intensity Rank (Spearman=0.57)**

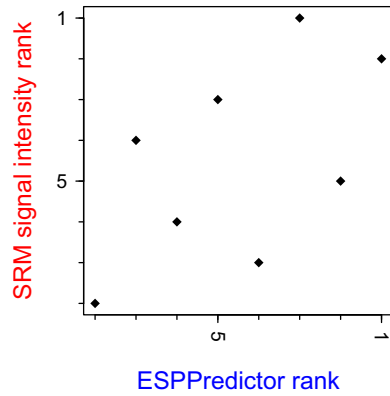

**FOSL2**  
ESPPredictor vs. Empirical SRM intensities

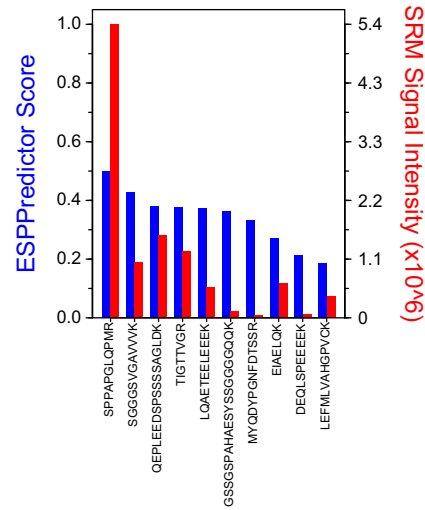

**ESPPredictor Rank vs. Empirical SRM Intensity Rank (Spearman=0.77)**

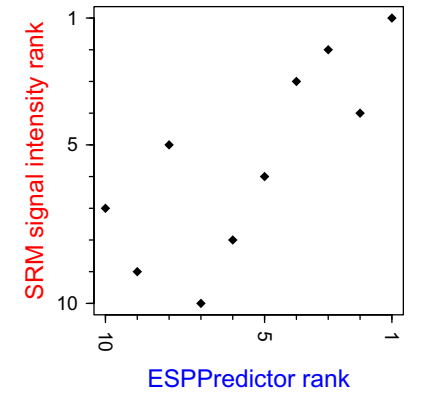

**FOXN1**  
ESPPredictor vs. Empirical SRM intensities

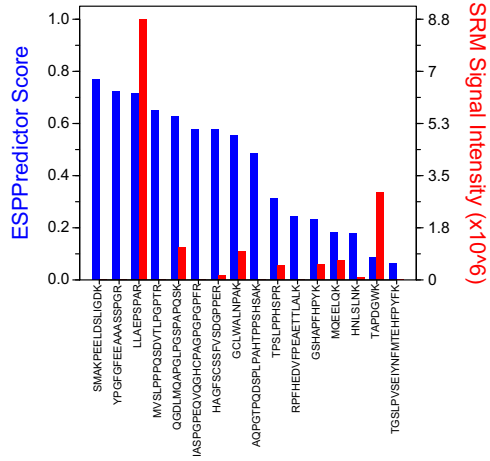

**ESPPredictor Rank vs. Empirical SRM Intensity Rank**  
(Spearman=-0.053)

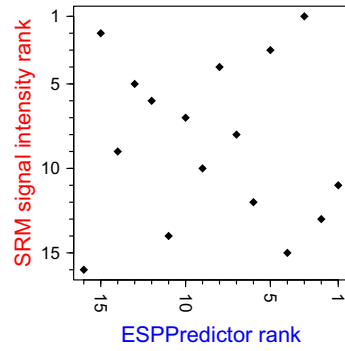

**FOXR2**  
ESPPredictor vs. Empirical SRM intensities

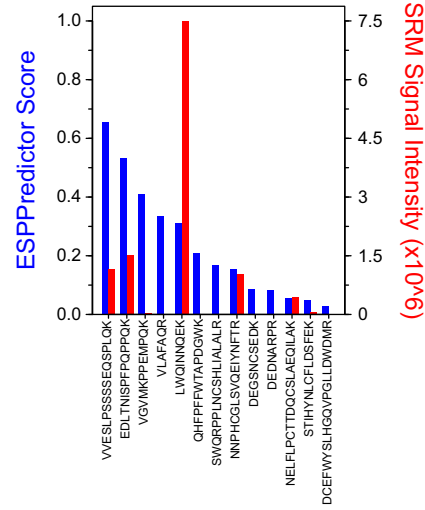

**ESPPredictor Rank vs. Empirical SRM Intensity Rank**  
(Spearman=0.48)

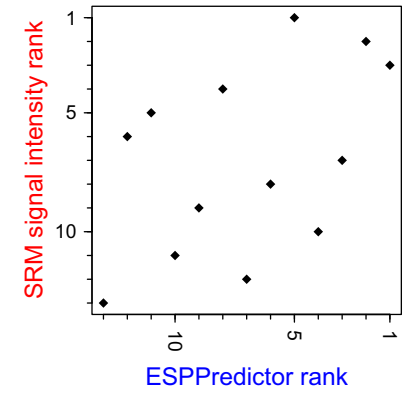

**GATA2**  
ESPPredictor vs. Empirical SRM intensities

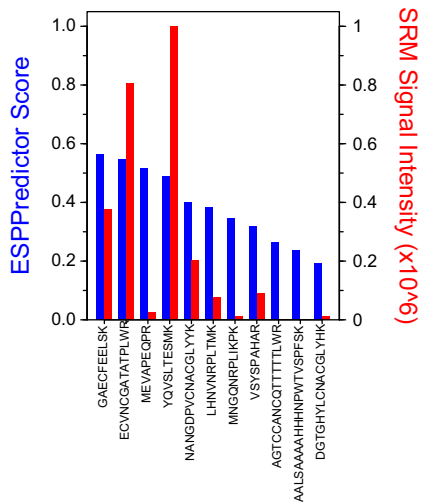

**ESPPredictor Rank vs. Empirical SRM Intensity Rank**  
(Spearman=0.79)

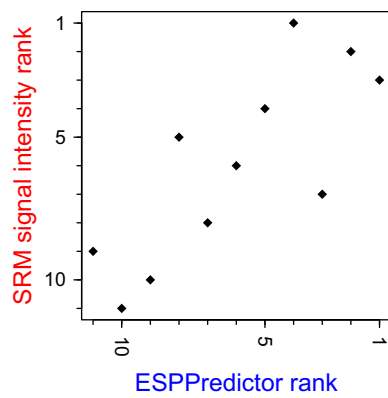

**GATA3**  
ESPPredictor vs. Empirical SRM intensities

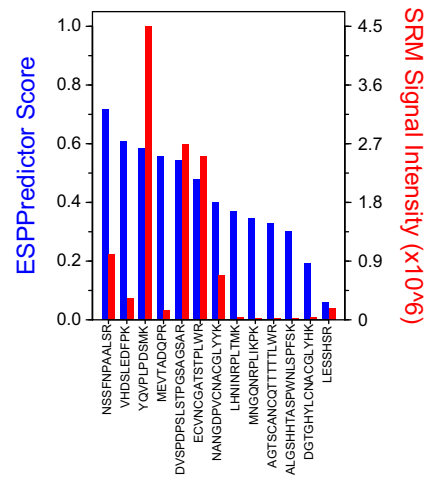

**ESPPredictor Rank vs. Empirical SRM Intensity Rank**  
(Spearman=0.64)

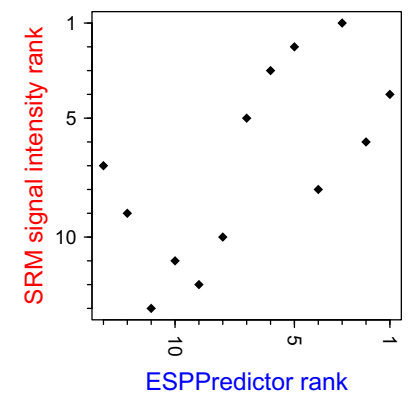



**GF11**  
ESPPredictor vs. Empirical SRM intensities

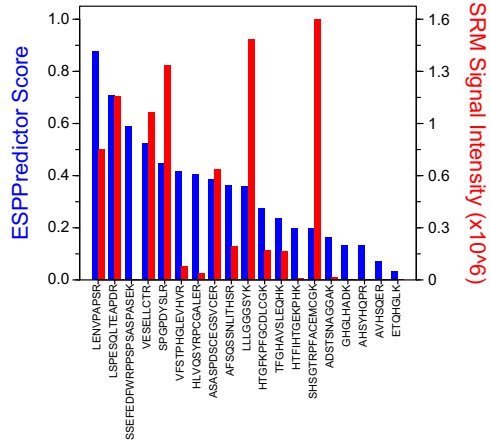

**ESPPredictor Rank vs. Empirical SRM Intensity Rank (Spearman=0.53)**

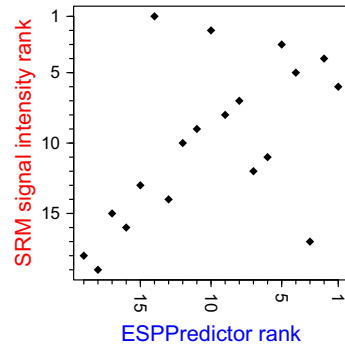

**GMEB1**  
ESPPredictor vs. Empirical SRM intensities

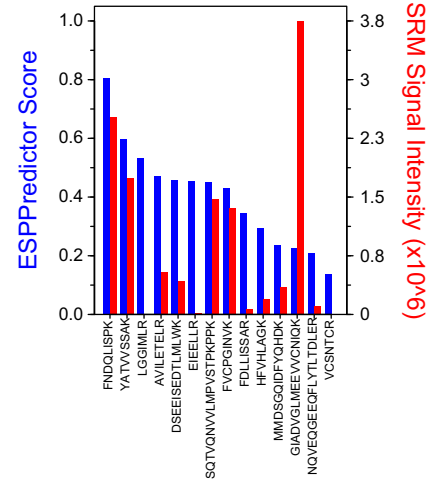

**ESPPredictor Rank vs. Empirical SRM Intensity Rank (Spearman=0.32)**

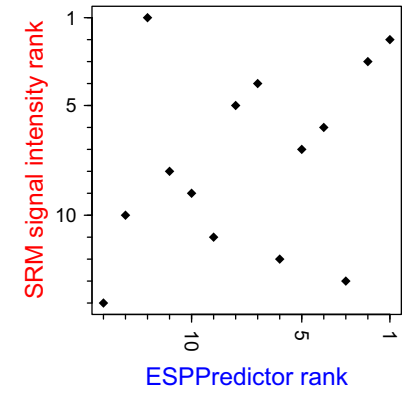

**GMEB2**  
ESPPredictor vs. Empirical SRM intensities

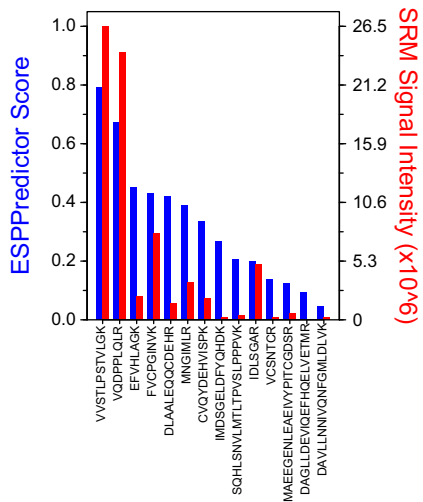

**ESPPredictor Rank vs. Empirical SRM Intensity Rank (Spearman=0.78)**

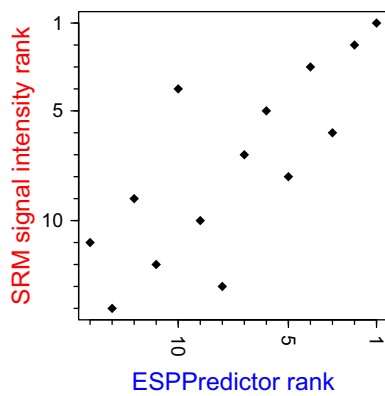

**GTF2H4**  
ESPPredictor vs. Empirical SRM intensities

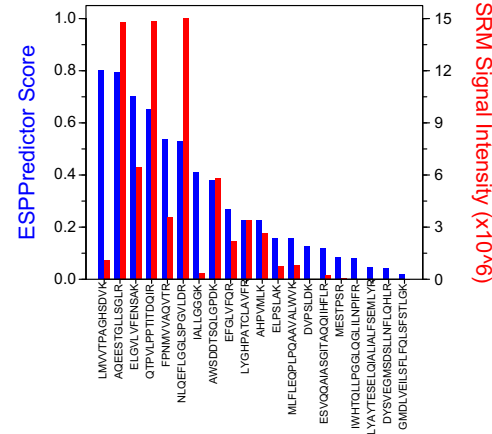

**ESPPredictor Rank vs. Empirical SRM Intensity Rank (Spearman=0.85)**

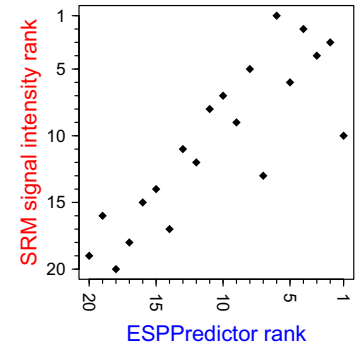

**HOXA10**  
ESPPredictor vs. Empirical SRM intensities

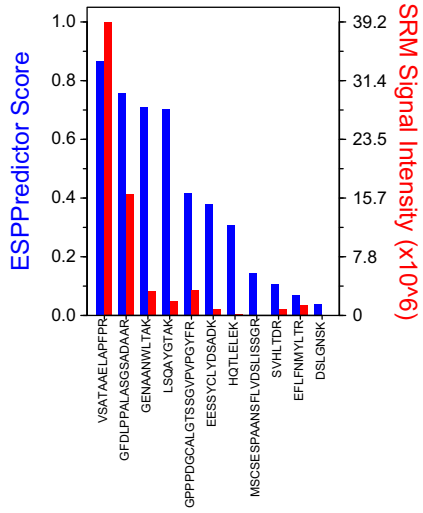

**ESPPredictor Rank vs. Empirical SRM Intensity Rank**  
(Spearman=0.8)

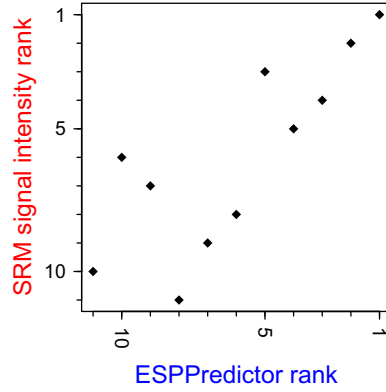

**HOXA5**  
ESPPredictor vs. Empirical SRM intensities

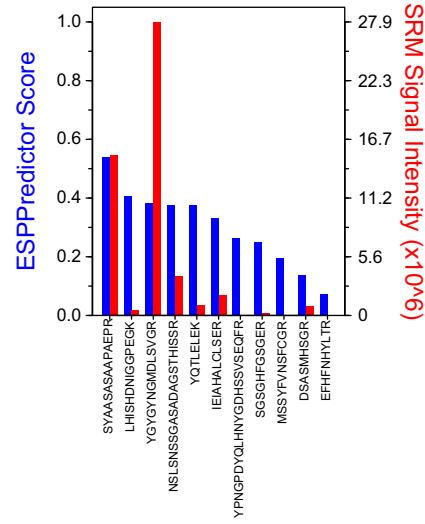

**ESPPredictor Rank vs. Empirical SRM Intensity Rank**  
(Spearman=0.69)

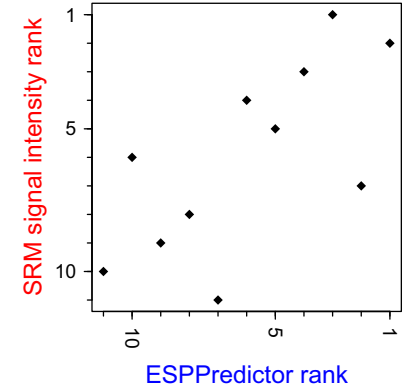

**HSF4**  
ESPPredictor vs. Empirical SRM intensities

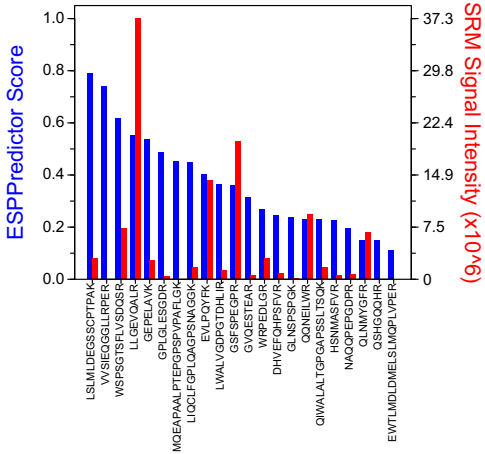

**ESPPredictor Rank vs. Empirical SRM Intensity Rank**  
(Spearman=0.27)

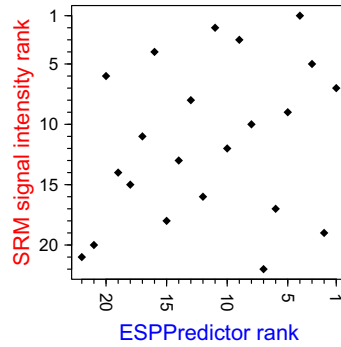

**HSFY2**  
ESPPredictor vs. Empirical SRM intensities

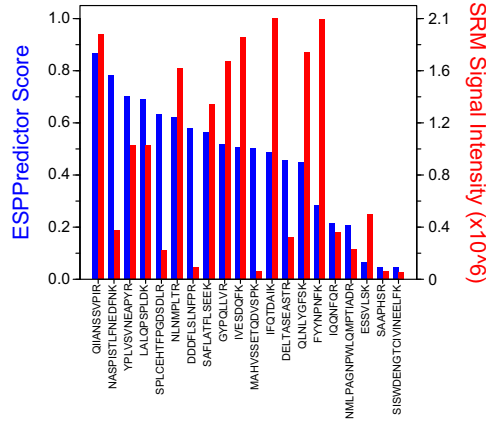

**ESPPredictor Rank vs. Empirical SRM Intensity Rank**  
(Spearman=0.29)

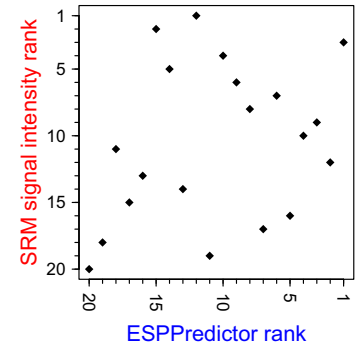



**LEF1**  
ESPPredictor vs. Empirical SRM intensities

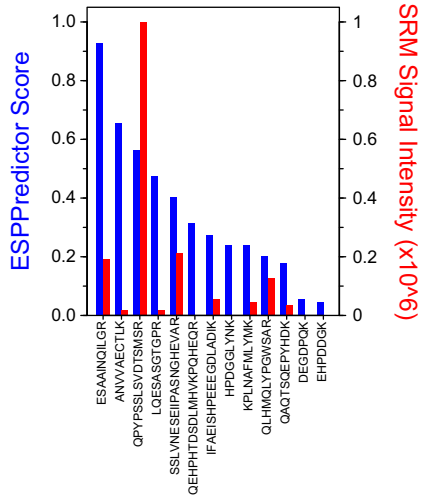

**ESPPredictor Rank vs. Empirical SRM Intensity Rank (Spearman=0.45)**

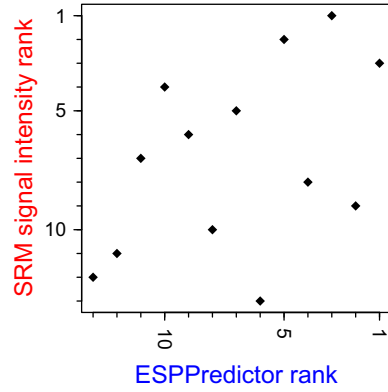

**LHX4**  
ESPPredictor vs. Empirical SRM intensities

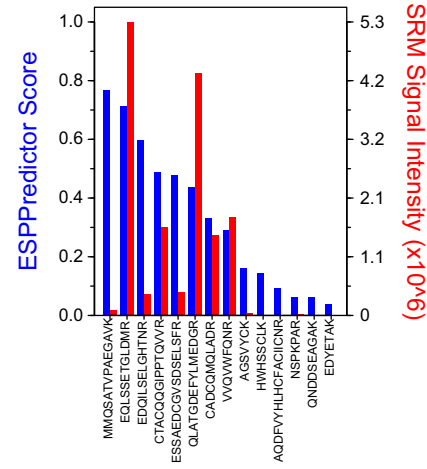

**ESPPredictor Rank vs. Empirical SRM Intensity Rank (Spearman=0.71)**

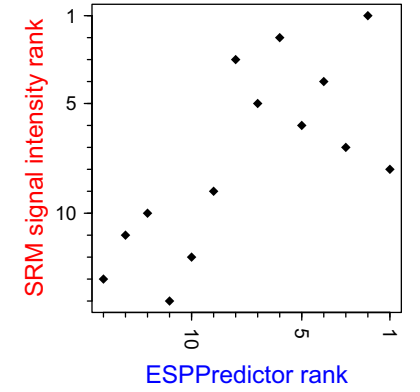

**LIN28**  
ESPPredictor vs. Empirical SRM intensities

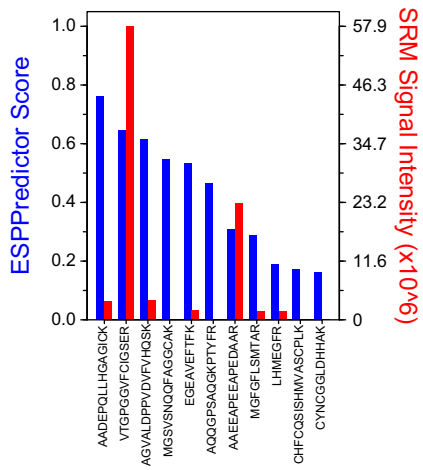

**ESPPredictor Rank vs. Empirical SRM Intensity Rank (Spearman=0.6)**

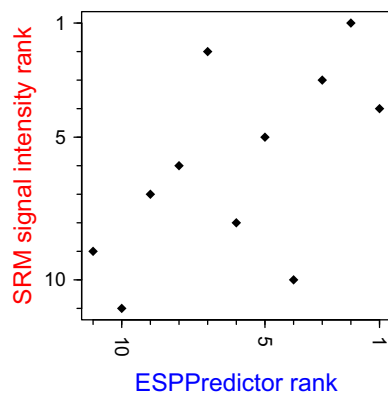

**MAD**  
ESPPredictor vs. Empirical SRM intensities

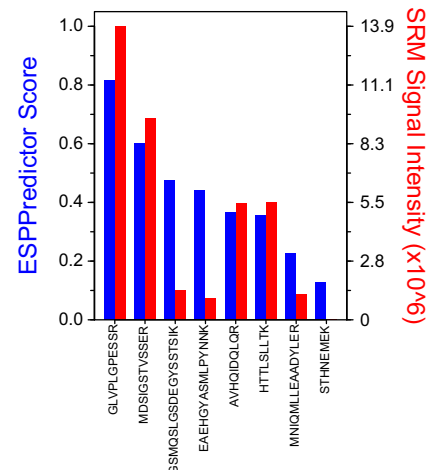

**ESPPredictor Rank vs. Empirical SRM Intensity Rank (Spearman=0.71)**

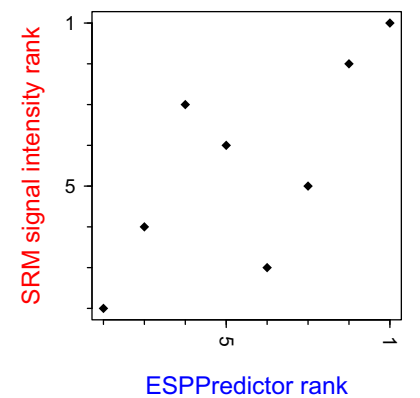

**MAX**  
ESPPredictor vs. Empirical SRM intensities

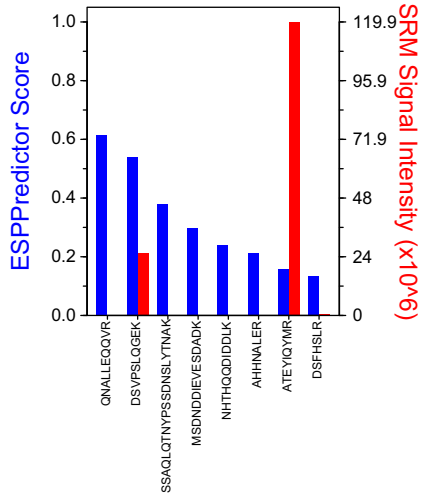

ESPPredictor Rank vs. Empirical SRM Intensity Rank (Spearman=-0.45)

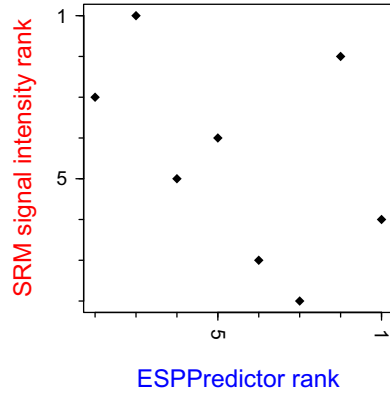

**MEF2A**  
ESPPredictor vs. Empirical SRM intensities

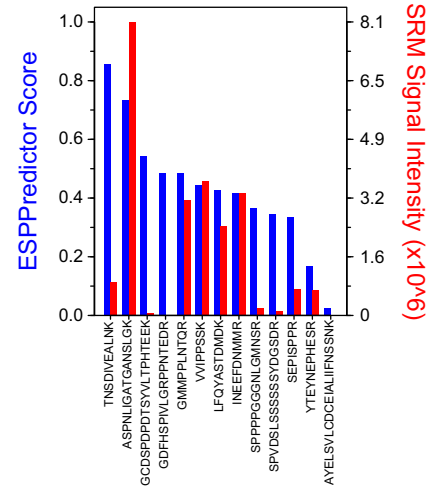

ESPPredictor Rank vs. Empirical SRM Intensity Rank (Spearman=0.36)

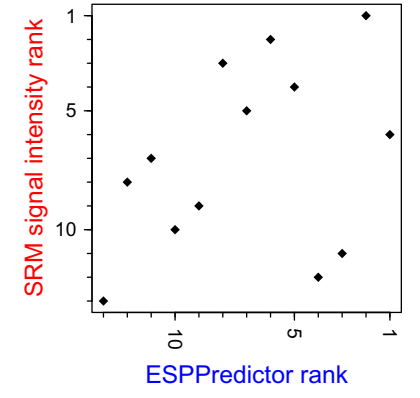

**MEF2C**  
ESPPredictor vs. Empirical SRM intensities

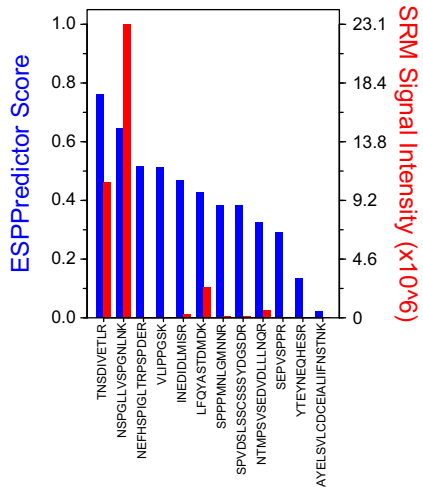

ESPPredictor Rank vs. Empirical SRM Intensity Rank (Spearman=0.57)

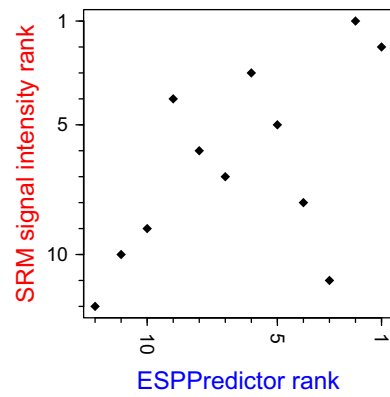

**MYB**  
ESPPredictor vs. Empirical SRM intensities

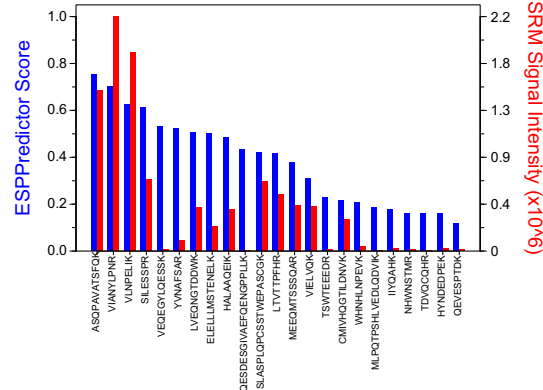

ESPPredictor Rank vs. Empirical SRM Intensity Rank (Spearman=0.66)

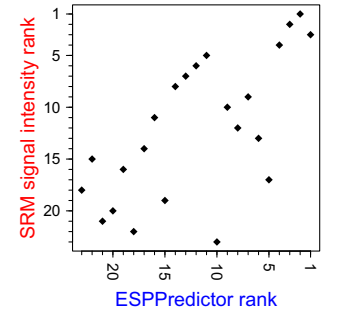

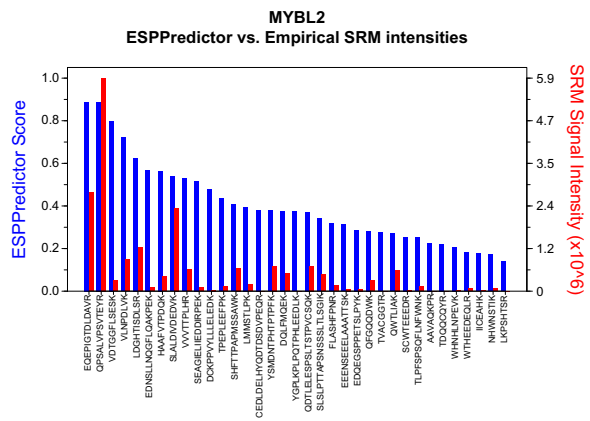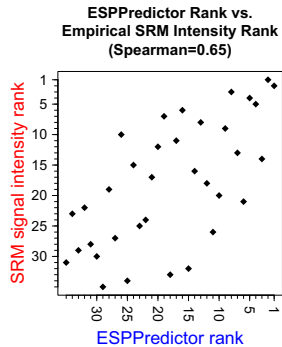

### MYC

#### ESPPredictor vs. Empirical SRM intensities

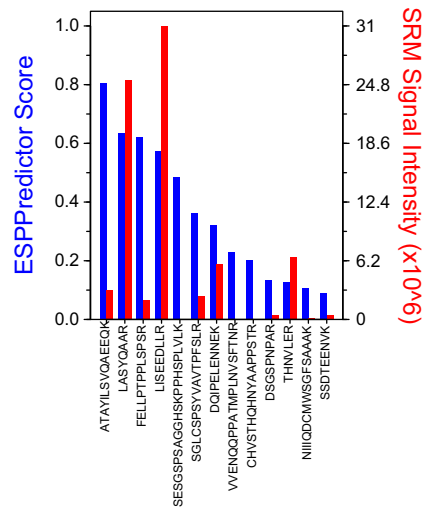

#### ESPPredictor Rank vs. Empirical SRM Intensity Rank (Spearman=0.39)

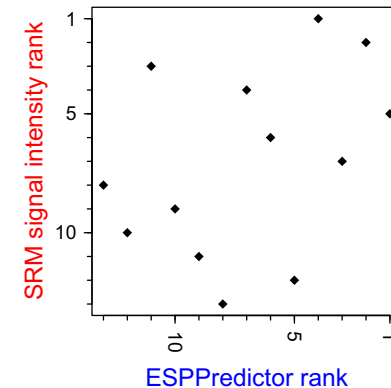

### MYF6

#### ESPPredictor vs. Empirical SRM intensities

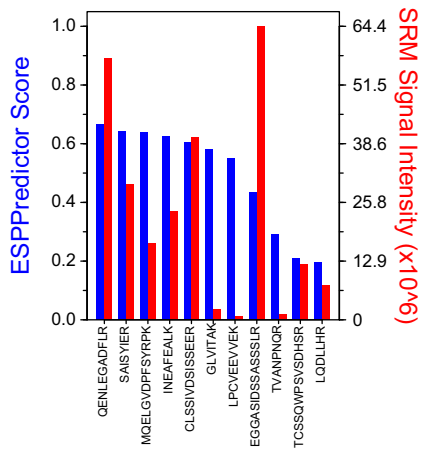

#### ESPPredictor Rank vs. Empirical SRM Intensity Rank (Spearman=0.49)

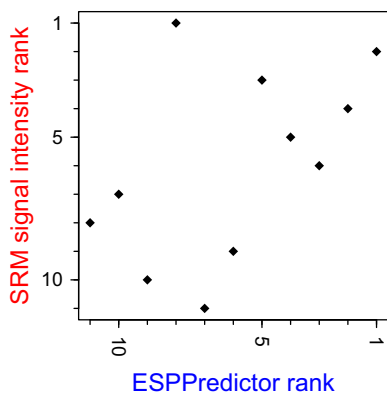

### NFE2

#### ESPPredictor vs. Empirical SRM intensities

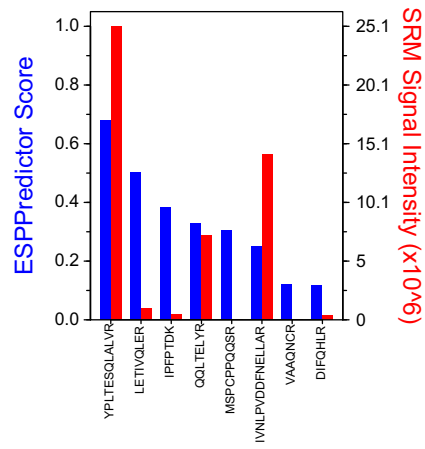

#### ESPPredictor Rank vs. Empirical SRM Intensity Rank (Spearman=0.6)

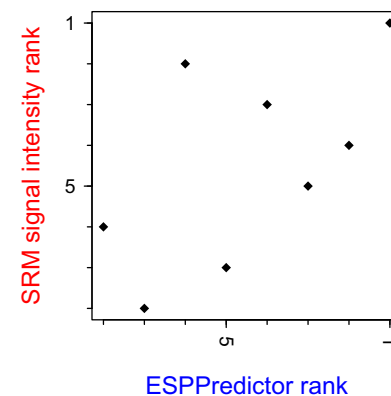

**NFIA**  
ESPPredictor vs. Empirical SRM intensities

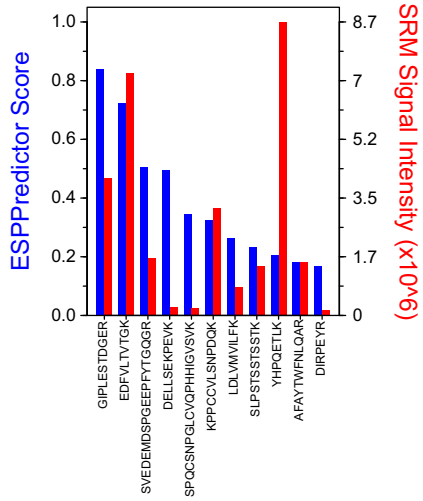

**ESPPredictor Rank vs. Empirical SRM Intensity Rank (Spearman=0.35)**

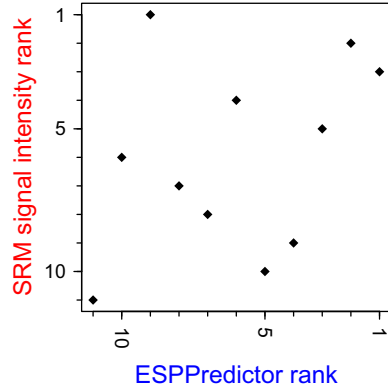

**NFKB1**  
ESPPredictor vs. Empirical SRM intensities

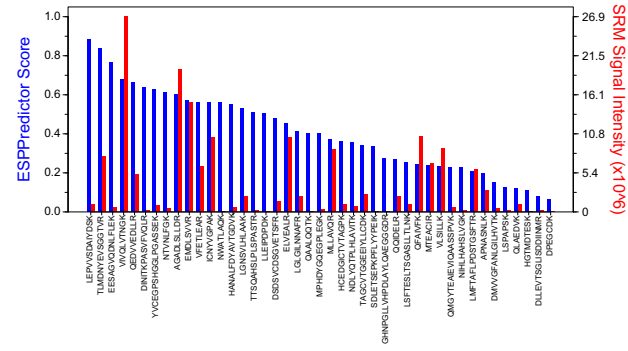

**ESPPredictor Rank vs. Empirical SRM Intensity Rank (Spearman=0.28)**

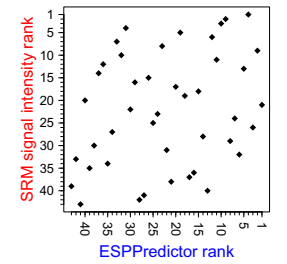

**NR113**  
ESPPredictor vs. Empirical SRM intensities

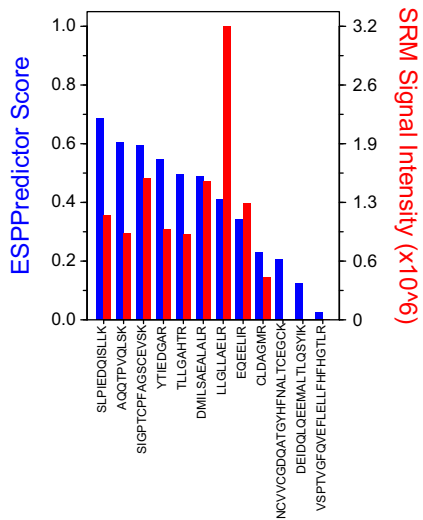

**ESPPredictor Rank vs. Empirical SRM Intensity Rank (Spearman=0.59)**

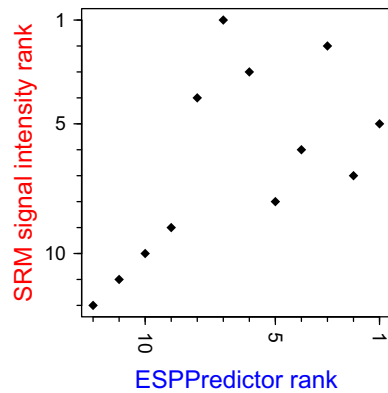

**NR2E1**  
ESPPredictor vs. Empirical SRM intensities

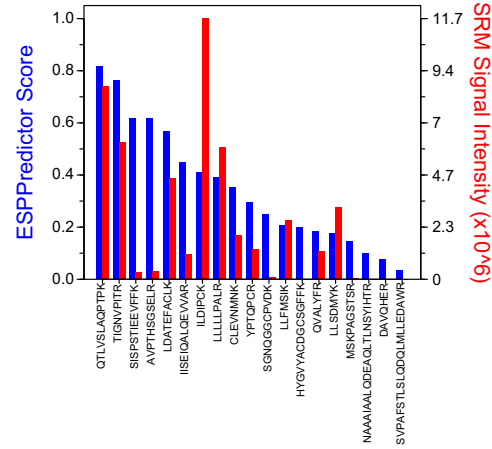

**ESPPredictor Rank vs. Empirical SRM Intensity Rank (Spearman=0.65)**

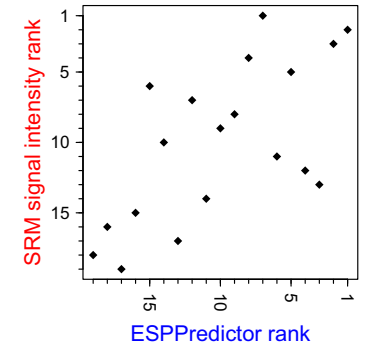

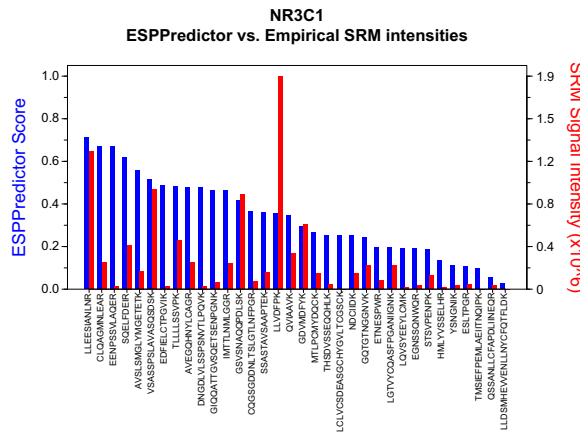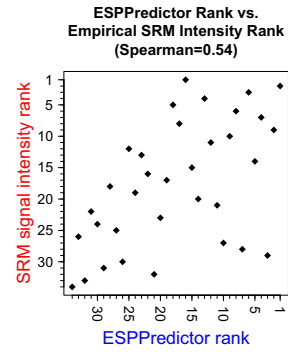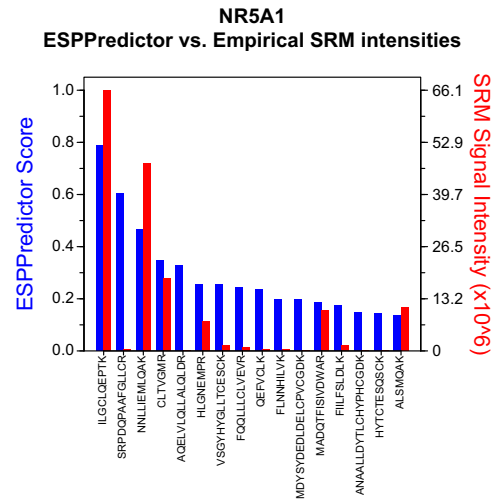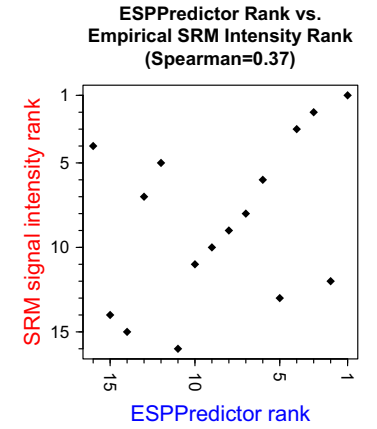

**OLIG1**  
ESPPredictor vs. Empirical SRM intensities

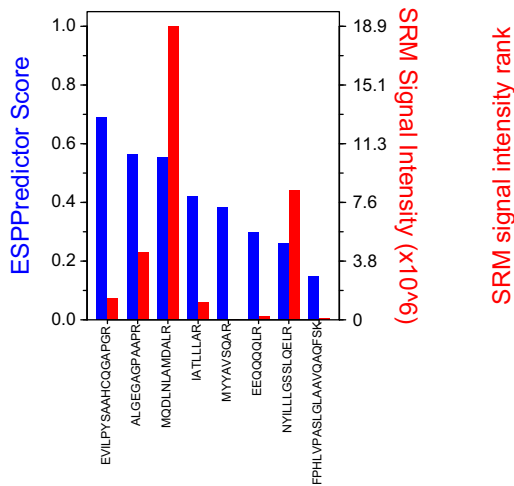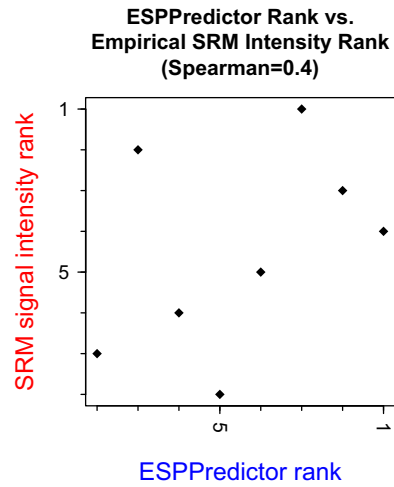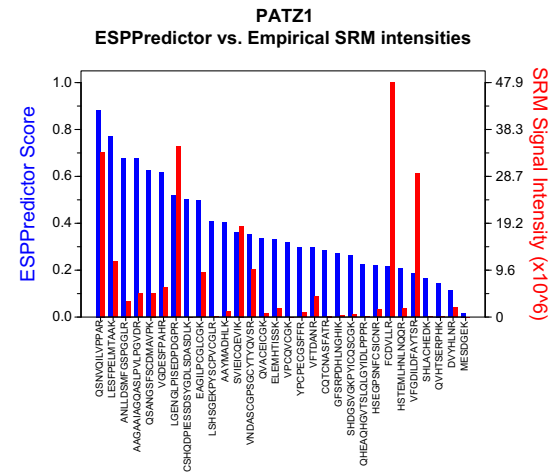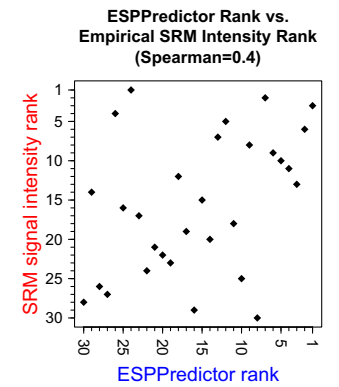



**PITX3**  
ESPPredictor vs. Empirical SRM intensities

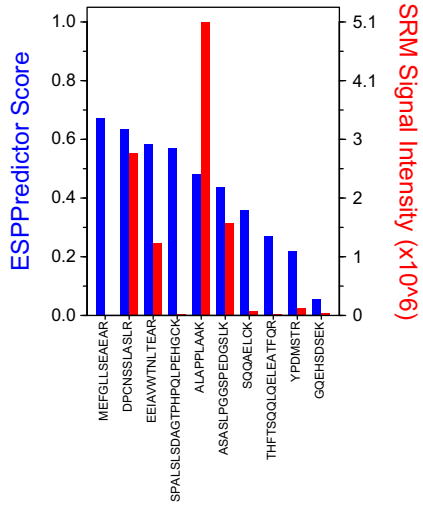

**ESPPredictor Rank vs. Empirical SRM Intensity Rank (Spearman=0.091)**

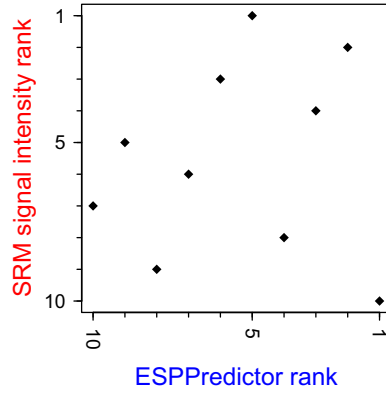

**PLEK2**  
ESPPredictor vs. Empirical SRM intensities

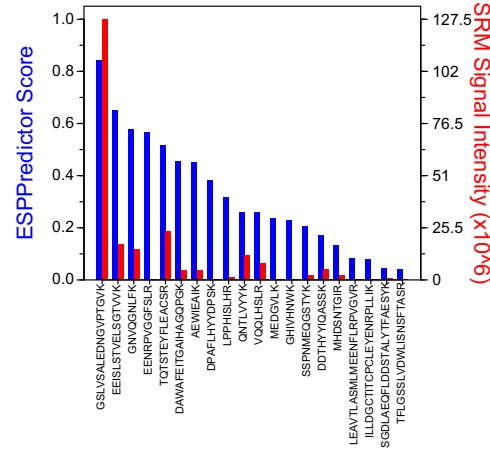

**ESPPredictor Rank vs. Empirical SRM Intensity Rank (Spearman=0.62)**

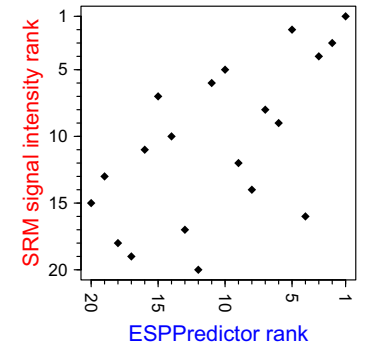

**POU3F4**  
ESPPredictor vs. Empirical SRM intensities

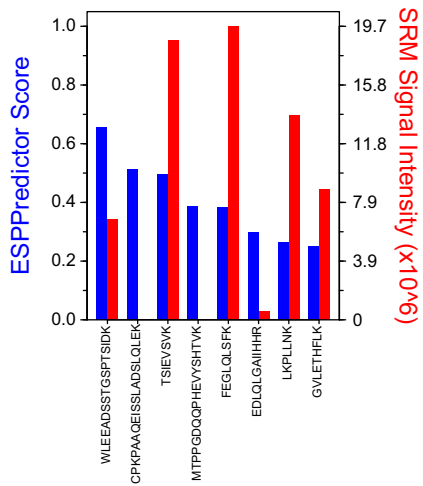

**ESPPredictor Rank vs. Empirical SRM Intensity Rank (Spearman=-0.26)**

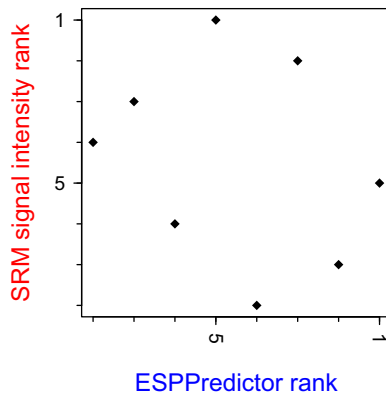

**POU4F1**  
ESPPredictor vs. Empirical SRM intensities

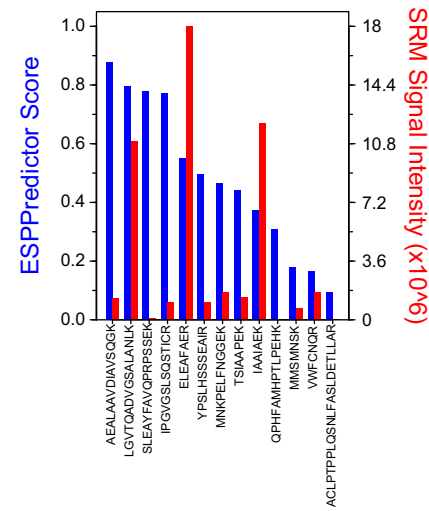

**ESPPredictor Rank vs. Empirical SRM Intensity Rank (Spearman=0.29)**

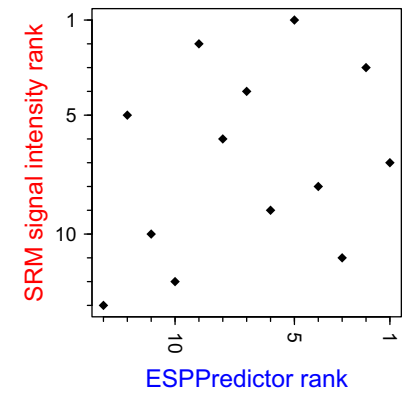

**POU4F3**  
ESPPredictor vs. Empirical SRM intensities

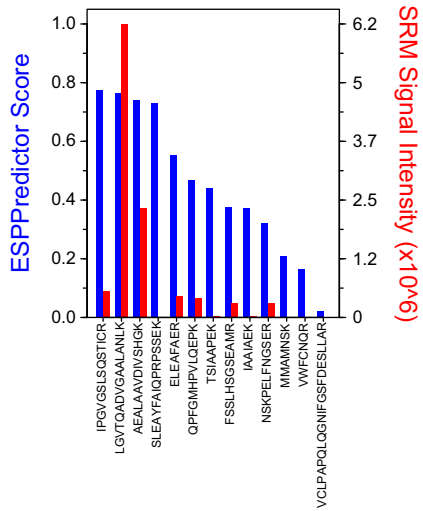

**ESPPredictor Rank vs. Empirical SRM Intensity Rank (Spearman=0.79)**

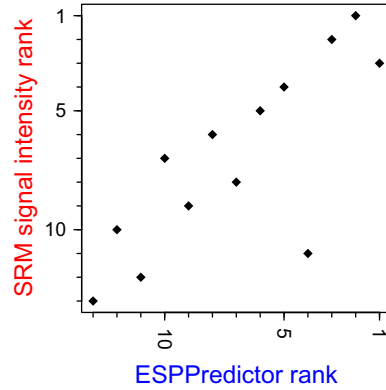

**PPARA**  
ESPPredictor vs. Empirical SRM intensities

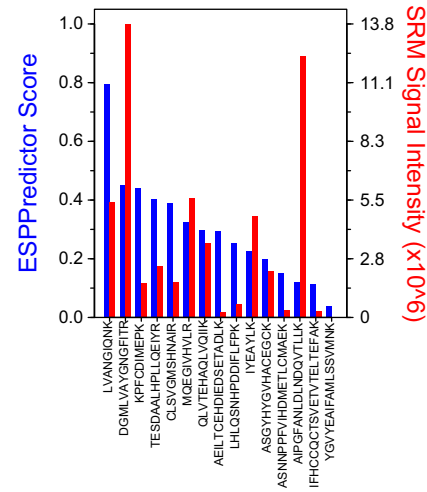

**ESPPredictor Rank vs. Empirical SRM Intensity Rank (Spearman=0.48)**

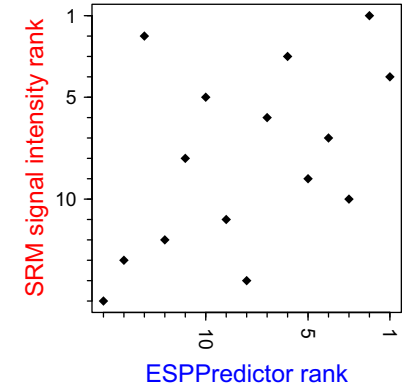

**SF3A2**  
ESPPredictor vs. Empirical SRM intensities

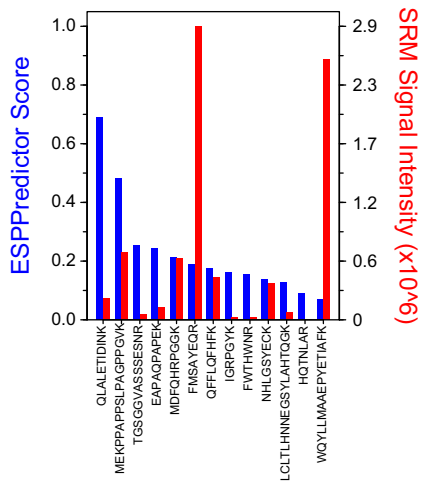

**ESPPredictor Rank vs. Empirical SRM Intensity Rank (Spearman=0.2)**

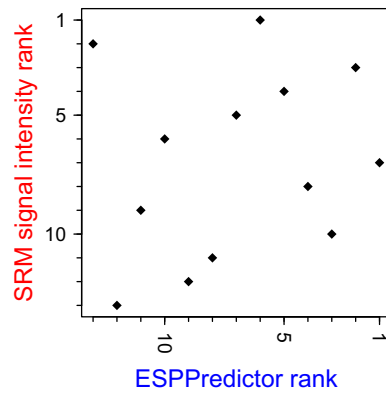

**SOX10**  
ESPPredictor vs. Empirical SRM intensities

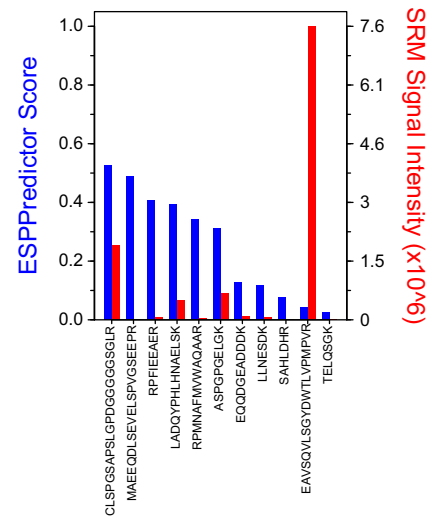

**ESPPredictor Rank vs. Empirical SRM Intensity Rank (Spearman=0.24)**

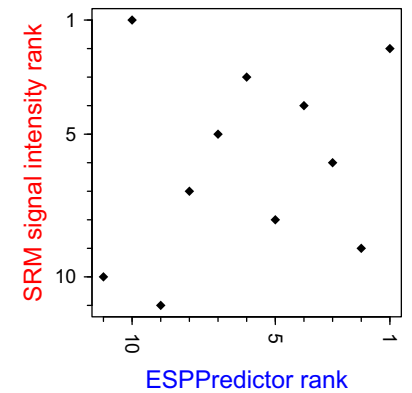

**SOX5**  
ESPPredictor vs. Empirical SRM intensities

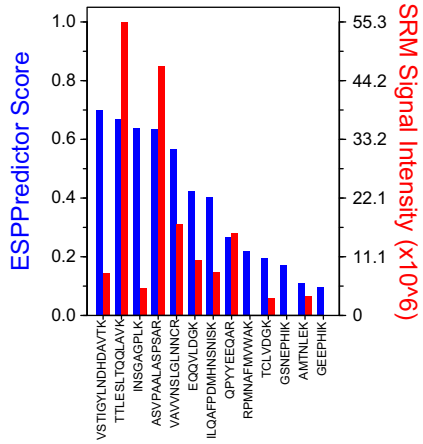

**ESPPredictor Rank vs. Empirical SRM Intensity Rank (Spearman=0.72)**

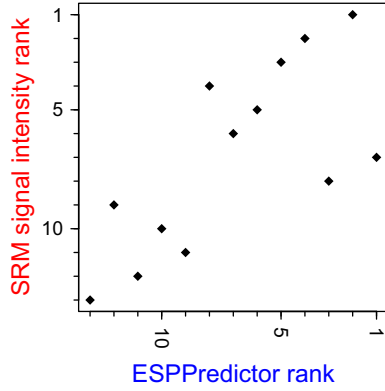

**SREBF2**  
ESPPredictor vs. Empirical SRM intensities

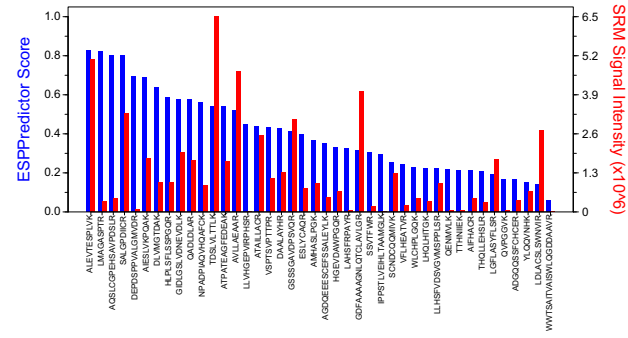

**ESPPredictor Rank vs. Empirical SRM Intensity Rank (Spearman=0.4)**

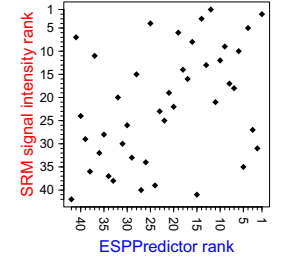

**STAT5A**  
ESPPredictor vs. Empirical SRM intensities

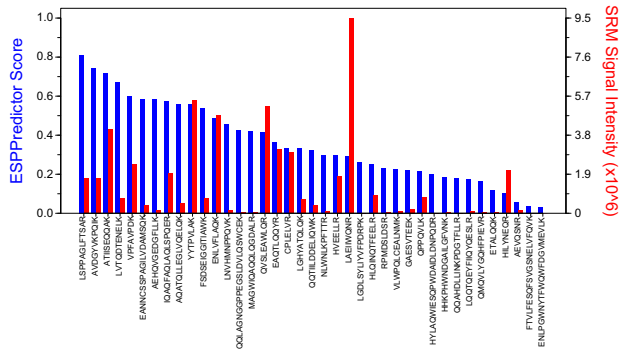

**ESPPredictor Rank vs. Empirical SRM Intensity Rank (Spearman=0.55)**

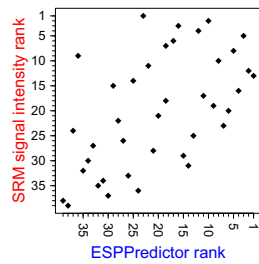

**STAT5B**  
ESPPredictor vs. Empirical SRM intensities

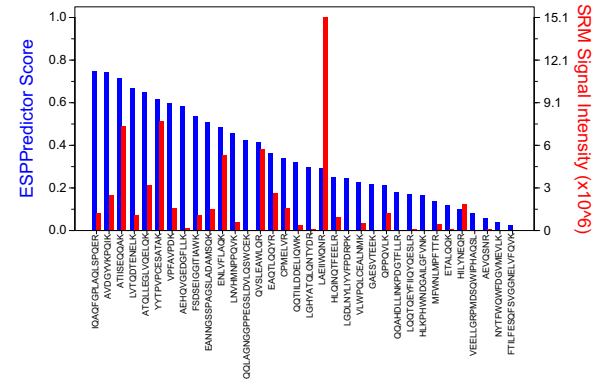

**ESPPredictor Rank vs. Empirical SRM Intensity Rank (Spearman=0.66)**

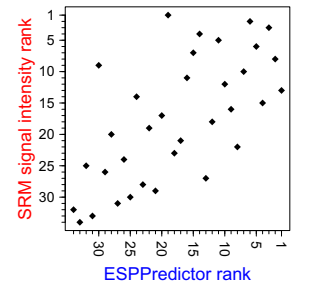

**TAF11**  
ESPPredictor vs. Empirical SRM intensities

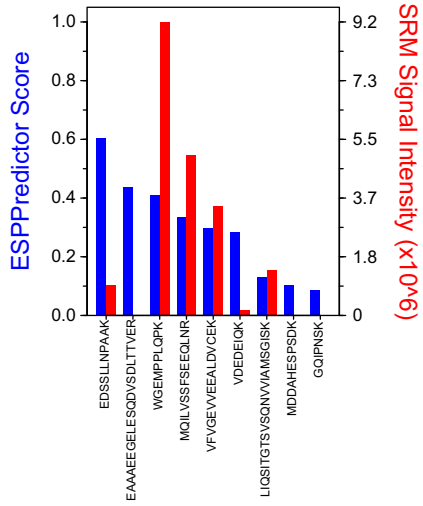

**ESPPredictor Rank vs. Empirical SRM Intensity Rank (Spearman=0.38)**

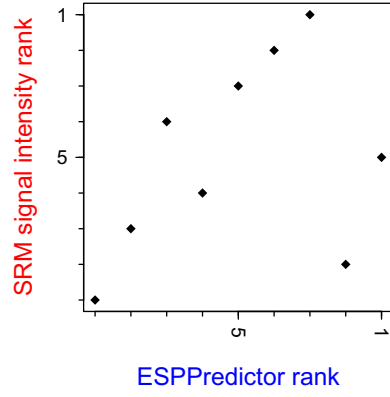

**TEF**  
ESPPredictor vs. Empirical SRM intensities

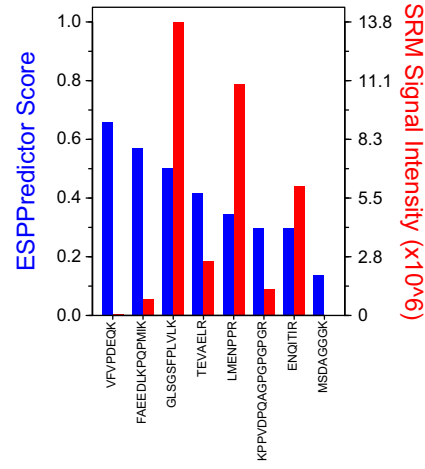

**ESPPredictor Rank vs. Empirical SRM Intensity Rank (Spearman=0.024)**

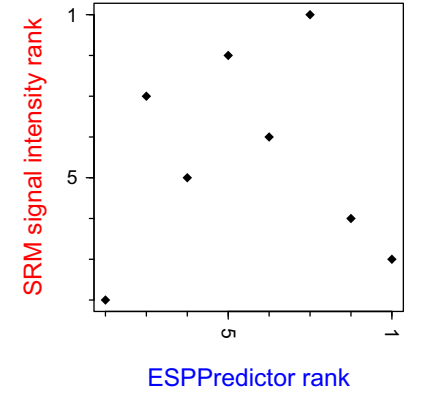

**TFAP2A**  
ESPPredictor vs. Empirical SRM intensities

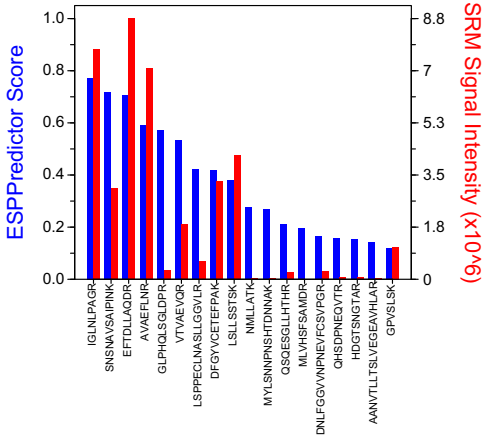

**ESPPredictor Rank vs. Empirical SRM Intensity Rank (Spearman=0.7)**

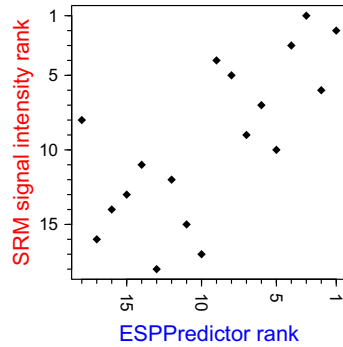

**TFAP2B**  
ESPPredictor vs. Empirical SRM intensities

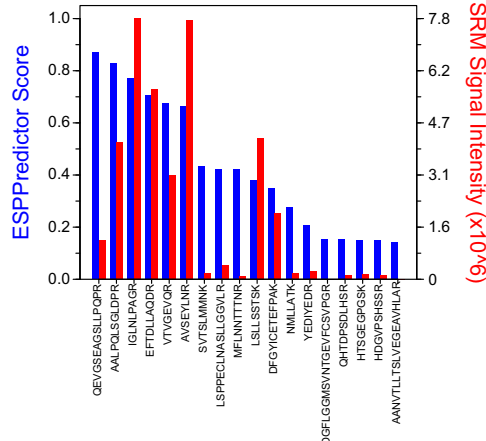

**ESPPredictor Rank vs. Empirical SRM Intensity Rank (Spearman=0.74)**

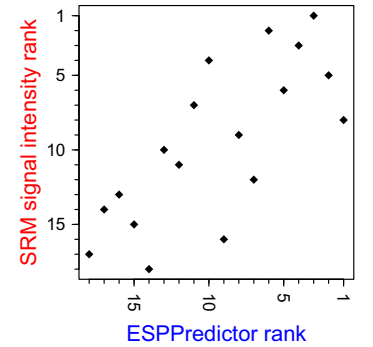

**TFCP2L1**  
ESPPredictor vs. Empirical SRM intensities

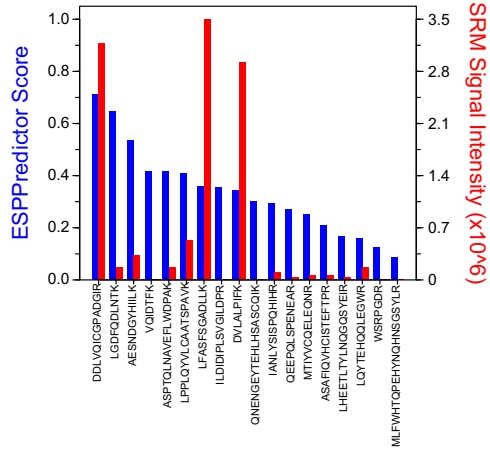

**ESPPredictor Rank vs. Empirical SRM Intensity Rank (Spearman=0.6)**

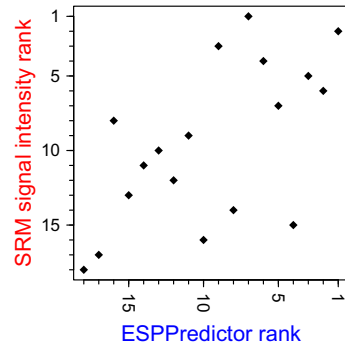

**TFCP2L4**  
ESPPredictor vs. Empirical SRM intensities

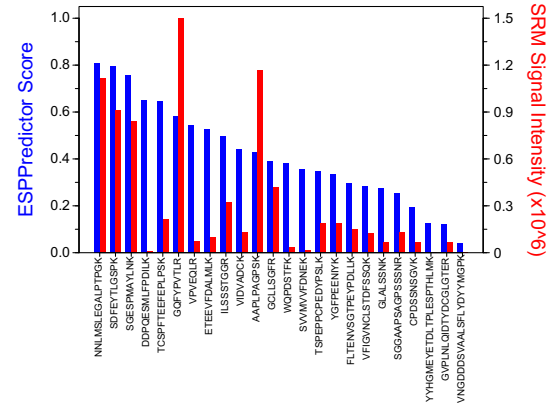

**ESPPredictor Rank vs. Empirical SRM Intensity Rank (Spearman=0.59)**

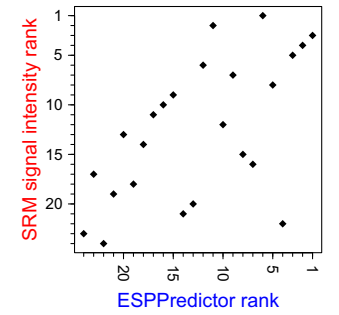

**T FDP2**  
ESPPredictor vs. Empirical SRM intensities

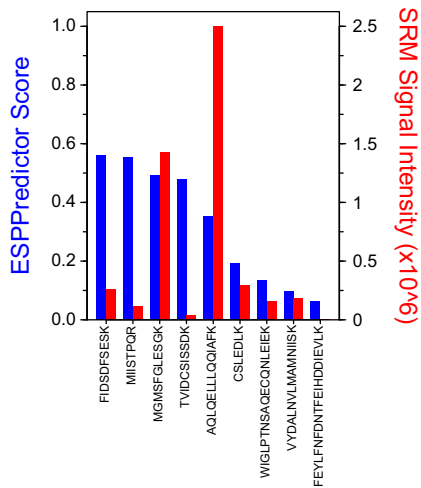

**ESPPredictor Rank vs. Empirical SRM Intensity Rank (Spearman=0.28)**

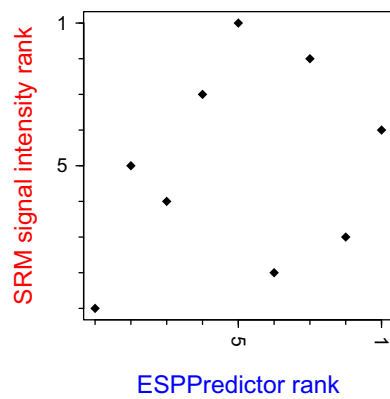

**TGIF2**  
ESPPredictor vs. Empirical SRM intensities

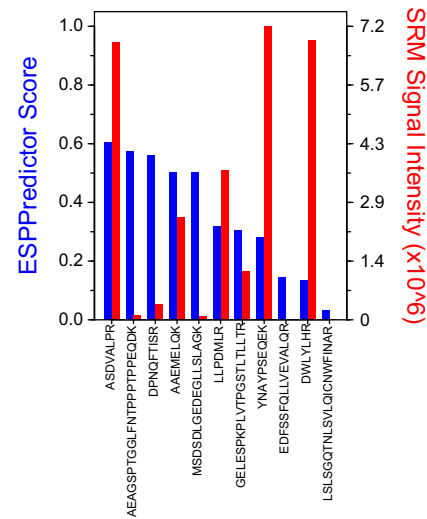

**ESPPredictor Rank vs. Empirical SRM Intensity Rank (Spearman=0.13)**

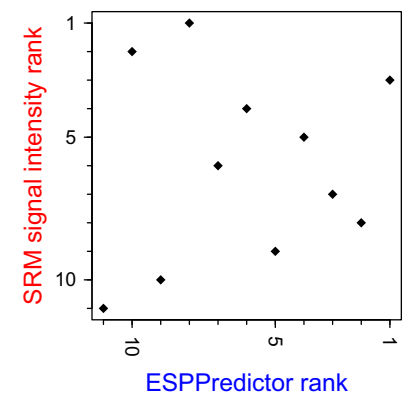

**TP53**  
ESPPredictor vs. Empirical SRM intensities

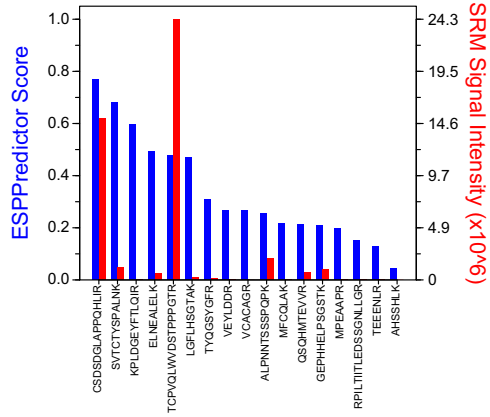

**ESPPredictor Rank vs. Empirical SRM Intensity Rank (Spearman=0.56)**

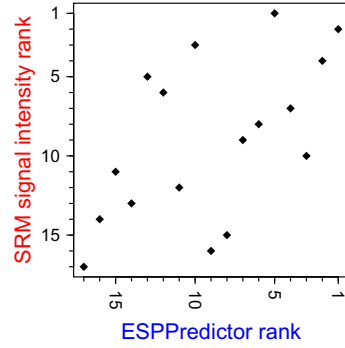

**TP73L**  
ESPPredictor vs. Empirical SRM intensities

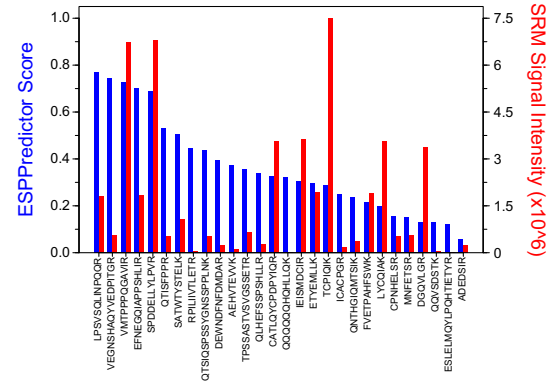

**ESPPredictor Rank vs. Empirical SRM Intensity Rank (Spearman=0.23)**

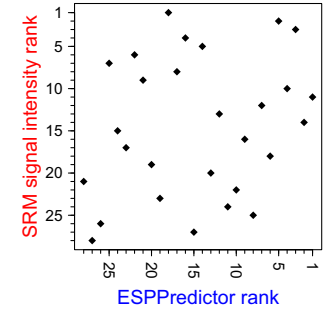

**XBP1**  
ESPPredictor vs. Empirical SRM intensities

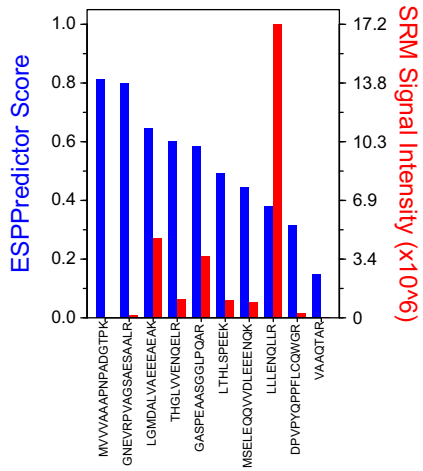

**ESPPredictor Rank vs. Empirical SRM Intensity Rank (Spearman=0.03)**

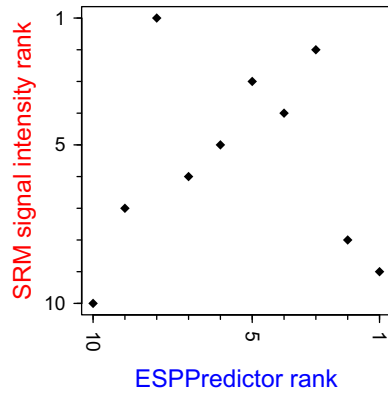

**ZMAT5**  
ESPPredictor vs. Empirical SRM intensities

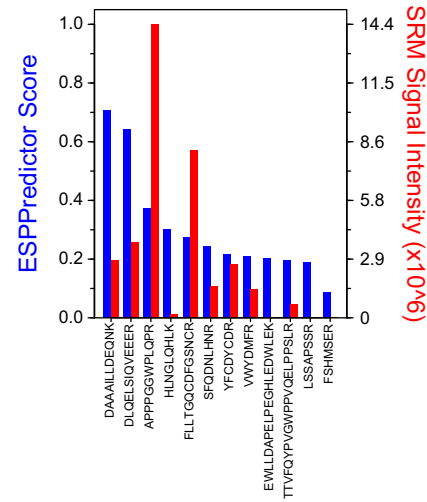

**ESPPredictor Rank vs. Empirical SRM Intensity Rank (Spearman=0.76)**

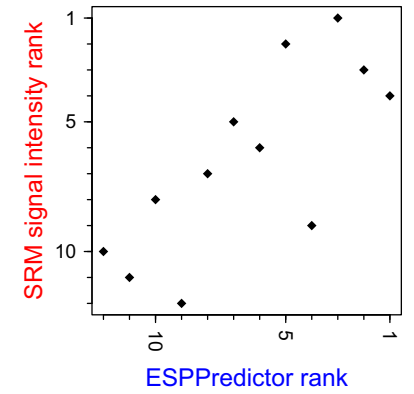

**ZNF496**  
ESSPredictor vs. Empirical SRM intensities

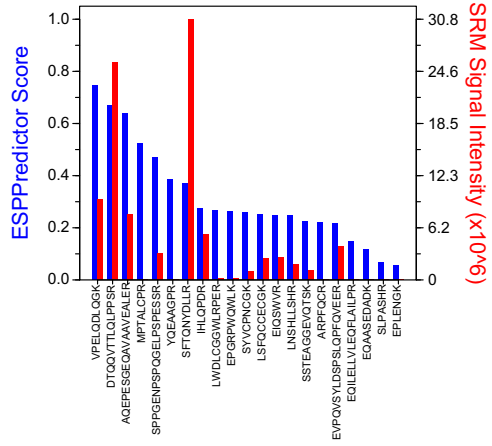

**ESSPredictor Rank vs. Empirical SRM Intensity Rank (Spearman=0.61)**

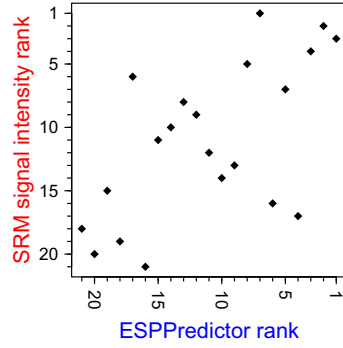

**ZNF70**  
ESSPredictor vs. Empirical SRM intensities

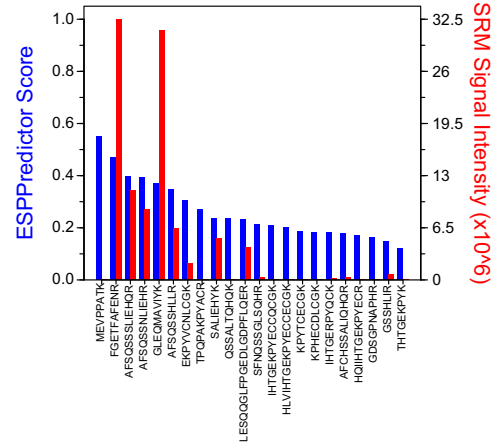

**ESSPredictor Rank vs. Empirical SRM Intensity Rank (Spearman=0.48)**

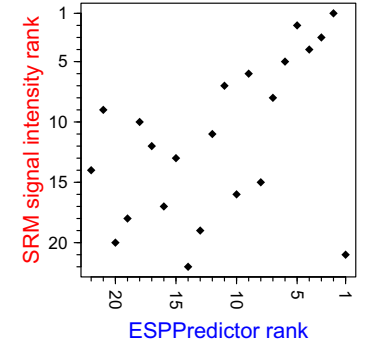

**ZNF74**  
ESSPredictor vs. Empirical SRM intensities

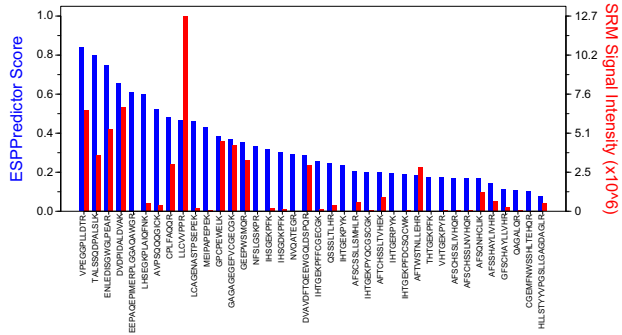

**ESSPredictor Rank vs. Empirical SRM Intensity Rank (Spearman=0.42)**

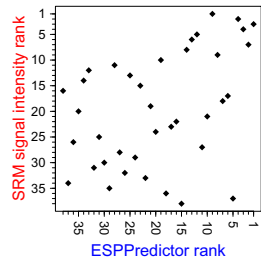

# Skyline Absolute Quantification

---

## Introduction

This tutorial covers how to determine the absolute abundance of a target protein using Selected Reaction Monitoring (SRM) mass spectrometry. Specifically, we will demonstrate how to use an external calibration curve with an internal standard heavy labeled peptide.

Peptide absolute abundance measurements can be obtained using either a single-point or a multiple-point calibration. Single-point calibration absolute abundance measurements are generated by spiking into a target sample a heavy labeled 'standard' version of the target peptide that is of known abundance. The absolute abundance of the 'sample' target peptide is obtained by calculating the relative abundance of the light 'sample' target peptide to the heavy 'standard' target peptide<sup>22</sup>. One drawback is that this approach assumes that a light-to-heavy ratio of 2 implies that the light peptide is actually twice as abundant as the heavy peptide – this is referred to as having a peptide response with a slope of 1. Furthermore, this approach of using a single point calibration makes the assumption that both the light and the heavy peptide are both within the linear range of the mass spectrometry detector. However, these assumptions are not always correct<sup>23,24,25,26</sup>.

Multiple-point calibration experiments correct for situations where the peptide response does not have a slope of 1. This calibration is done by measuring the signal intensity of a 'standard' peptide at multiple calibration points of known abundance and generating a calibration curve. This calibration curve can then be used to calculate the concentration of the target peptide in a sample, given the signal intensity of that peptide in that sample<sup>24</sup>. One drawback is that this method requires multiple injections into the mass spectrometer to build a calibration curve.

To improve the precision of absolute abundance measurements using an external calibration curve, stable isotope labeled internal standards are often used<sup>27</sup>. Imprecise measurements of the ion intensity of a peptide often arise from sample preparation, autosampler or chromatographic irregularities. By adding an identical quantity of a standard heavy labeled peptide to each of the calibrants and the sample, one is able to measure the ratio of calibrant-to-standard or sample-to-standard. This approach is favored as this ratio is unaffected by some sample preparation, autosampler or chromatographic irregularities. Consequently, by performing peptide absolute quantification using an external calibration curve and an internal standard heavy labeled peptide one is able to obtain the most accurate and precise measurements while minimizing the amount of valuable sample that has to be used.



## Experimental Overview

This tutorial will work with data published in Stergachis et al. 2011 where the absolute abundance of GST-tagged proteins were measured using a 'proteotypic' peptide present within the GST-tag (**Tutorial Figure 1A**). For any absolute quantification experiment, it is critical to first identify one or more 'proteotypic' peptides that will be used to quantify the protein of interest. The peptide IEAIPQIDK was identified as 'proteotypic' based on its strong signal intensity relative to other tryptic peptides in the GST-tag (unpublished). Also, this peptide uniquely identifies this schistosomal GST-tag as opposed to other human glutathione-binding proteins.

For this experiment, FOXN1 protein containing an in frame GST-tag was generated using *in vitro* transcription/translation and full-length proteins were purified using glutathione resin (**Tutorial Figure 1B**). Heavy labeled IEAIPQIDK peptide was then spiked into the elution buffer and the sample was digested and analyzed using selected reaction monitoring (SRM) on a Thermo TSQ Vantage triple-quadrupole mass spectrometer. An external calibration curve was generated using different quantities of a light IEAIPQIDK peptide that was purified to >97% purity and the concentration determined by amino acid analysis. Heavy labeled IEAIPQIDK peptide was also spiked into these calibrants at the same concentration as in the FOXN1-GST sample (**Tutorial Figure 1C**). It is important to note that it does not matter what the concentration of the heavy peptide is in each of the samples, so long as it is the same. However, it is best if the amount of heavy peptide in the samples is similar to the amount of light peptide originating from FOXN1-GST. Also, it is best if the concentration of the light peptide originating from FOXN1-GST falls somewhere in the middle of the concentration range tested using the different calibrants.

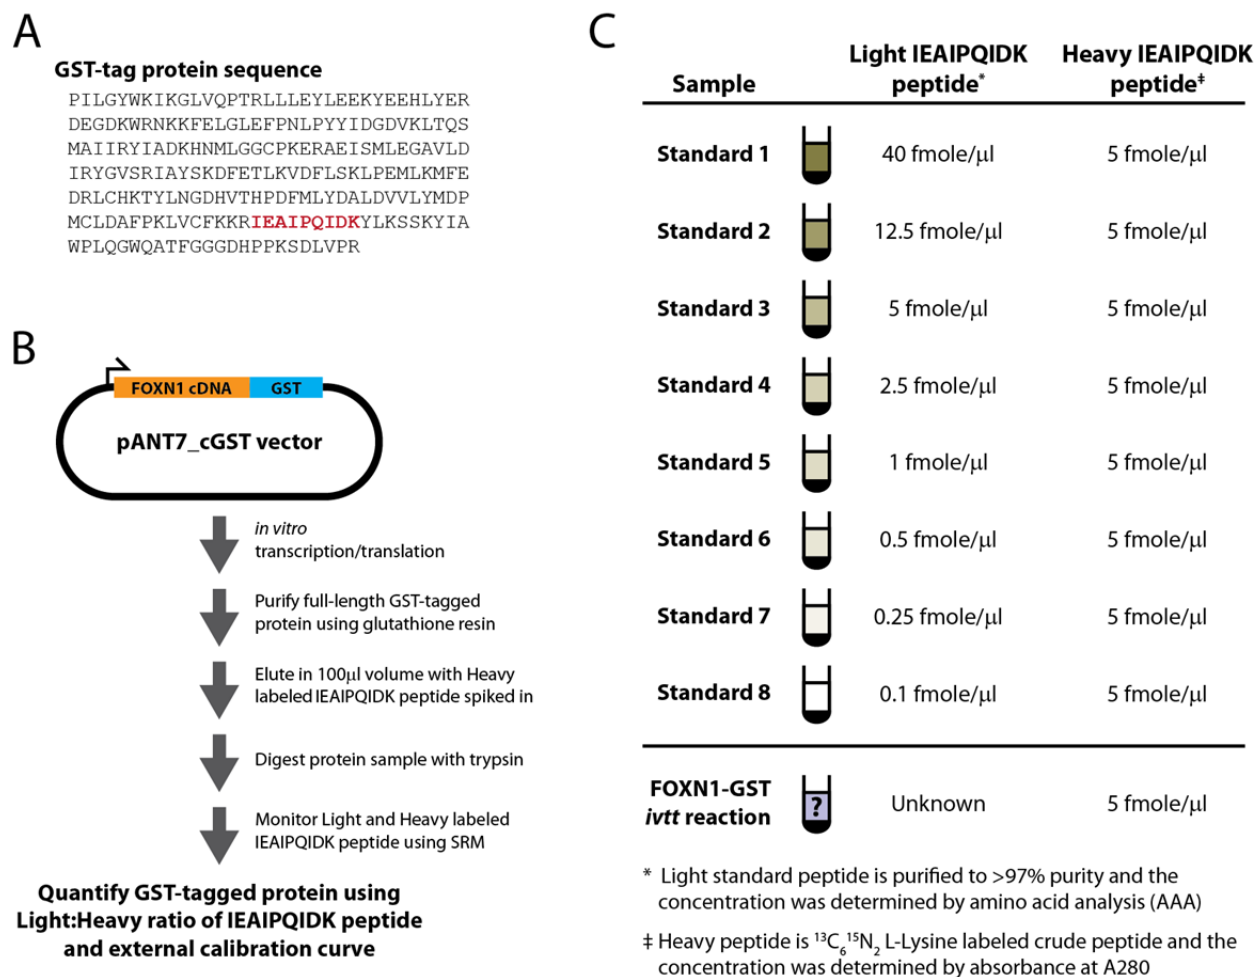

### Tutorial Figure 1. Experimental Overview

(A) Schistosomal GST-tag protein sequence. The tryptic peptide used for quantification purposes is indicated in red.

(B) Schematic of the synthesis, enrichment, digestion and analysis of tagged proteins.

(C) Samples monitored and the abundance of light and heavy IEAIPQIDK peptide in each.

## Getting Started

First, please check

(<https://skyline.gs.washington.edu/labkey/wiki/home/software/Skyline/page.view?name=tutorials>) to ensure that this tutorial is up-to-date. Periodic revisions of this tutorial will occur as additional features are added to Skyline.

To start this tutorial, download the following ZIP file:

<https://skyline.gs.washington.edu/tutorials/AbsoluteQuant.zip>

Extract the files in it to a folder on your computer, like:

C:\Users\absterga\Documents

This will create a new folder:

C:\Users\absterga\Documents\AbsoluteQuant

Now start Skyline, and you will be presented with a new empty document.

## Generating a Transition List

Before you insert a peptide sequence into Skyline, it is important to make sure that all of the peptide and transition settings are correctly configured for this experiment. The settings described below are designed for  $^{13}\text{C}_6^{15}\text{N}_2$  L-Lysine labeled internal standard peptides. If you are using a different isotope, please choose the appropriate isotope modification in the Peptide settings configuration.

### Configuring Transition settings:

- On **Settings** menu, click **Transition Settings**.
- Click the **Prediction** tab.
- Choose **Monoisotopic** for the **Precursor mass** and the **Product ion mass**.
- From the **Collision energy** drop-list choose the instrument that you will be using for your measurements. For this experiment, a **Thermo TSQ Vantage** was used for all measurements.
- Click the **Filter** tab.
- For these experiments we monitored doubly charged precursors (**Precursor charges**), and singly charged (**Ion charges**)  $y_3$  to  $y_{n-1}$  product ions (**Ion types** and **Product Ions From and To**).
- The correct configuration of these tabs can be seen below.

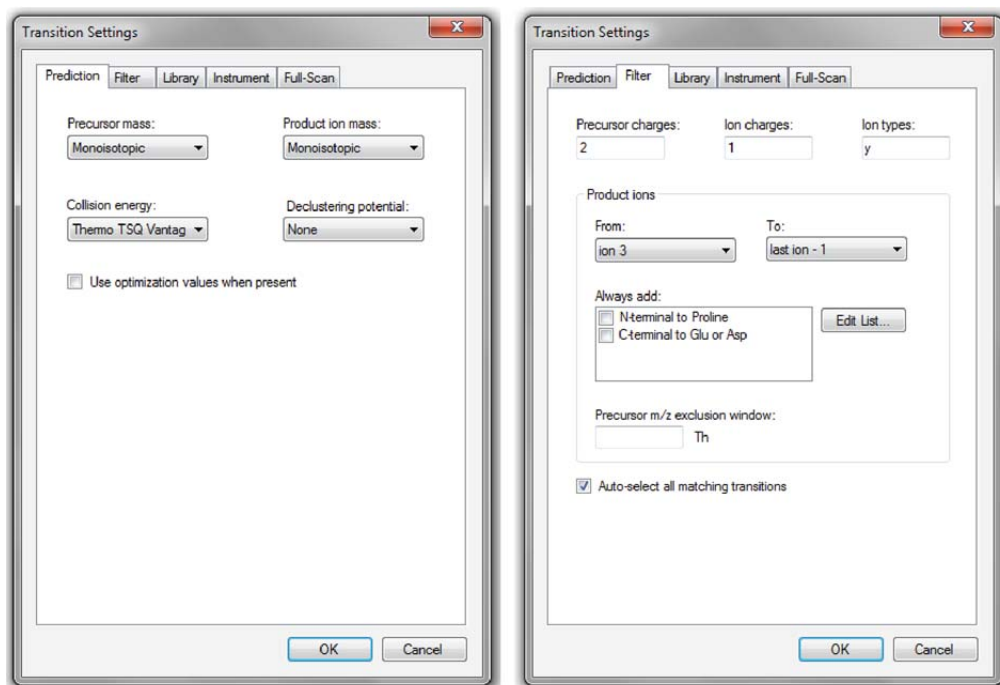

## Configuring Peptide settings:

- On the **Settings** menu, click **Peptide Settings**.
- Click the **Modifications** tab.
- Click the **Edit list** button for **Isotope modifications**.
- Click the **Add** button.
- Choose **Label:13C(6)15N(2) (C-term K)** from the **Name** dropdown list.
- Click the **OK** button.
- Check the new **Label:13C(6)15N(2) (C-term K)** modification in the **Isotope modifications** list.
- Since the experiment uses a heavy labeled internal standard peptide, ensure that the **Internal standard type** drop-list is set to **heavy**.

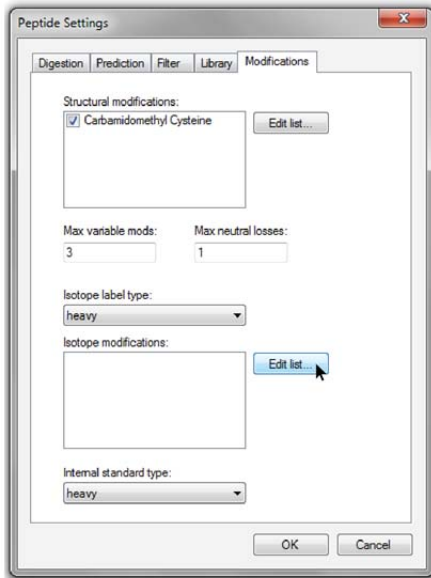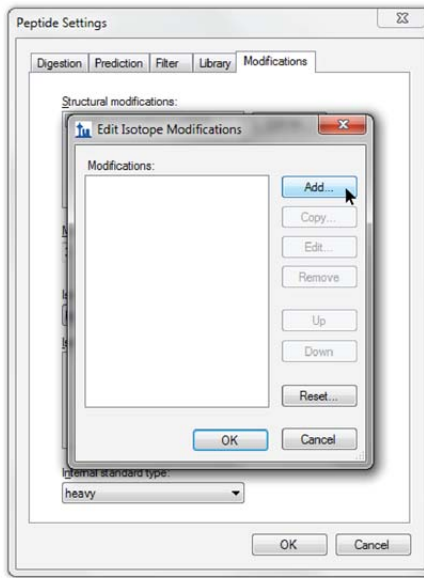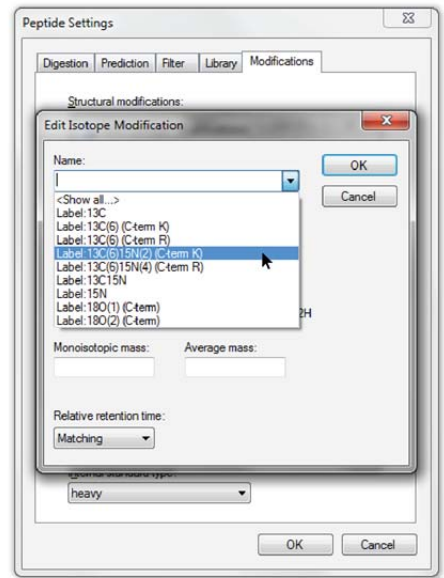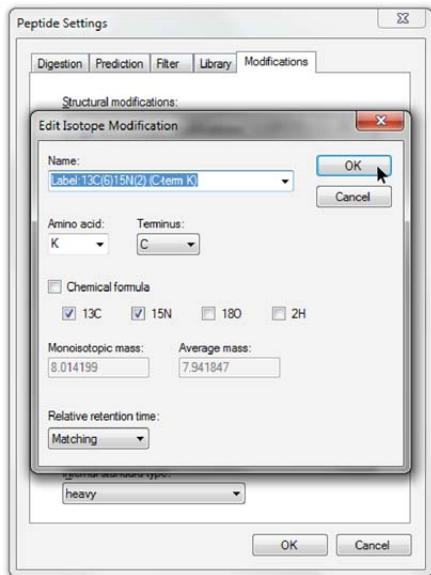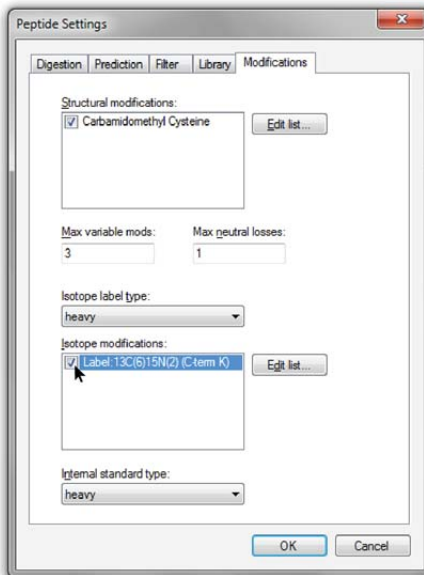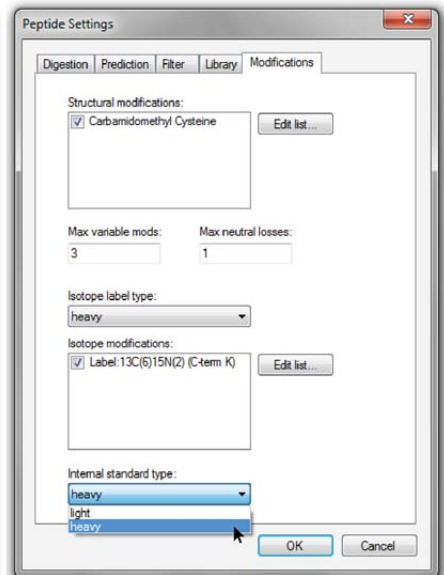

## Inserting a peptide sequence:

- On the **Edit** menu, choose **Insert** and click **Peptides**.
- Paste *IEAIPQIDK* into the **Peptide Sequence** box and *GST-tag* into the **Protein Name** box.
- Click the **Insert** button.

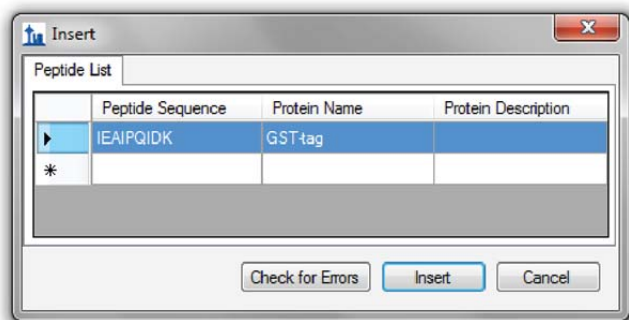

After performing the above steps, the main screen of Skyline should appear as below. You can save this file as test\_file or whatever you like in the folder you have created for this tutorial.

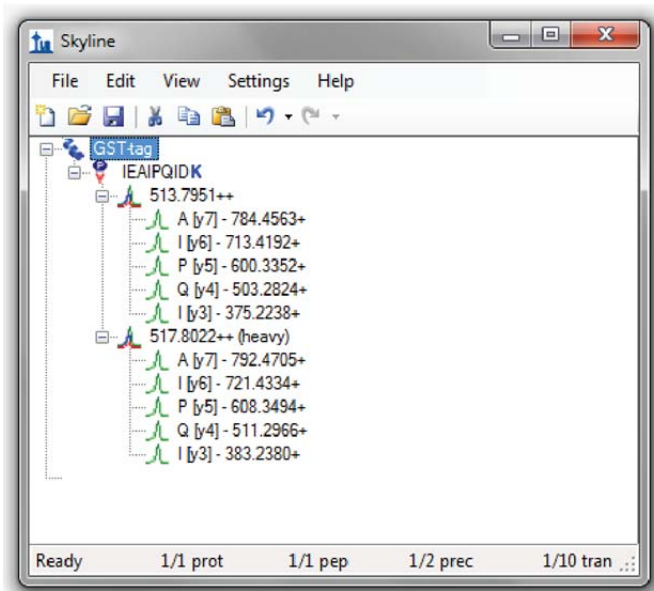

## Exporting a transition list:

- On the **File** menu, choose **Export** and click **Transition List**.
- The **Export Transition List** form can be configured as desired. Below is what was used for this experiment
- This exported transition list was used to generate an SRM method for a Thermo TSQ Vantage triple-quadrupole mass spectrometer.

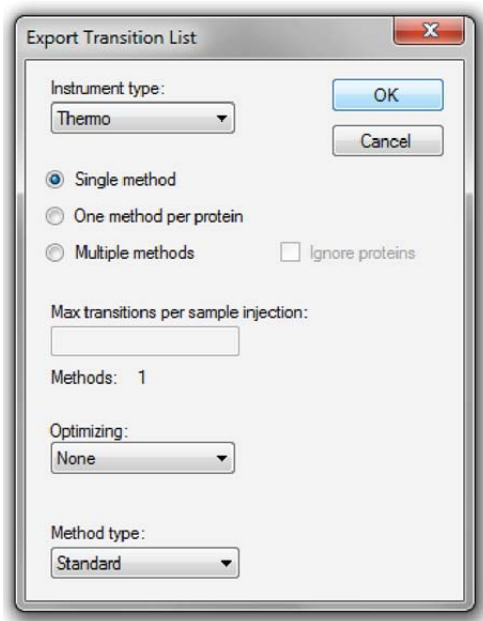

## Analyzing SRM Data from Calibrants

In this next section you will work with the nine samples indicated in **Tutorial Figure 1C**. You will import the .RAW files into Skyline to view the data. Data will be imported into the saved Skyline document that was generated in the previous section. The files that you will import are contained in the folder you created for this tutorial and are called:

- Standard\_1.RAW
- Standard\_2.RAW
- Standard\_3.RAW
- Standard\_4.RAW
- Standard\_5.RAW
- Standard\_6.RAW
- Standard\_7.RAW
- Standard\_8.RAW
- FOXN1-GST.RAW

These RAW files were collected in a random order and were interspersed amongst a larger set of runs contained within **Supplemental Data 2** for the original paper ([http://proteome.gs.washington.edu/software/skyline/ivt\\_srm/Supplementary\\_data\\_2.zip](http://proteome.gs.washington.edu/software/skyline/ivt_srm/Supplementary_data_2.zip)).

Before you look at the FOXN1-GST sample, you should first become familiar with the standards.

### Importing RAW files into Skyline:

- On the **File** menu, choose **Import** and click **Results**.
- Click the **Add single-injection replicates in files** option in the **Import Results** form.

- Click the OK button.
- In the **Import Results Files** form, find and select all eight *Standard* RAW files listed above.
- Click **Open** to import the files.
- When presented with the option to remove the 'Standard\_' prefix in creating replicate names, click **Do not remove**.

It may take a few moments for Skyline to import all of the RAW files.

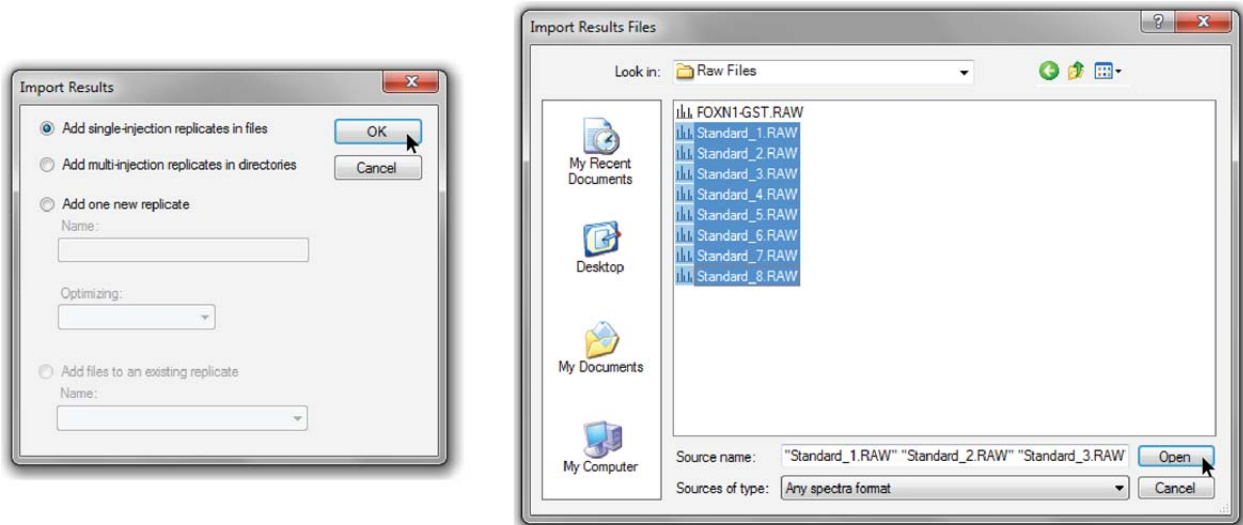

To ensure that the chromatographic peaks for each of the standards looks good, it is best to view all of the traces next to each other in a tiled view.

This can be done by clicking ctrl-T or on the **View** menu, by choosing **Arrange Graphs** and clicking **Tiled**.

If you select the IEAIPQIDK peptide on the left side of the screen, you will see the heavy (Blue) and light (Red) traces loaded into the same window for each standard.

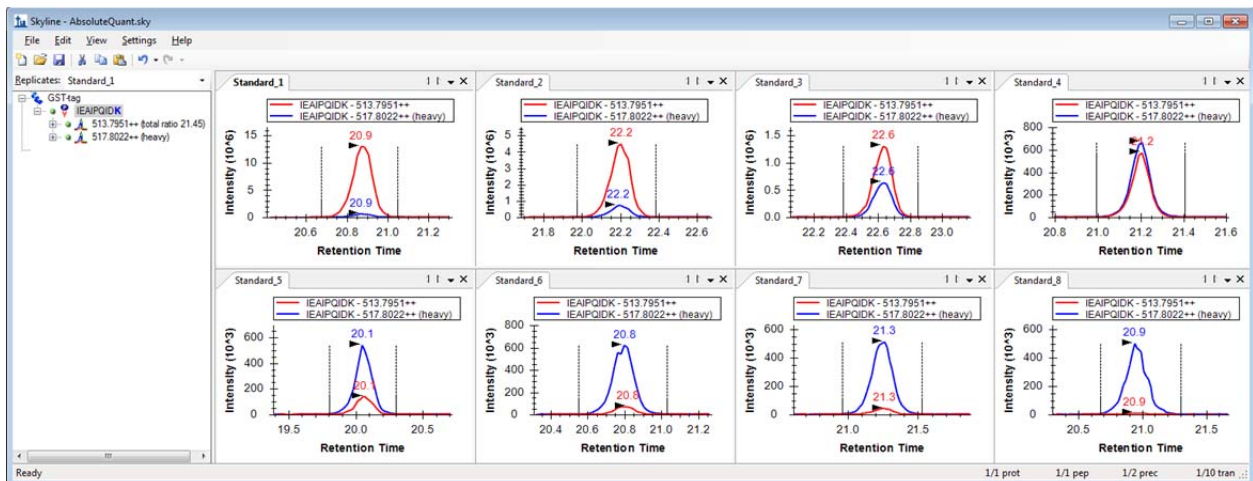

What to inspect when looking at the chromatographic traces for the standards:

- Make sure that the correct peak is selected for both the heavy and light trace of each standard.
- Make sure the peak shapes look Gaussian and do not show an excessively jagged appearance. If this is the case, it may be best to rerun your samples.
- Make sure that the retention time is similar for the different standards. Widely varying retention times often indicate poor chromatography.

## Analyzing SRM Data from FOXN1-GST Sample

Next you will want to import the FOXN1-GST.RAW file into the current Skyline document using the same instructions as detailed above. To ensure that this sample looks good, we will inspect the chromatographic trace, the fragmentation pattern and the retention time of both the heavy and light peak.

Because this is already a refined method, on the **Settings** menu, click **Integrate All**.

To focus on just the FOXN1-GST data, on the **View** menu, choose **Arrange** and click **Tabbed** (Ctrl-Shift-T), and click on the FOXN1-GST tab.

The **Retention Time** comparison graph can be displayed by pressing F8 or on the **View** menu, by choosing **Retention Times** and then clicking **Replicate Comparison**.

The **Peak Areas** comparison graph can be displayed by pressing F7 or on **View** menu, by choosing **Peak Areas** and then clicking **Replicate Comparison**.

To view the relative contribution of each transition to the total signal intensity, you can right-click on the **Peak Areas** graph, choose **Normalized To** and click **Total**.

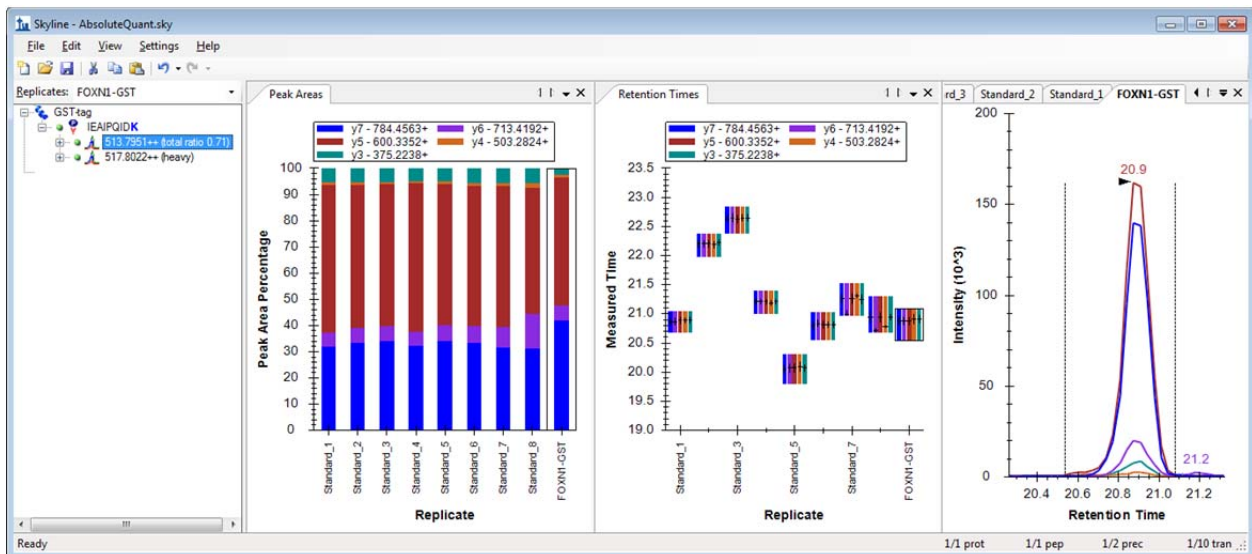



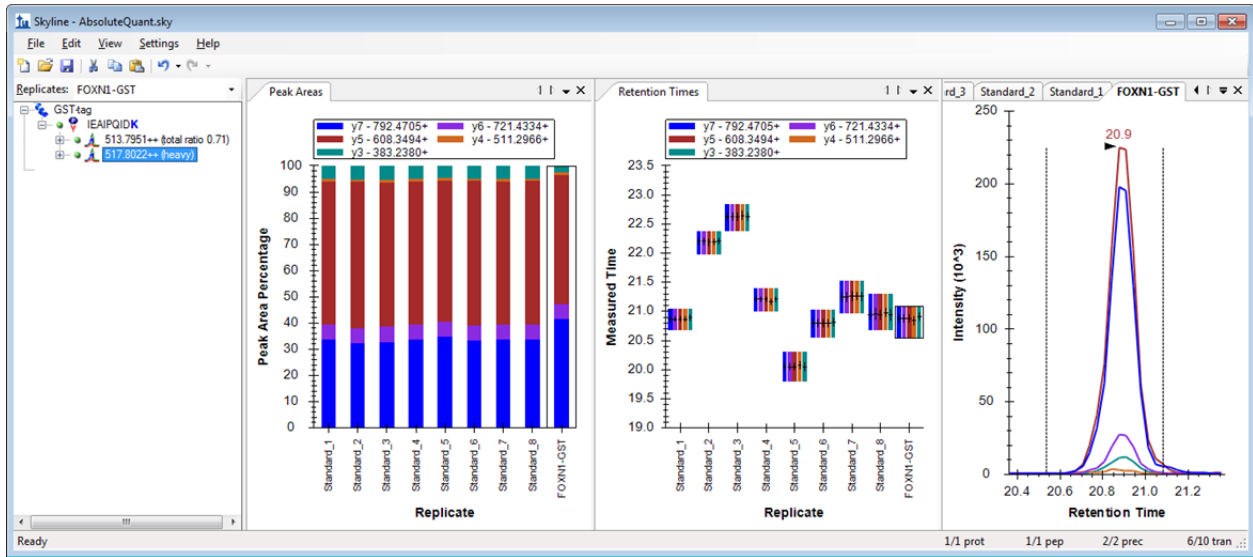

You can then select either the light or heavy precursor and inspect to ensure that:

- The correct peak is selected for both the heavy and light trace.
- The peak shape looks Gaussian and does not show an excessively jagged appearance.
- The retention time is similar for the standards and the FOXN1-GST sample.
- The relative contribution of each transition to the total signal is similar for each sample. If this does not appear to be so, then an incorrect peak is likely selected for one of the samples.

Another way to view the data is to select the IEAIPQIDK peptide in the Peptide View to the left, as opposed to the individual light and heavy precursor ions.

To view the light-to-heavy ratio for each standard and the FOXN1-GST sample, you can right-click on the **Peak Areas** graph, choose **Normalized To** and click **Heavy**.

The values displayed in this **Peak Areas** graph will be the ones we use to build our calibration curve. It can be easily observed from this graph that the light-to-heavy ratio for the FOXN1-GST sample falls somewhere in the middle of the ratios from our calibration points. This is ideal, as this portion of the calibration curve is best for quantification purposes.

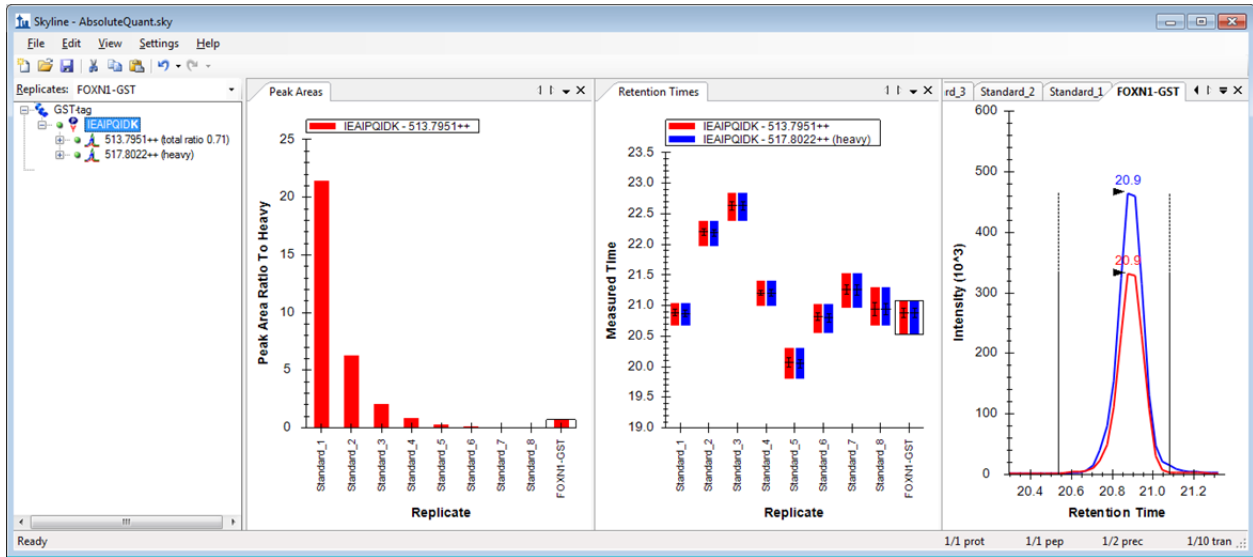

## Generating a Calibration Curve

For this tutorial, you will make a calibration curve using Microsoft Excel. However, this can be done using other graphical or statistical programs such as R.

## Exporting data from Skyline:

- On the **File** menu, choose **Export** and click **Report**.
- Click **Edit List** and then **Add** to specify the columns that will appear in the report.
- For this experiment you will want to have identifying features for each sample, as well as the **RatioToStandard** (See below for the parameters included).
- Once the report is configured, you can provide a **Report Name**.

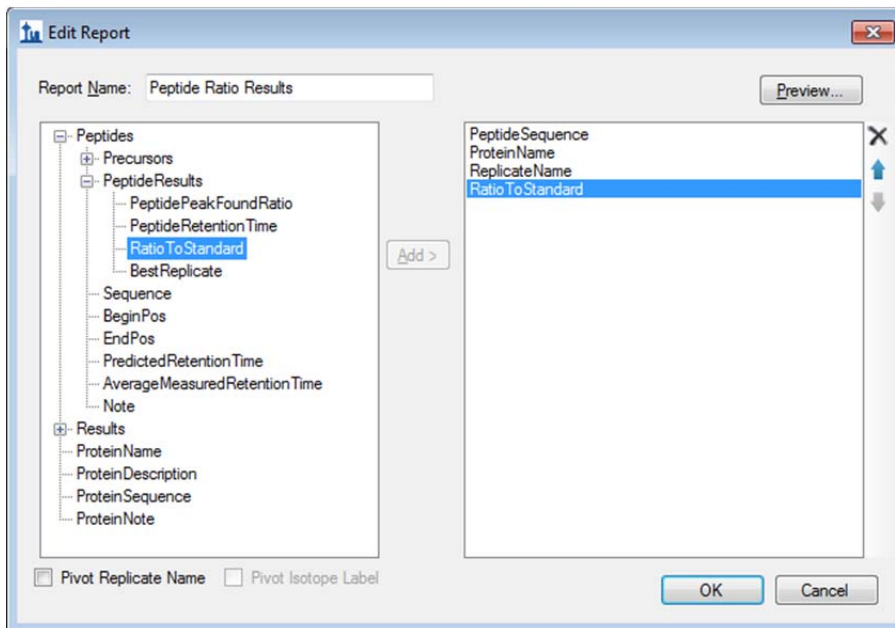

- Click **OK**.
- Click **OK** in the **Edit Reports** form.
- Click **Export** in the **Export Report** form.
- Enter 'Calibration.csv' in the **File name** field of the save form that appears.
- Click **Save**.

When opened in Excel, the exported report should look like this:

|    | A               | B           | C             | D               | E |
|----|-----------------|-------------|---------------|-----------------|---|
| 1  | PeptideSequence | ProteinName | ReplicateName | RatioToStandard |   |
| 2  | IEAIPQIDK       | GST-tag     | Standard_1    | 21.4513         |   |
| 3  | IEAIPQIDK       | GST-tag     | Standard_2    | 6.2568          |   |
| 4  | IEAIPQIDK       | GST-tag     | Standard_3    | 2.0417          |   |
| 5  | IEAIPQIDK       | GST-tag     | Standard_4    | 0.8244          |   |
| 6  | IEAIPQIDK       | GST-tag     | Standard_5    | 0.2809          |   |
| 7  | IEAIPQIDK       | GST-tag     | Standard_6    | 0.1156          |   |
| 8  | IEAIPQIDK       | GST-tag     | Standard_7    | 0.0819          |   |
| 9  | IEAIPQIDK       | GST-tag     | Standard_8    | 0.0248          |   |
| 10 | IEAIPQIDK       | GST-tag     | FOXN1-GST     | 0.7079          |   |
| 11 |                 |             |               |                 |   |

To generate a calibration curve, you first need to specify for each standard the concentration of the light IEAIPQIDK peptide. These values can be found in **Tutorial Figure 1C** and are also displayed below.

Once these known concentrations are entered, you can display the calibration curve by selecting the values, as indicated below, and clicking the **Insert** tab and then **Scatter Plot**.

A trendline for the calibration curve can be generated by right-clicking on the data points within the graph and selecting **Add Trendline**. From the trendline options, you will want to select **Linear Regression**. In more recent versions of Excel, you will also want to make sure the check boxes are checked to display the equation and the R-squared value on the chart.

Now inspect the trendline to ensure that:

- None of the standards drastically depart from it.
- The data points still appear to follow the trendline even at the lower concentration points.
- The  $R^2$  value is high, indicating a good fit.

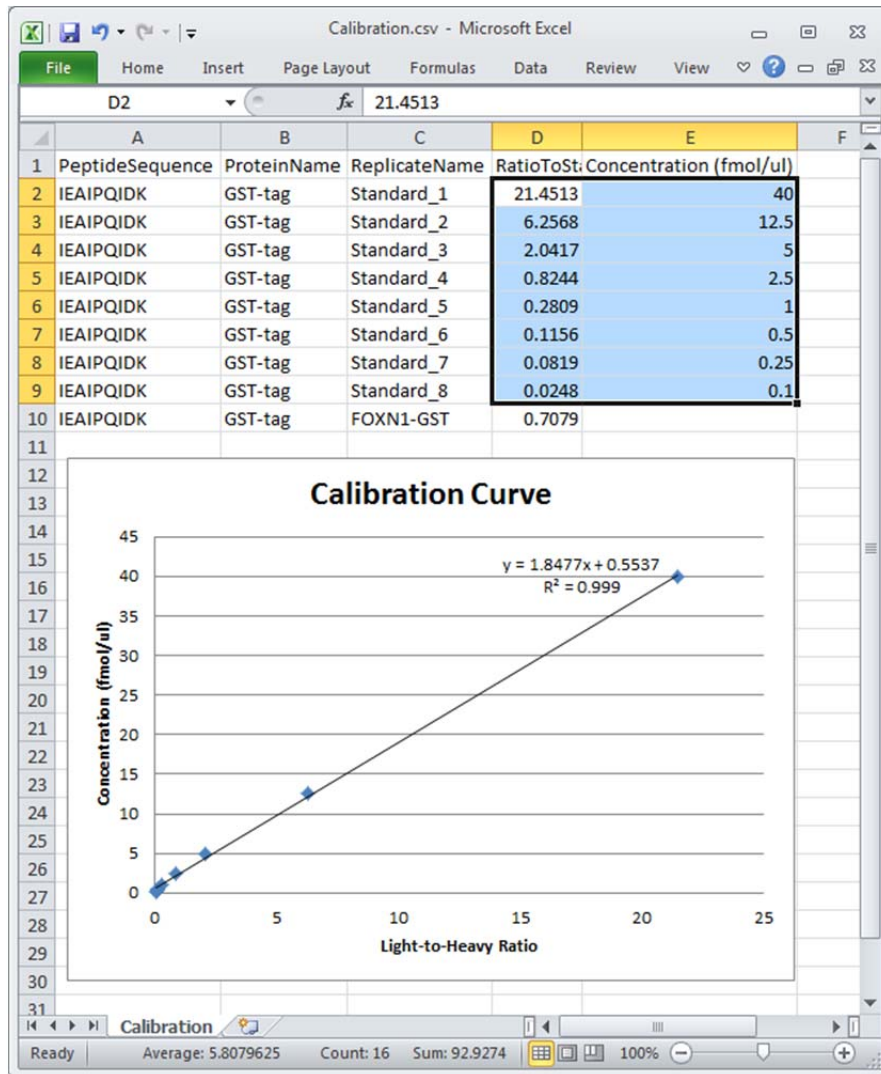

## Calculating the Concentration of the FOXN1-GST Sample

To calculate the concentration of the light IEAIPQIDK peptide within the FOXN1-GST sample you will use the calibration curve from the previous section. This will allow you to calibrate the light-to-heavy ratio of IEAIPQIDK within the FOXN1-GST sample to known concentrations. To do this, you must first identify the slope and intercept of the calibration curve.

To do this, you can select two adjacent cells in Excel and type into the equation dialog:

**=LINEST(E2:E9,D2:D9)**

*E2:E9 are the y-values (Concentration)*

*D2:D9 are the x-values (light-to-heavy ratio)*

Then press **ctrl-shift-Enter** and the Slope and Intercept will be displayed in the two selected cells

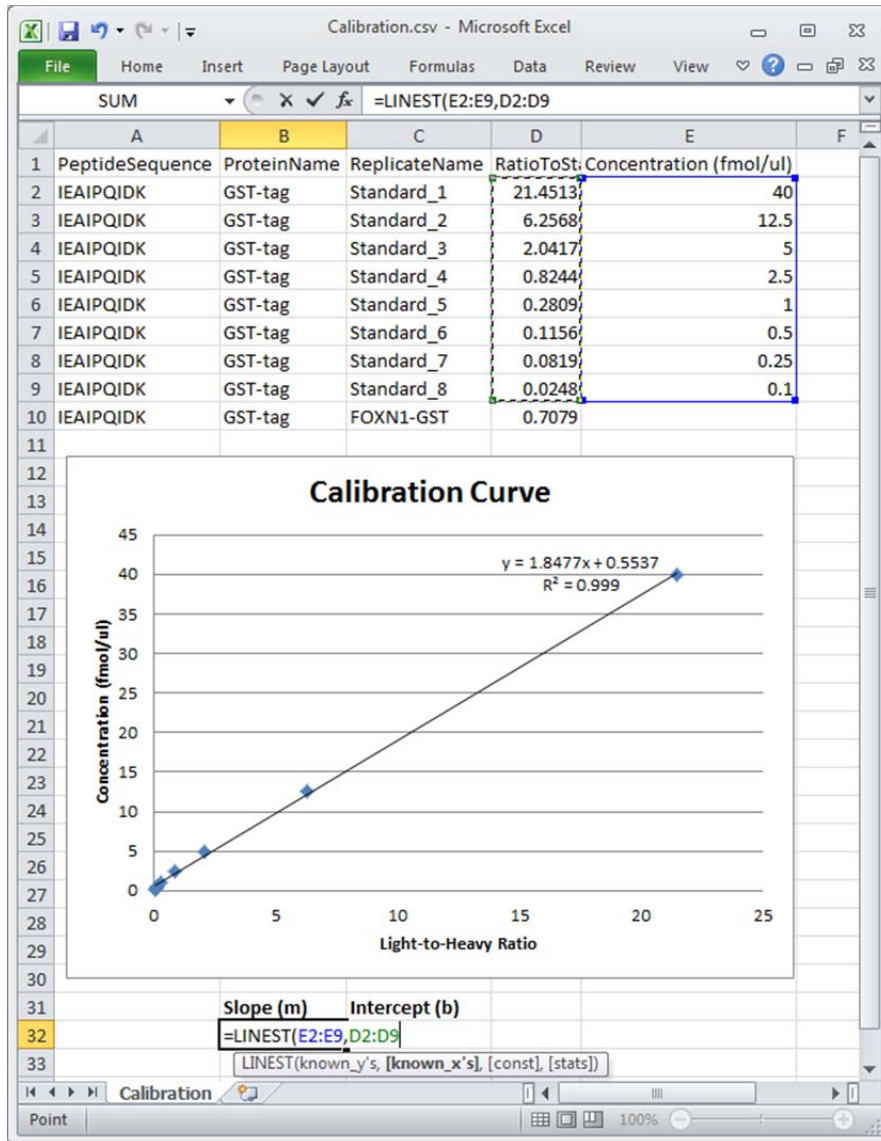

Using this linear equation the concentration of any unknown sample (y-value) can be obtained by inserting the light-to-heavy ratio of that sample (x-value) into a standard  $y = m \cdot x + b$  equation ( $concentration = slope \cdot ratio + intercept$ ).

We can do this for the FOXN1-GST sample in excel by typing into a cell:

**=B32\*D10 + C32**

*B32 is the slope of the linear regression*

*D10 is the light-to-heavy ratio of the FOXN1-GST sample*

*C32 is the Intercept of the linear regression*

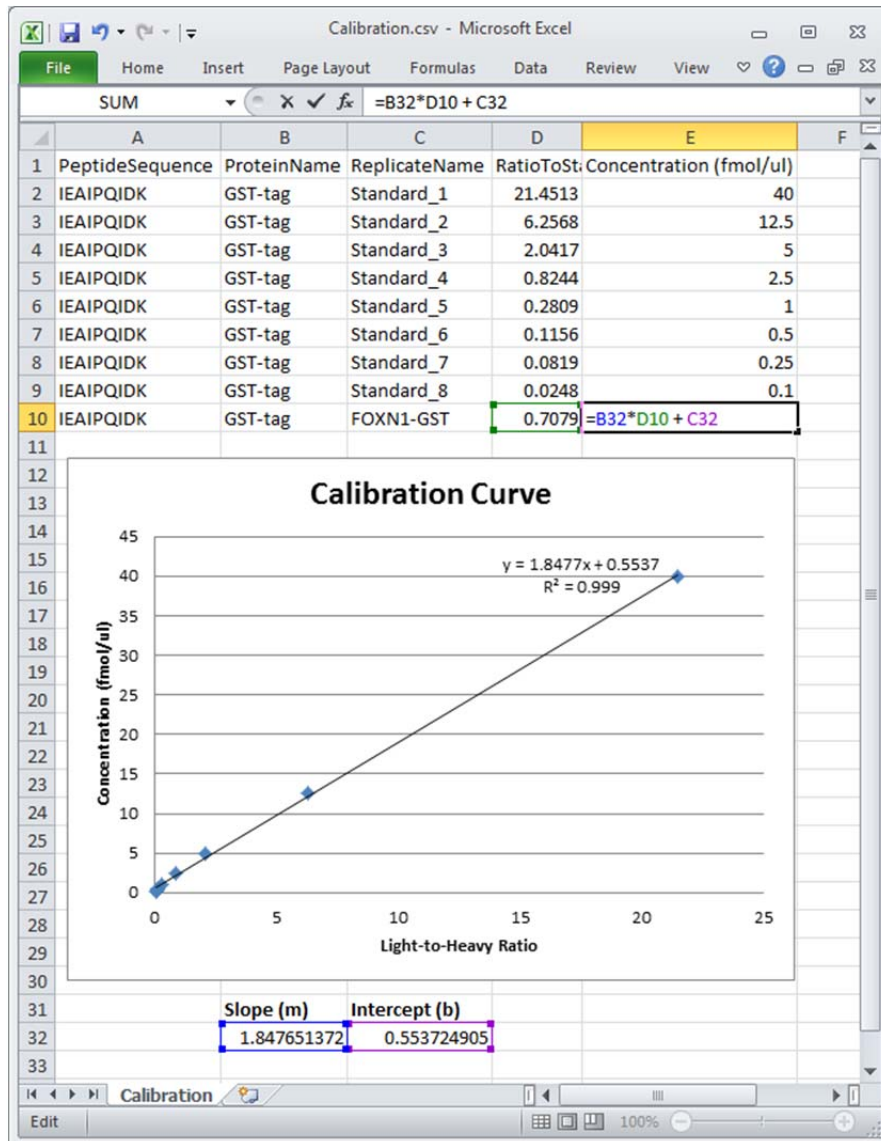

This yields the value 1.86 as the concentration of FOXN1-GST within our sample. This concentration is in units fmole/ $\mu$ l or nM, as this is the concentration of our calibrants used for the linear regression.

Since the purified FOXN1-GST reaction was resuspended in 100  $\mu$ l total volume, we can state that there are 189 femtomoles, or  $1.13 \cdot 10^{11}$  molecules of FOXN1-GST within our sample.

## Conclusion

This tutorial presented the advantages of different absolute abundance experimental setups and demonstrated how to determine absolute abundances using an external calibration curve with an internal standard heavy labeled peptide. This method provides accurate and precise absolute measurements while minimizing the amount of valuable sample that has to be used during the experiment.

## Reference List

22. Gerber, S.A., Rush, J., Stemman, O., Kirschner, M.W. & Gygi, S.P. Absolute quantification of proteins and phosphoproteins from cell lysates by tandem MS. *Proceedings of the National Academy of Sciences of the United States of America* **100**, 6940-6945 (2003).
23. MacCoss, M.J., Wu, C.C., Matthews, D.E. & Yates, J.R. Measurement of the isotope enrichment of stable isotope-labeled proteins using high-resolution mass spectra of peptides. *Analytical Chemistry* **77**, 7646-53 (2005).
24. Lavagnini, I. & Magno, F. A statistical overview on univariate calibration, inverse regression, and detection limits: Application to gas chromatography/mass spectrometry technique. *Mass spectrometry reviews* **26**, 1-18
25. Watson, J.T. Mass Spectrometry. *Methods in Enzymology* **193**, 86-106 (1990).
26. Patterson, B.W. & Wolfe, R.R. Concentration dependence of methyl palmitate isotope ratios by electron impact ionization gas chromatography/mass spectrometry. *Biological mass spectrometry* **22**, 481-6 (1993).
27. MacCoss, M.J., Toth, M.J. & Matthews, D.E. Evaluation and optimization of ion-current ratio measurements by selected-ion-monitoring mass spectrometry. *Analytical chemistry* **73**, 2976-84 (2001).
